# Supplementary material for: Association of Receiving Multiple, Concurrent Fracture-Associated Drugs With Hip Fracture Risk
Source: PubMed Central journal article supplement (PMC6902800; doi:10.1001/jamanetworkopen.2019.15348), 2019-11-13
Supplement: jamanetwopen-2-e1915348-s001.pdf [file jamanetwopen-2-e1915348-s001.pdf]

## Supplementary Online Content

Emeny RT, Chang C-H, Skinner J, et al. Association of receiving multiple, concurrent fracture-associated drugs with hip fracture risk. *JAMA Netw Open*. 2019;2(11):e1915348. doi:10.1001/jamanetworkopen.2019.15348.

**eAppendix.** Receipt of Multiple, Concurrent Fracture-Associated Drugs and Hip Fracture Risk

**eFigure 1.** Cohort Creation Diagram

**eFigure 2.** Total and Age-Group Specific Crude Fracture Rates Among Women and Men Exposed to FADs and Non-FADs

**eTable 1.** Select Literature Summary, Mechanisms Through Which Drugs Confer Fracture Risk

**eTable 2.** *International Classification of Diseases, Ninth Revision (ICD-9)* Diagnosis Codes Used to Identify Fractures and Morbidities

**eTable 3.** Specific Drugs Included in Fracture-Associated and Fracture-Protective Drug Groups

**eTable 4.** Descriptive Distribution of Drug Use Over Study Period by Sex

**eTable 5.** Number and Category of Fracture-Associated Drug Group Exposures Included in Drug-Specific Models

**eTable 6.** Cox Regression Model Results, Associations Between Number of Current Fracture-Associated Drugs and Other Drugs with Hip Fracture

**eTable 7.** Cox Proportional Hazard Model Output: Hip Fracture Risk Associated With Fracture-Associated Drugs Among Women

**eTable 8.** Cox Proportional Hazard Model Output: Hip Fracture Risk Associated With Fracture-Associated Drugs Among Men

This supplementary material has been provided by the authors to give readers additional information about their work.

## **eAppendix.** Receipt of Multiple, Concurrent Fracture-Associated Drugs and Hip Fracture Risk

### **Cohort Creation:**

Because of the two-year Parts A and B coverage requirement, the minimum age was 67 years at the start of Part D drug receipt observation.

Patients with cancer (except non-melanoma of the skin) were conservatively excluded due to risk of pathologic fracture that may be unrelated to drug exposure and imperfectly identified as a cancer-related fracture in claims. Patients with advanced renal disease were also excluded due to risk of fracture related to renal failure and the possibility of receiving drugs during dialysis that would not appear in our claims data. We excluded hospice patients because some medications are included in the hospice per diem payments and thus may not be apparent in our claims data.

We excluded beneficiaries with vertebral fractures at any time during the look-back or observation because the temporal relationship between occurrence and diagnosis of vertebral fractures can vary tremendously. Vertebral fractures are often found incidentally on images obtained for reasons unrelated to fracture. All patients with a past fragility fracture were conservatively excluded from this study because we aimed to study *first* fragility fractures rather than a beneficiary's second or third fragility fracture. Prior fracture is an important fracture risk factor and undoubtedly an effect modifier; this small, high-risk, population must be studied separately by methods appropriate for smaller populations with an event as the key cohort inclusions criterion.<sup>1</sup> Additionally, fragility fracture survivors have a distinctly high fracture risk and their prescriptions may be managed distinctly as a result; their vulnerability to additive adverse drug effects may be different as well. We will study them separately.

Patients censored due to disenrollment in fee-for-service A, B and D plans were permitted to reenter the study as long as they met the inclusion criteria.

### **Drug Exposure:**

For fracture associated drugs, the LexiComp Basic database was used to obtain the active ingredient and product information for each National Drug Code (NDC) apparent in the

Part D Event file. Exposure was assumed to begin on the date of prescription dispensing. We used the “days supply” variable to set exposure duration. Overlapping supplies were carried forward (e.g. a fill occurring 80 days after a 90-day fill resulted in a 10-day supply carried forward). For drugs not refilled at the end of the days-supply, discontinuation was assigned after a time elapse of 120% of most recent days-supply, assuming imperfect adherence.

Other drug exposures that were classified as non-fracture associated drug (Non-FAD) exposures represented 552 distinct systemic drug ingredients according to the First Databank (FDB, South San Francisco, CA) Hierarchical Ingredient Code Parent HIC4 Sequence Number (HIC\_ROOT); FDB groups ingredients with the same base drug molecule. A 4-level, non-FAD exposure indicator variable was created which flagged 0 or 1 non-FAD exposures on a single day, and aggregated any 2 concurrent non-FAD drug exposures on a single day, and separately any 3 or more concurrent non-FAD drug exposures on a single day. Thus other drug exposures were always included in models as a categorical/numeric indicator for 0, 1, 2 and 3+ concurrent non-FAD exposures. See Technical Appendix Table 1 below for the Ultimate Parent Enhanced Therapeutic Classification Names that contributed to the top 20 most common non-FADs. For example, Cardiovascular Therapy Agents included angiotensin converting enzyme-inhibitors, statins, and angiotensin II receptor blockers, and Analgesic, Anti-inflammatory or Antipyretic drugs included non-narcotic analgesics and NSAID analgesics (COX Non-Specific).

### **Outcomes:**

Hip fractures were selected as the outcome for this study of fracture associated drugs (FADs) because hip fractures are generally treated in the inpatient setting. Thus, the date of fracture occurrence can be reliably ascertained in claims, as can the sequence of prescription receipt and fracture. This issue of sequence of drug receipt and fracture is particularly challenging when assessing other fragility fractures (humerus, wrist, vertebra) as small differences or errors in recorded dates can affect the apparent sequence between medication receipt and fracture occurrence and result in erroneous causal inference. This is especially important for opioids which are often prescribed to treat fracture pain.

**Analytic Approach:**

The study design assured model assumptions were satisfied with regard to non-informative censoring; individuals were censored with the occurrence of death or disenrollment from fee-for-service Medicare Part A, B or D. The probability of a fracture occurring is not related to disenrollment, but may be related to unmeasured factors associated with death.

**Risk Adjustment and Stratified, Hierarchical Models.** Our empirical analysis addresses two key issues in the identification of fracture risks associated with multiple drug use. First, concerns about unmeasured confounding are addressed by risk-adjustment and stratification by sex. This is further explored in sex-specific age stratified models. Additionally, we perform a sensitivity analysis with a model including only non-drug variables (no drug exposure indicators) to explore the estimates associated with known risk factors when prescription exposure is not considered. Second, we ran hierarchical models using increasingly granular definitions of drug exposures. Our first models include total drug exposure: as a continuous variable and then, separately as a categorical variable representing 0, 1, 2 or 3 or more total concurrent drugs. We then grouped drugs into FAD and non-FAD categories representing 0, 1, 2 or 3-or-more concurrent drugs to determine if combinations of FAD or non-FAD exposures confer greater risk than none, or single exposures. We repeated this categorical approach using FAD and non-FAD designations in age-stratified models. Finally, we assessed approximately 200 specific single and combination exposures in a sex-specific models, applying the Benjamini-Hochberg false-discovery-rate (FDR) control procedure.<sup>2,3</sup> With the very large number of possible drug combinations, we are concerned about falsely rejecting the null for specific interaction effects and therefore control for multiple testing.

Our study has been designed to control for both time varying drug exposures and time varying covariates. We use the counting process survival analysis approach<sup>7,8</sup> to capture exposures with high sensitivity (at a day level) allowing each beneficiary to contribute time to diverse categories of exposure person days (control) in observed follow-up times. Additionally, we accounted for acquisition of health conditions over time that may impact medications received and risk of fracture. Models were stratified on sex, an anticipated effect modifier.

**Cox Models.** In the FAD count exposure analysis, the exposure predictors are binary indicators of the number of FADs taken at time  $t$ , where  $t$  ranges over the days the beneficiary meets eligibility criteria. Because patients change status with respect to these variables over follow-up and the time to fracture may be censored, we use the counting process form of the Cox model to estimate the risk of each number of FADs. The model has the form

$$h(t|\mathbf{X}_i(t)) = h_0(t)\exp(\beta_1 X_{1i}(t) + \beta_2 X_{2i}(t) + \beta_3 X_{(3+)i}(t) + \boldsymbol{\beta}_{cov}^T \mathbf{X}_{cov,i}(t))$$

where  $X_{ki}(t) = 1$  if patient  $i$  received  $k$  FAD at time  $t$  and 0 otherwise for  $k = 1, 2, \geq 3$  and the regression coefficients  $\beta_k$  represent the effect of a patient receiving  $k$  FAD versus 0 FAD at a given time. In addition,  $\mathbf{X}_{cov}(t)$  is a vector of covariates comprising:

COVStatic = covariates that do not change over observation time, i.e. sex, race, original eligibility

COVAnnual = covariates that are updated annually= age, LIS, Medicaid eligibility

COVAbsorptive = covariates that once in are always in for an individual, i.e. comorbidities, LTC

In the drug and drug-pair specific analysis, for each drug exposure (RX) the time-dependent exposure will equal either a single FAD (single exposure (SE),  $n=21$  FADs), a double exposure of two distinct FADs (double exposure (DE),  $n=210$  combined exposures), or a general three-or-more distinct FAD exposure at time  $t$ . The model has the form:

$$\begin{aligned} &h(t|\mathbf{X}_i(t)) \\ &= h_0(t)\exp(\beta_1 RXSEFAD_{1i}(t) + \dots + \beta_{21} RXSEFAD_{21i}(t) + \beta_{22} RXDEFAD_{1i}(t) + \dots \\ &+ \beta_{231} RXDEFAD_{210i}(t) + \beta_{232} FAD_{(3+)i}(t) \\ &+ \beta_{RXPro} RX_{RXPro,i}(t) + \beta_{1NonFAD} RX_{NonFAD}_{1i}(t) + \beta_{2NonFAD} RX_{NonFAD}_{2i}(t) + \beta_{3+NonFAD} RX_{NonFAD}_{3+i}(t) \\ &+ \boldsymbol{\beta}_{cov}^T \mathbf{X}_{cov,i}(t)) \end{aligned}$$

where  $RXSEFAD_{ki}(t) = 1$  if drug  $k = 1, \dots, 21$  is the only single FAD taken by patient  $i$  at time  $t$ ,  $RXDEFAD_{ki}(t) = 1$  if drug pair  $k = 1, \dots, 210$  corresponds to the only two FADs patient  $i$  is taking at time  $t$ ,  $RX_{NonFAD}_{ki}(t) = 1, 2, 3+$  if drug  $k = 1, 2, 3+$  corresponds to Non-FADs taken by patient  $i$  at time  $t$ , and  $RX_{RXPro,i}(t) = 1$  if drug(s) taken by patient  $i$  is an osteoprotective drug.

**Competing Risk Analysis.** In sensitivity analyses, Cox proportional hazard models were fit in the presence of the potential competing risk of death using the Fine-Gray method which models the cumulative incidence of an event of interest (fracture) given a competing event (death). The resulting subdistribution hazard ratio (SHR) describes the probability of events occurring over time associated with the relative effect of a covariate.<sup>9,10</sup> Sensitivity analyses were additionally run using the cause-specific hazard models which estimate the effect of covariates on the rate of events over time.<sup>9</sup>.

## Results

**Risk adjustment, drug exposure and crude rates.** Hierarchical conditions category (HCC) score was calculated to facilitate comparison of our cohort to the general, Medicare population, (national median is 1.0); higher scores indicate more morbidities.<sup>11,12</sup> Hierarchical conditions category scores (mean, SD) were 0.97 (0.91) for women and 1.01 (0.99) for men.

Among women, 27% of person-days were exposed to zero non-FADs, 17% to one non-FAD, 18% to two non-FADs and 38% to three-or-more non-FADs. Exposure among men was similar. See Table 2 in main text.

Crude fracture rates associated with non-FADs were modestly higher than those of women. Receipt of none, or any one, two, or three or more non-FADs was associated with crude fracture rates of 4.44/1000 PY, 6.16/1000 PY, 6.80/1000 PY and 8.38/1000 PY among women, and 2.00/1000 PY, 2.73/1000 PY, 3.01/1000 PY and 3.71/1000 PY for men, respectively (Appendix Figure 2 and Technical Appendix Tables 2a and 2b, respectively for women and men). Person years of exposure to increasing FADs were similar across age strata, and crude rates increased with age and drug use, as expected.

**Hierarchical Cox Models.** The risk estimates for chronic conditions (but not other risk factors such as age/race) were slightly higher in models that did not include any drug exposure variable (Appendix Table 6, Model A). With increasing granularity of drug definition, these estimates were further abrogated. This is particularly notable when the categorical total drug exposure

variable (Appendix Table 6, Models C1) is separated into FAD versus non-FAD exposures (Appendix Table 6 Model C2).

Among results for exclusive single and double FAD exposures (Appendix Tables 7 and Figure 2A and Appendix Table 8 and Figure 2B). For women only one FAD (muscle relaxers) and 44 combinations in women did not achieve False Discovery Rate significant fracture risk. Among men, 5 single FAD exposures (muscle relaxers, tricyclic antidepressants, central acting antihypertensives, 1<sup>st</sup> generation antihistamines and barbiturates) and 53 double FAD exposures did not achieve False Discovery Rate significance.

**Competing Risk Analysis.** Cox model results for FAD and non-FAD exposure were slightly higher than results from subdistribution hazard ratios and nearly identical to cause-specific hazard ratio models (Technical Appendix Table 3). Models for single and combination FAD exposures were also run using the subdistribution and cause-specific hazard ratio; results were similar to those obtained from Cox models (data provided upon request).

**Technical Appendix Table 1. Ultimate Parent First Databank Enhanced Therapeutic Classification Names for the most commonly received non-FAD groups in a 20% Study Cohort, 2006-2014.**

Cardiovascular Therapy Agents  
Analgesic, Anti-inflammatory or Antipyretic  
Endocrine  
Anti-Infective Agents  
Vaccines  
Respiratory Therapy Agents  
Gastrointestinal Therapy Agents  
Electrolyte Balance-Nutritional Products  
Genitourinary Therapy



| Technical Appendix Table 2a. Person Years Exposure and Crude Fracture Rate Associated with Fracture Associated Drugs (FADs) and Non-FADs Across Age Strata in Women |                 |                                                      |           |       |       |                                                      |           |           |       |       |
|---------------------------------------------------------------------------------------------------------------------------------------------------------------------|-----------------|------------------------------------------------------|-----------|-------|-------|------------------------------------------------------|-----------|-----------|-------|-------|
| Fracture Associated Drug (FAD) Exposure                                                                                                                             |                 |                                                      |           |       |       | Other Drug (Non-FAD) Exposure                        |           |           |       |       |
|                                                                                                                                                                     |                 | Crude Fracture Rate (FX/1000 PY) % Total PY Exposure |           |       |       | Crude Fracture Rate (FX/1000 PY) % Total PY Exposure |           |           |       |       |
|                                                                                                                                                                     |                 | FX                                                   | PY        |       |       | FX                                                   | PY        |           |       |       |
| <b>Total</b>                                                                                                                                                        |                 | 47,387                                               | 7,126,267 | 6.65  |       | 47,387                                               | 7,126,267 | 6.65      |       |       |
| n=1,615,613                                                                                                                                                         | <b>0 Drugs</b>  | 12,299                                               | 3,680,607 | 3.34  | 51.65 | <b>0 Drugs</b>                                       | 8,419     | 1,896,251 | 4.44  | 26.61 |
|                                                                                                                                                                     | <b>1 Drug</b>   | 11,823                                               | 1,827,305 | 6.47  | 25.64 | <b>1 Drug</b>                                        | 7,553     | 1,227,066 | 6.16  | 17.22 |
|                                                                                                                                                                     | <b>2 Drugs</b>  | 9,471                                                | 912,855   | 10.38 | 12.81 | <b>2 Drugs</b>                                       | 8,870     | 1,305,244 | 6.80  | 18.32 |
|                                                                                                                                                                     | <b>3+ Drugs</b> | 13,794                                               | 705,500   | 19.55 | 9.90  | <b>3+ Drugs</b>                                      | 22,545    | 2,697,706 | 8.36  | 37.86 |
| <b>67-69</b>                                                                                                                                                        |                 | 6,422                                                | 2,719,708 | 2.36  |       | 6,422                                                | 2,719,708 | 2.36      |       |       |
| n=326,256                                                                                                                                                           | <b>0 Drugs</b>  | 1427                                                 | 1,443,036 | 0.99  | 53.06 | <b>0 Drugs</b>                                       | 1030      | 694846    | 1.48  | 25.55 |
|                                                                                                                                                                     | <b>1 Drug</b>   | 1391                                                 | 675,794   | 2.06  | 24.85 | <b>1 Drug</b>                                        | 1028      | 517876.8  | 1.99  | 19.04 |
|                                                                                                                                                                     | <b>2 Drugs</b>  | 1192                                                 | 331,825   | 3.59  | 12.20 | <b>2 Drugs</b>                                       | 1074      | 509339.8  | 2.11  | 18.73 |
|                                                                                                                                                                     | <b>3+ Drugs</b> | 2412                                                 | 269053.4  | 8.96  | 9.89  | <b>3+ Drugs</b>                                      | 3290      | 997644.9  | 3.30  | 36.68 |
| <b>70-74</b>                                                                                                                                                        |                 | 7,183                                                | 1,725,284 | 4.16  |       | 7,183                                                | 1,725,284 | 4.16      |       |       |
| n=436,790                                                                                                                                                           | <b>0 Drugs</b>  | 1831                                                 | 889718.7  | 2.06  | 51.57 | <b>0 Drugs</b>                                       | 1250      | 479871.3  | 2.60  | 27.81 |
|                                                                                                                                                                     | <b>1 Drug</b>   | 1674                                                 | 450499    | 3.72  | 26.11 | <b>1 Drug</b>                                        | 1063      | 290328    | 3.66  | 16.83 |
|                                                                                                                                                                     | <b>2 Drugs</b>  | 1390                                                 | 220097.3  | 6.32  | 12.76 | <b>2 Drugs</b>                                       | 1276      | 309557.7  | 4.12  | 17.94 |
|                                                                                                                                                                     | <b>3+ Drugs</b> | 2288                                                 | 164969.1  | 13.87 | 9.56  | <b>3+ Drugs</b>                                      | 3594      | 645527.1  | 5.57  | 37.42 |
| <b>75-79</b>                                                                                                                                                        |                 | 9,937                                                | 1,299,459 | 7.65  |       | 9,937                                                | 1,299,459 | 7.65      |       |       |
| n=322,991                                                                                                                                                           | <b>0 Drugs</b>  | 2536                                                 | 650903.6  | 3.90  | 50.09 | <b>0 Drugs</b>                                       | 1716      | 343245.5  | 5.00  | 26.41 |
|                                                                                                                                                                     | <b>1 Drug</b>   | 2494                                                 | 348411    | 7.16  | 26.81 | <b>1 Drug</b>                                        | 1528      | 206402.5  | 7.40  | 15.88 |
|                                                                                                                                                                     | <b>2 Drugs</b>  | 2005                                                 | 172601.6  | 11.62 | 13.28 | <b>2 Drugs</b>                                       | 1824      | 236420.9  | 7.72  | 18.19 |
|                                                                                                                                                                     | <b>3+ Drugs</b> | 2902                                                 | 127543.2  | 22.75 | 9.82  | <b>3+ Drugs</b>                                      | 4869      | 513390.4  | 9.48  | 39.51 |
| <b>80-84</b>                                                                                                                                                        |                 | 11,282                                               | 830,290   | 13.59 |       | 11,282                                               | 830,290   | 13.59     |       |       |
| n=243,570                                                                                                                                                           | <b>0 Drugs</b>  | 2944                                                 | 410550.3  | 7.17  | 49.45 | <b>0 Drugs</b>                                       | 1918      | 216936.8  | 8.84  | 26.13 |
|                                                                                                                                                                     | <b>1 Drug</b>   | 2953                                                 | 219526.9  | 13.45 | 26.44 | <b>1 Drug</b>                                        | 1781      | 127518.9  | 13.97 | 15.36 |
|                                                                                                                                                                     | <b>2 Drugs</b>  | 2310                                                 | 114487.1  | 20.18 | 13.79 | <b>2 Drugs</b>                                       | 2197      | 150837.7  | 14.57 | 18.17 |
|                                                                                                                                                                     | <b>3+ Drugs</b> | 3075                                                 | 85725.3   | 35.87 | 10.32 | <b>3+ Drugs</b>                                      | 5386      | 334996.2  | 16.08 | 40.35 |
| <b>85+</b>                                                                                                                                                          |                 | 12,563                                               | 551,526   | 22.78 |       | 12,563                                               | 551,526   | 22.78     |       |       |
| n=287,663                                                                                                                                                           | <b>0 Drugs</b>  | 3561                                                 | 286397.4  | 12.43 | 51.93 | <b>0 Drugs</b>                                       | 2505      | 161351.3  | 15.53 | 29.26 |
|                                                                                                                                                                     | <b>1 Drug</b>   | 3311                                                 | 133074.3  | 24.88 | 24.13 | <b>1 Drug</b>                                        | 2153      | 84940.01  | 25.35 | 15.40 |
|                                                                                                                                                                     | <b>2 Drugs</b>  | 2574                                                 | 73844.7   | 34.86 | 13.39 | <b>2 Drugs</b>                                       | 2499      | 99087.56  | 25.22 | 17.97 |
|                                                                                                                                                                     | <b>3+ Drugs</b> | 3117                                                 | 58209.47  | 53.55 | 10.55 | <b>3+ Drugs</b>                                      | 5406      | 206147.1  | 26.22 | 37.38 |

**Technical Appendix Table 2b. Person Years Exposure and Crude Fracture Rate Associated with Fracture Associated Drugs (FADs) and Non-FADs Across Age Strata in Men**

|              | Fracture Associated Drug (FAD) Exposure |        |           |                                                      |                     | Other Drug (Non-FAD) Exposure |           |           |                                                      |                     |
|--------------|-----------------------------------------|--------|-----------|------------------------------------------------------|---------------------|-------------------------------|-----------|-----------|------------------------------------------------------|---------------------|
|              |                                         | FX     | PY        | Crude Fracture Rate (FX/1000 PY) % Total PY Exposure |                     |                               | FX        | PY        | Crude Fracture Rate (FX/1000 PY) % Total PY Exposure |                     |
|              |                                         |        |           | Rate (FX/1000 PY)                                    | % Total PY Exposure |                               |           |           | Rate (FX/1000 PY)                                    | % Total PY Exposure |
| <b>Total</b> |                                         | 12,317 | 4,160,502 | 2.96                                                 |                     | 12,317                        | 4,160,502 | 2.96      |                                                      |                     |
| n=1,030,642  | <b>0 Drugs</b>                          | 3,616  | 2,502,076 | 1.45                                                 | 60.14               | <b>0 Drugs</b>                | 2,376     | 1,187,243 | 2.00                                                 | 28.54               |
|              | <b>1 Drug</b>                           | 3,150  | 999,979   | 3.15                                                 | 24.04               | <b>1 Drug</b>                 | 1,676     | 613,447   | 2.73                                                 | 14.74               |
|              | <b>2 Drugs</b>                          | 2,435  | 409,441   | 5.95                                                 | 9.84                | <b>2 Drugs</b>                | 2,087     | 692,737   | 3.01                                                 | 16.65               |
|              | <b>3+ Drugs</b>                         | 3,116  | 249,006   | 12.51                                                | 5.98                | <b>3+ Drugs</b>               | 6,178     | 1,667,075 | 3.71                                                 | 40.07               |
| <b>67-69</b> |                                         | 2,531  | 1,878,320 | 1.35                                                 |                     | 2,531                         | 1,878,320 | 1.35      |                                                      |                     |
| n=249,638    | <b>0 Drugs</b>                          | 706    | 1139329   | 1.31                                                 | 60.66               | <b>0 Drugs</b>                | 485       | 491861.7  | 0.99                                                 | 26.19               |
|              | <b>1 Drug</b>                           | 577    | 444999.6  | 3.17                                                 | 23.69               | <b>1 Drug</b>                 | 354       | 298599    | 1.19                                                 | 15.90               |
|              | <b>2 Drugs</b>                          | 458    | 180312.6  | 6.64                                                 | 9.60                | <b>2 Drugs</b>                | 422       | 328196.7  | 1.29                                                 | 17.47               |
|              | <b>3+ Drugs</b>                         | 790    | 113679.1  | 18.93                                                | 6.05                | <b>3+ Drugs</b>               | 1270      | 759662.8  | 1.67                                                 | 40.44               |
| <b>70-74</b> |                                         | 2,300  | 1,090,187 | 2.11                                                 |                     | 2,300                         | 1,090,187 | 2.11      |                                                      |                     |
| n=326,887    | <b>0 Drugs</b>                          | 715    | 658340.3  | 0.85                                                 | 60.39               | <b>0 Drugs</b>                | 463       | 329396.8  | 1.41                                                 | 30.21               |
|              | <b>1 Drug</b>                           | 561    | 265664.5  | 1.63                                                 | 24.37               | <b>1 Drug</b>                 | 299       | 154448    | 1.94                                                 | 14.17               |
|              | <b>2 Drugs</b>                          | 438    | 105151.6  | 3.27                                                 | 9.65                | <b>2 Drugs</b>                | 367       | 176504.4  | 2.08                                                 | 16.19               |
|              | <b>3+ Drugs</b>                         | 586    | 61030.19  | 7.63                                                 | 5.60                | <b>3+ Drugs</b>               | 1171      | 429837.4  | 2.72                                                 | 39.43               |
| <b>75-79</b> |                                         | 2,639  | 674,997   | 3.91                                                 |                     | 2,639                         | 674,997   | 3.91      |                                                      |                     |
| n=217,042    | <b>0 Drugs</b>                          | 784    | 398421.6  | 1.15                                                 | 59.03               | <b>0 Drugs</b>                | 479       | 201267.3  | 2.38                                                 | 29.82               |
|              | <b>1 Drug</b>                           | 679    | 167432.7  | 2.08                                                 | 24.80               | <b>1 Drug</b>                 | 347       | 91274.39  | 3.80                                                 | 13.52               |
|              | <b>2 Drugs</b>                          | 536    | 68866.2   | 4.13                                                 | 10.20               | <b>2 Drugs</b>                | 427       | 108058.4  | 3.95                                                 | 16.01               |
|              | <b>3+ Drugs</b>                         | 640    | 40276.53  | 9.41                                                 | 5.97                | <b>3+ Drugs</b>               | 1386      | 274,397   | 5.05                                                 | 40.65               |
| <b>80-84</b> |                                         | 2,465  | 345,945   | 7.13                                                 |                     | 2,465                         | 345,945   | 7.13      |                                                      |                     |
| n=133,943    | <b>0 Drugs</b>                          | 707    | 203721.5  | 1.97                                                 | 58.89               | <b>0 Drugs</b>                | 464       | 107294.4  | 4.32                                                 | 31.01               |
|              | <b>1 Drug</b>                           | 683    | 83304.37  | 4.17                                                 | 24.08               | <b>1 Drug</b>                 | 326       | 46158.46  | 7.06                                                 | 13.34               |
|              | <b>2 Drugs</b>                          | 501    | 36745.19  | 7.33                                                 | 10.62               | <b>2 Drugs</b>                | 420       | 53938.43  | 7.79                                                 | 15.59               |
|              | <b>3+ Drugs</b>                         | 574    | 22173.67  | 14.76                                                | 6.41                | <b>3+ Drugs</b>               | 1255      | 138553.5  | 9.06                                                 | 40.05               |
| <b>85+</b>   |                                         | 2,382  | 171,053   | 13.93                                                |                     | 2,382                         | 171,053   | 13.93     |                                                      |                     |
| n=109,148    | <b>0 Drugs</b>                          | 704    | 102263.9  | 3.12                                                 | 59.78               | <b>0 Drugs</b>                | 485       | 57422.4   | 8.45                                                 | 33.57               |
|              | <b>1 Drug</b>                           | 650    | 38577.73  | 7.44                                                 | 22.55               | <b>1 Drug</b>                 | 350       | 22967.26  | 15.24                                                | 13.43               |
|              | <b>2 Drugs</b>                          | 502    | 18365.61  | 12.63                                                | 10.74               | <b>2 Drugs</b>                | 451       | 26039.19  | 17.32                                                | 15.22               |
|              | <b>3+ Drugs</b>                         | 526    | 11845.73  | 44.40                                                | 6.93                | <b>3+ Drugs</b>               | 1096      | 64624.15  | 16.96                                                | 37.78               |

FAD is fracture associated drug group. Non-FADs are all other prescription drug groups. PY is Person Year. 3+ FAD is a classification of person days with 3 or more concurrent FADs. Frequencies of exposure categories are derived from person-day level data. For FADs, status of receipt of 21 single drugs (1 FAD) and 210 concurrent drug pairs (2 FAD) is classified for each person, for each day of observation. The same approach was taken to identify non-FAD exposures; status of receipt of any 1 non-FAD exposure (1 Non-FAD), 2 concurrent non-FAD exposures (2 Non-FAD), 3+ Non-FAD is a classification of person days with 3 or more concurrent Non-FADs.

**Technical Appendix Table 3. Cox Regression Models (Figure 1A) and, for comparison, Competing Risk Models with Sub Distribution or Cause Specific Hazard Ratio Estimates Demonstrating Hip-Fracture Risk Associated with Exposure to prescription FADs and Non-FADs**

|                                                   | Cox Model Fracture |                               |                                | Competing Risk (SHR)                |                               |                                | Competing Risk (CSH)              |                               |                                |
|---------------------------------------------------|--------------------|-------------------------------|--------------------------------|-------------------------------------|-------------------------------|--------------------------------|-----------------------------------|-------------------------------|--------------------------------|
|                                                   | Hazard Ratio (HR)  | Lower 95% Confidence Interval | Higher 95% Confidence Interval | Sub Distribution Hazard Ratio (SHR) | Lower 95% Confidence Interval | Higher 95% Confidence Interval | Cause-Specific Hazard Ratio (CHR) | Lower 95% Confidence Interval | Higher 95% Confidence Interval |
| <b>Women (Fracture = 47,318; Death n=157,807)</b> |                    |                               |                                |                                     |                               |                                |                                   |                               |                                |
| <b>0 FAD</b>                                      | 1.00               |                               |                                | 1.00                                |                               |                                | 1.00                              |                               |                                |
| <b>1 FAD</b>                                      | 2.04               | 1.99                          | 2.11                           | 2.00                                | 1.94                          | 2.06                           | 2.04                              | 1.98                          | 2.11                           |
| <b>2 FAD</b>                                      | 2.86               | 2.77                          | 2.95                           | 2.76                                | 2.66                          | 2.85                           | 2.86                              | 2.76                          | 2.96                           |
| <b>3+ FAD</b>                                     | 4.50               | 4.36                          | 4.65                           | 4.17                                | 4.02                          | 4.32                           | 4.50                              | 4.34                          | 4.67                           |
| <b>0 Non-FAD</b>                                  | 1.00               |                               |                                | 1.00                                |                               |                                | 1.00                              |                               |                                |
| <b>1 Non-FAD</b>                                  | 0.93               | 0.90                          | 0.96                           | 0.94                                | 0.91                          | 0.97                           | 0.93                              | 0.90                          | 0.96                           |
| <b>2 Non-FAD</b>                                  | 0.84               | 0.81                          | 0.87                           | 0.85                                | 0.83                          | 0.88                           | 0.84                              | 0.81                          | 0.87                           |
| <b>3+ Non-FAD</b>                                 | 0.74               | 0.72                          | 0.77                           | 0.76                                | 0.74                          | 0.78                           | 0.74                              | 0.72                          | 0.77                           |
| <b>Men (Fracture = 12,299; Death = 98,927)</b>    |                    |                               |                                |                                     |                               |                                |                                   |                               |                                |
| <b>0 FAD</b>                                      | 1.00               |                               |                                | 1.00                                |                               |                                | 1.00                              |                               |                                |
| <b>1 FAD</b>                                      | 2.23               | 2.11                          | 2.36                           | 2.17                                | 2.05                          | 2.30                           | 2.23                              | 2.10                          | 2.36                           |
| <b>2 FAD</b>                                      | 3.40               | 3.20                          | 3.61                           | 3.22                                | 3.02                          | 3.43                           | 3.39                              | 3.18                          | 3.62                           |
| <b>3+ FAD</b>                                     | 5.18               | 4.87                          | 5.52                           | 4.60                                | 4.30                          | 4.92                           | 5.17                              | 4.83                          | 5.54                           |
| <b>0 Non-FAD</b>                                  | 1.00               |                               |                                | 1.00                                |                               |                                | 1.00                              |                               |                                |
| <b>1 Non-FAD</b>                                  | 0.90               | 0.84                          | 0.96                           | 0.91                                | 0.85                          | 0.98                           | 0.90                              | 0.84                          | 0.96                           |
| <b>2 Non-FAD</b>                                  | 0.84               | 0.79                          | 0.89                           | 0.86                                | 0.81                          | 0.92                           | 0.84                              | 0.79                          | 0.89                           |
| <b>3+ Non-FAD</b>                                 | 0.71               | 0.67                          | 0.75                           | 0.73                                | 0.69                          | 0.78                           | 0.71                              | 0.67                          | 0.75                           |

Total person years of observation = 7,126,266 for women, 4,160,502 for men. For FADs, status of receipt of 21 single drugs (1 FAD) and 210 concurrent drug pairs (2 FAD) is classified for each person, for each day of observation. 3+ FAD is a classification of person days with 3 or more concurrent FADs. The same approach was taken to identify 552 non-FAD exposures; status of receipt of any 1 non-FAD exposure (1 Non-FAD), 2 concurrent non-FAD exposures (2 Non-FAD), 3+ Non-FAD is a classification of person days with 3 or more concurrent Non-FADs. All models were stratified on sex and adjusted for time varying patient factors; Medicaid eligibility and Medicare Part D low income subsidy are two poverty indicators. Long-term care indicator is defined as 50% or more annual prescription fills dispensed by a long-term care pharmacy. The three categories of drugs protective of fracture are: 1. osteoporosis treatments: oral and injected bisphosphonates, calcitonin, denosumab, parathyroid hormone, 2. Estrogens- systemic estrogens, selective estrogen receptor modulators, and 3. beta-blockers. The "Tobacco/Chronic Obstructive Lung Disease" co-morbidity includes patients with Chronic Obstructive Lung Disease diagnosis and/or tobacco use diagnosis.

## eAppendix References

1. Munson JC, Bynum JP, Bell JE, et al. Patterns of prescription drug use before and after fragility fracture. *JAMA Internal Medicine* 2016;176:1531-8.
2. Benjamini Y, Hochberg Y. Controlling the False Discovery Rate: A Practical and Powerful Approach to Multiple Testing. *Journal of the Royal Statistical Society Series B (Methodological)* 1995;57:289-300.
3. Glickman ME, Rao SR, Schultz MR. False discovery rate control is a recommended alternative to Bonferroni-type adjustments in health studies. *J Clin Epidemiol* 2014;67:850-7.
4. Avorn J. In defense of pharmacoepidemiology--embracing the yin and yang of drug research. *N Engl J Med* 2007;357:2219-21.
5. Vandembroucke JP. When are observational studies as credible as randomised trials? *Lancet* 2004;363:1728-31.
6. Scott IA, Hilmer SN, Reeve E, et al. Reducing inappropriate polypharmacy: the process of deprescribing. *JAMA Intern Med* 2015;175:827-34.
7. Hosmer DWL, S.; May, S. Appendix 2: An Introduction to the Counting Process Approach to Survival Analysis. *Applied Survival Analysis*.
8. Andersen PK, Gill RD. Cox's Regression Model for Counting Processes: A Large Sample Study. *Ann Statist* 1982;10:1100-20.
9. Austin PC, Fine JP. Practical recommendations for reporting Fine-Gray model analyses for competing risk data. *Statistics in Medicine* 2017;36:4391-400.
10. Fine JP, Gray RJ. A Proportional Hazards Model for the Subdistribution of a Competing Risk. *Journal of the American Statistical Association* 1999;94:496-509.
11. Pope GC, Kautter J, Ellis RP, et al. Risk adjustment of Medicare capitation payments using the CMS-HCC model. *Health Care Financ Rev* 2004;25:119-41.
12. Risk Adjustment. 2019. at <https://www.cms.gov/medicare/health-plans/medicareadvtspeccratestats/risk-adjustors.html>.)

**eFigure 1. Cohort Creation Diagram**

Cohort inclusion criteria: U.S. ZIP Code, 24 months or more of fee-for-service Medicare Parts A and B enrollment prior to the start of Part D drug receipt observation period, continuous enrollment in fee for service Medicare Parts A, B, and D for at least 12 months between 2006-2014, alive at least 12 months after start of Part D drug use observation.

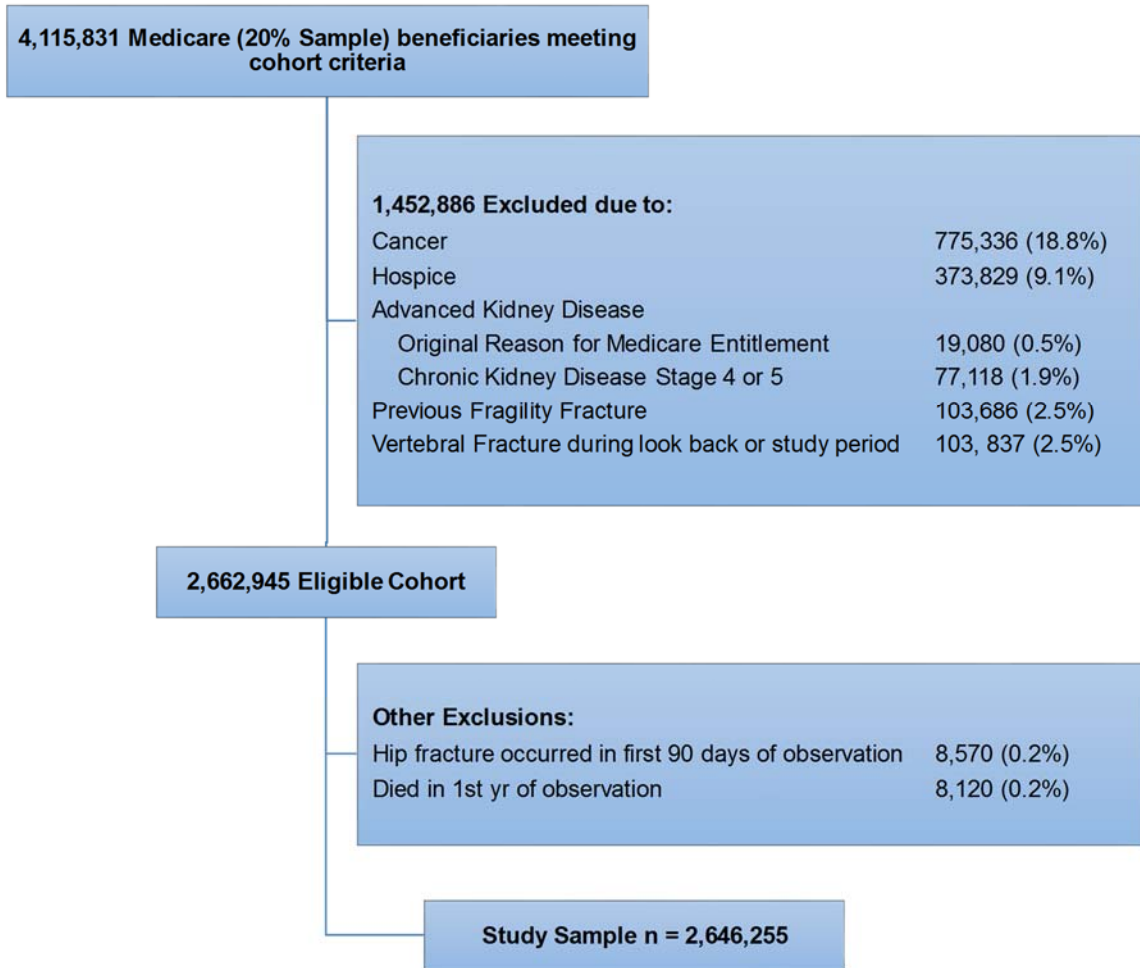

**eFigure 2.** Total and Age-Group Specific Crude Fracture Rates Among Women and Men Exposed to FADs and Non-FADs

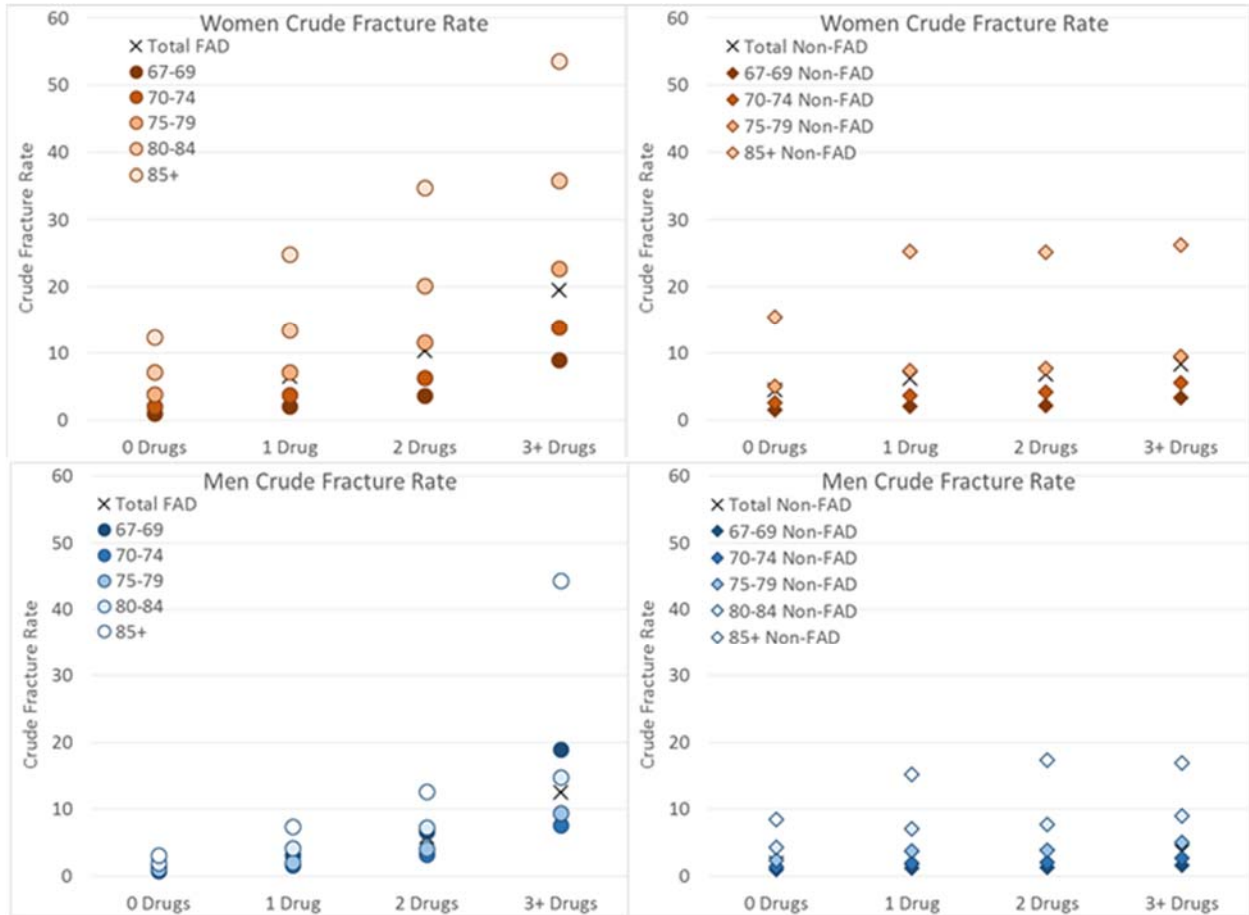

Total is crude rate for women or men exposed to FAD or non-FAD, regardless of age group.

**eTable 1.** Select Literature Summary, Mechanisms Through Which Drugs Confer Fracture Risk

| Potential Mechanism of Increased Fracture Risk                                                                                                                                                                                                                                                                                                                                                                                                                                                                                                          | Drug Class                                                        |
|---------------------------------------------------------------------------------------------------------------------------------------------------------------------------------------------------------------------------------------------------------------------------------------------------------------------------------------------------------------------------------------------------------------------------------------------------------------------------------------------------------------------------------------------------------|-------------------------------------------------------------------|
| Direct skeletal cell effects (on either osteoclasts (bone resorption) or osteoblasts and osteocytes (bone formation)) : <ul style="list-style-type: none"> <li>· via 25-hydroxylase enzyme inhibition and decreased vitamin D</li> <li>· Folic acid depletion and hyperhomocysteinemia</li> <li>· Decrease serum calcium (increase excretion, decrease absorption, unknown mechanism)</li> <li>· Hypogonadism (aromatase enzyme inhibition, hyperprolactinemia, suppression of hypothalamic, pituitary-gonadal axis)</li> <li>· hypoglycemia</li> </ul> | Anticonvulsants <sup>1-10</sup>                                   |
|                                                                                                                                                                                                                                                                                                                                                                                                                                                                                                                                                         | <b>Antihistamines (H1 Blockers)<sup>11,12</sup></b>               |
|                                                                                                                                                                                                                                                                                                                                                                                                                                                                                                                                                         | <b>Antipsychotics (1st and 2nd generation)<sup>13-17</sup></b>    |
|                                                                                                                                                                                                                                                                                                                                                                                                                                                                                                                                                         | Glucocorticoids <sup>18-23</sup>                                  |
|                                                                                                                                                                                                                                                                                                                                                                                                                                                                                                                                                         | <b>Histamine 2 Receptor Antagonists<sup>11,12,24</sup></b>        |
|                                                                                                                                                                                                                                                                                                                                                                                                                                                                                                                                                         | <b>Loop diuretics<sup>25-28</sup></b>                             |
|                                                                                                                                                                                                                                                                                                                                                                                                                                                                                                                                                         | Nitrates <sup>26,29,30</sup>                                      |
|                                                                                                                                                                                                                                                                                                                                                                                                                                                                                                                                                         | Proton pump inhibitors <sup>24,31-36</sup>                        |
|                                                                                                                                                                                                                                                                                                                                                                                                                                                                                                                                                         | <b>Opioids<sup>37,38</sup></b>                                    |
|                                                                                                                                                                                                                                                                                                                                                                                                                                                                                                                                                         | <b>Selective serotonin reuptake inhibitors<sup>39-48</sup></b>    |
|                                                                                                                                                                                                                                                                                                                                                                                                                                                                                                                                                         | <b>Thiazide Diuretics<sup>49-51</sup></b>                         |
|                                                                                                                                                                                                                                                                                                                                                                                                                                                                                                                                                         | Thiazolidinediones <sup>52,53</sup>                               |
|                                                                                                                                                                                                                                                                                                                                                                                                                                                                                                                                                         | <b>Tricyclic antidepressants<sup>54</sup></b>                     |
| Increase fall risk <ul style="list-style-type: none"> <li>· Sedation/Dizziness/Anticholinergic</li> <li>· Orthostatic hypotension</li> </ul>                                                                                                                                                                                                                                                                                                                                                                                                            | <b>Antihistamines (H1 Blockers)<sup>55</sup></b>                  |
|                                                                                                                                                                                                                                                                                                                                                                                                                                                                                                                                                         | AntiParkinson'sAgents <sup>56</sup>                               |
|                                                                                                                                                                                                                                                                                                                                                                                                                                                                                                                                                         | <b>Antipsychotics (1st and 2nd generation)<sup>57-61</sup></b>    |
|                                                                                                                                                                                                                                                                                                                                                                                                                                                                                                                                                         | Barbiturates <sup>62</sup>                                        |
|                                                                                                                                                                                                                                                                                                                                                                                                                                                                                                                                                         | Benzodiazepines <sup>58,61,63,64</sup>                            |
|                                                                                                                                                                                                                                                                                                                                                                                                                                                                                                                                                         | Centrally-acting antihypertensives <sup>65</sup>                  |
|                                                                                                                                                                                                                                                                                                                                                                                                                                                                                                                                                         | <b>Histamine 2 Receptor Antagonists<sup>24</sup></b>              |
|                                                                                                                                                                                                                                                                                                                                                                                                                                                                                                                                                         | <b>Loop diuretics<sup>66</sup></b>                                |
|                                                                                                                                                                                                                                                                                                                                                                                                                                                                                                                                                         | Muscle Relaxers <sup>67-69</sup>                                  |
|                                                                                                                                                                                                                                                                                                                                                                                                                                                                                                                                                         | Non-Benzodiazepine Sedative Hypnotics <sup>57,58,61</sup>         |
|                                                                                                                                                                                                                                                                                                                                                                                                                                                                                                                                                         | <b>Opioids<sup>37,38,70</sup></b>                                 |
|                                                                                                                                                                                                                                                                                                                                                                                                                                                                                                                                                         | <b>Selective serotonin reuptake inhibitors<sup>57,58,71</sup></b> |
|                                                                                                                                                                                                                                                                                                                                                                                                                                                                                                                                                         | <b>Thiazide Diuretics<sup>49-51</sup></b>                         |
| <b>Tricyclic antidepressants<sup>57,58,61,71</sup></b>                                                                                                                                                                                                                                                                                                                                                                                                                                                                                                  |                                                                   |
| Increase fall risk <ul style="list-style-type: none"> <li>· Decrease muscle mass</li> </ul>                                                                                                                                                                                                                                                                                                                                                                                                                                                             | Glucocorticoids <sup>19</sup>                                     |

Bold font indicates drug groups that have been associated with both risk of falls and bone weakening.

## Literature

- Arora E, Singh H, Gupta YK. Impact of antiepileptic drugs on bone health: Need for monitoring, treatment, and prevention strategies. *Journal of Family Medicine and Primary Care* 2016;5:248-53.
- Hosseinpour F, Elifolk M, Norlin M, Wlivaik K. Phenobarbital suppresses vitamin D3 25-hydroxylase expression: a potential new mechanism for drug-induced osteomalacia. *Biochem Biophys Res Commun* 2007;357:603-7.
- Teagarden DL, Meador J, Loring DW. Low Vitamin D Levels Are Common in Patients with Epilepsy. *Epilepsy research* 2014;108:1352-6.
- Khanna S, Pillai KK, Yohora D. Insights into liaison between antiepileptic drugs and bone. *Drug Discov Today* 2009;14:428-35.
- Pack AM. Treatment of epilepsy to optimize bone health. *Curr Treat Options Neurol* 2011;13:346-54.
- Pack AM, Morrell MJ. Adverse effects of antiepileptic drugs on bone structure: epidemiology, mechanisms and therapeutic implications. *CNS Drugs* 2001;15:633-42.
- Fan H-C, Lee H-S, Chang K-P, et al. The Impact of Anti-Epileptic Drugs on Growth and Bone Metabolism. *International Journal of Molecular Sciences* 2016;17:1242.
- Feldkamp J, Becker A, Witte OW, Scharff D, Scherbaum WA. Long-term anticonvulsant therapy leads to low bone mineral density—evidence for direct drug effects of phenytoin and carbamazepine on human osteoblast-like cells. *Exp Clin Endocrinol Diabetes* 2000;108:37-43.
- Jacobsen NW, Halling-Sorensen B, Birkved FK. Inhibition of human aromatase complex (CYP19) by antiepileptic drugs. *Toxicol In Vitro* 2008;22:146-53.
- Weinstein RS, Bryce GF, Sappington LJ, King DW, Gallagher BB. Decreased serum ionized calcium and normal vitamin D metabolite levels with anticonvulsant drug treatment. *J Clin Endocrinol Metab* 1984;58:1003-9.
- Ezzat BA, Abbass MM. The ability of H1 or H2 receptor antagonists or their combination in counteracting the glucocorticoid-induced alveolar bone loss in rats. *J Oral Pathol Med* 2014;43:148-56.
- Kinjo M, Setoguchi S, Solomon DH. Anti-histamine Therapy and Bone Mineral Density: Analysis in a Population-Based U.S. Sample. *The American journal of medicine* 2008;121:1085-91.
- Meaney AM, Smith S, Howes OD, O'Brien M, Murray RM, O'Keane V. Effects of long-term prolactin-raising antipsychotic medication on bone mineral density in patients with schizophrenia. *Br J Psychiatry* 2004;184:503-8.
- Chen C-Y, Lane H-Y, Lin C-H. Effects of Antipsychotics on Bone Mineral Density in Patients with Schizophrenia: Gender Differences. *Clinical Psychopharmacology and Neuroscience* 2016;14:238-49.
- Naidoo U, Goff DC, Klibanski A. Hyperprolactinemia and bone mineral density: the potential impact of antipsychotic agents. *Psychoneuroendocrinology* 2003;28 Suppl 2:97-108.
- Tseng PT, Chen YW, Yeh PY, Tu KY, Cheng YS, Wu CK. Bone Mineral Density in Schizophrenia: An Update of Current Meta-Analysis and Literature Review Under Guideline of PRISMA. *Medicine* 2015;94:e1967.
- Costa JL, Smith G, Watson M, et al. The atypical anti-psychotic clozapine decreases bone mass in rats in vivo. *Schizophr Res* 2011;126:291-7.
- O'Brien CA, Jia D, Plotkin LJ, et al. Glucocorticoids act directly on osteoblasts and osteocytes to induce their apoptosis and reduce bone formation and strength. *Endocrinology* 2004;145:1835-41.
- Güler-Yüksel M, Hoes JN, Bultink IEM, Lems WF. Glucocorticoids, Inflammation and Bone. *Calcified Tissue International* 2018.
- Yao W, Cheng Z, Busse C, Pham A, Nakamura MG, Lane NE. Glucocorticoid Excess in Mice Results in Early Activation of Osteoclastogenesis and Adipogenesis and Prolonged Suppression of Osteogenesis: A Longitudinal Study of Gene Expression in Bone Tissue From Glucocorticoid-Treated Mice. *Arthritis and rheumatism* 2008;58:1674-86.
- Chee C, Sellaheva L, Pappachan JM. Inhaled Corticosteroids and Bone Health. *The Open Respiratory Medicine Journal* 2014;8:85-92.
- Weinstein RS. Glucocorticoid-induced osteoporosis and osteonecrosis. *Endocrinol Metab Clin North Am* 2012;41:595-611.
- Weinstein RS, Jilka RL, Parfitt AM, Manolagas SC. Inhibition of osteoblastogenesis and promotion of apoptosis of osteoblasts and osteocytes by glucocorticoids. Potential mechanisms of their deleterious effects on bone. *J Clin Invest* 1998;102:274-82.
- Eom C-S, Park SM, Myung S-K, Yun JM, Ahn J-S. Use of acid-suppressive drugs and risk of fracture: a meta-analysis of observational studies. *Ann Fam Med* 2011;9:257-67.
- Rejmark L, Vestergaard P, Heickendorff L, Andreassen F, Mosekilde L. Loop diuretics increase bone turnover and decrease BMD in osteopenic postmenopausal women: results from a randomized controlled study with bumetanide. *J Bone Miner Res* 2006;21:163-70.
- Ghosh M, Majumdar SR. Antihypertensive medications, bone mineral density, and fractures: a review of old cardiac drugs that provides new insights into osteoporosis. *Endocrine* 2014;46:397-405.
- Lim LS, Fink HA, Blackwell T, Taylor BC, Ensrud KE. Loop diuretic use and rates of hip bone loss and risk of falls and fractures in older women. *J Am Geriatr Soc* 2009;57:855-62.
- Rejmark L, Vestergaard P, Mosekilde L. Fracture risk in patients treated with loop diuretics. *J Intern Med* 2006;259:117-24.
- Jamal SA, Reid LS, Hamilton CJ. The effects of organic nitrates on osteoporosis: a systematic review. *Osteoporos Int* 2013;24:763-70.
- Golchin N, Hohensee C, LaCroix A, Gray SL. Nitrate Medications, Fractures, and Change in Bone Mineral Density in Postmenopausal Women: Results from the Women's Health Initiative. *Journal of Bone and Mineral Research* 2016;31:1760-6.
- O'Connell MB, Madden DM, Murray AM, Heaney RP, Kerzner LJ. Effects of proton pump inhibitors on calcium carbonate absorption in women: a randomized crossover trial. *Am J Med* 2005;118:778-81.
- Eom C-S, Park SM, Myung S-K, Yun JM, Ahn J-S. Use of Acid-Suppressive Drugs and Risk of Fracture: A Meta-analysis of Observational Studies. *The Annals of Family Medicine* 2011;9:257-67.
- Corley DA, Kubo A, Zhao W, Quessenberry C. Proton Pump Inhibitors and Histamine-2 Receptor Antagonists are Associated with Hip Fractures among At-Risk Patients. *Gastroenterology* 2010;139:93-101.
- Chonan O, Takahashi R, Yasui H, Watanuki M. Effect of L-lactic acid on calcium absorption in rats fed omeprazole. *J Nutr Sci Vitaminol (Tokyo)* 1998;44:473-81.
- Asaad KM, Stunes AK, Mosti MP, et al. Effects of the Histamine 1 Receptor Antagonist Cetirizine on the Osteoporotic Phenotype in H+/K+ATPase Beta Subunit KO Mice. *Journal of Cellular Biochemistry* 2016;117:2089-96.
- Jo Y, Park E, Ahn SB, et al. A Proton Pump Inhibitor's Effect on Bone Metabolism Mediated by Osteoclast Action in Old Age: A Prospective Randomized Study. *Gut and Liver* 2015;9:607-14.
- Daniell HW. Opioid osteoporosis. *Arch Intern Med* 2004;164:338; author reply 339.
- Daniell HW. DHEAS deficiency during consumption of sustained-action prescribed opioids: evidence for opioid-induced inhibition of adrenal androgen production. *J Pain* 2006;7:901-7.
- Warden SJ, Robling AG, Sanders MS, Bliziotes MM, Turner CH. Inhibition of the serotonin (5-hydroxytryptamine) transporter reduces bone accrual during growth. *Endocrinology* 2005;146:685-93.
- Warden SJ, Robling AG, Haney EM, Turner CH, Bliziotes MM. The emerging role of serotonin (5-hydroxytryptamine) in the skeleton and its mediation of the skeletal effects of low-density lipoprotein receptor-related protein 5 (LRP5). *Bone* 2010;46:4-12.
- Bliziotes M, Eshleman A, Burt-Pichat B, et al. Serotonin transporter and receptor expression in osteocytic MLO-Y4 cells. *Bone* 2006;39:1313-21.
- Bliziotes M. Update in serotonin and bone. *J Clin Endocrinol Metab* 2010;95:4124-32.
- Battaglini R, Fu J, Spate U, et al. Serotonin regulates osteoclast differentiation through its transporter. *J Bone Miner Res* 2004;19:1420-31.
- Haney EM, Chan BK, Diem SJ, et al. Association of low bone mineral density with selective serotonin reuptake inhibitor use by older men. *Arch Intern Med* 2007;167:1246-51.
- Haney EM, Warden SJ. Skeletal effects of serotonin (5-hydroxytryptamine) transporter inhibition: evidence from clinical studies. *J Musculoskelet Neuronal Interact* 2008;8:133-45.
- Haney EM, Warden SJ, Bliziotes MM. Effects of selective serotonin reuptake inhibitors on bone health in adults: time for recommendations about screening, prevention and management? *Bone* 2010;46:13-7.
- Rosen CJ. Serotonin rising—the bone, brain, bowel connection. *N Engl J Med* 2009;360:957-9.
- Jacobsen NW, Hansen CH, Nellemann C, Styrrhøve B, Halling-Sorensen B. Effects of selective serotonin reuptake inhibitors on three sex steroids in two versions of the aromatase enzyme inhibition assay and in the H295R cell assay. *Toxicol In Vitro* 2015;29:1729-35.
- Aung K, Htay T. Thiazide diuretics and the risk of hip fracture. *Cochrane Db Syst Rev* 2011.
- Xiao F, Qu X, Zhai Z, et al. Association between loop diuretic use and fracture risk. *Osteoporosis International* 2015;26:775-84.
- Xiao X, Xu Y, Wu Q. Thiazide diuretic usage and risk of fracture: a meta-analysis of cohort studies. *Osteoporosis International* 2018.
- Grey A, Bolland M, Gamble G, et al. The peroxisome proliferator-activated receptor-gamma agonist rosiglitazone decreases bone formation and bone mineral density in healthy postmenopausal women: a randomized, controlled trial. *J Clin Endocrinol Metab* 2007;92:1305-10.
- Grey A, Bolland MJ, Wattie D, Horne A, Gamble G, Reid IR. The antiresorptive effects of a single dose of zoledronate persist for two years: a randomized, placebo-controlled trial in osteopenic postmenopausal women. *J Clin Endocrinol Metab* 2009;94:538-44.
- Li X, Sun W, Li J, et al. Clozapine causes osteoporosis by promoting osteoclastogenesis via E3 ligase Itch, which is prevented by Zoledronic acid. *Scientific Reports* 2017;7:41358.
- Du Buske LM. Clinical comparison of histamine H1 receptor antagonist drugs. *Journal of Allergy and Clinical Immunology* 1996;98:5307-518.
- Whitney CM. Medications for Parkinson's disease. *Neurologist* 2007;13:387-8.
- Ray WA, Griffin MR, Schaffner W, Baugh DK, Melton LJ, 3rd. Psychotropic drug use and the risk of hip fracture. *N Engl J Med* 1987;316:363-9.
- Cumming RG. Epidemiology of medication-related falls and fractures in the elderly. *Drugs Aging* 1998;12:43-53.
- Hartikainen S, Louhevaara E, Louhevaara K. Medication as a Risk Factor for Falls: Critical Systematic Review. *J Gerontol a-Biol* 2007;62:1172-81.
- Nourian Z, Mow T, Muftic D, et al. Orthostatic hypotensive effect of antipsychotic drugs in Wistar rats by in vivo and in vitro studies of alpha1-adrenoceptor function. *Psychopharmacology (Berl)* 2008;199:15-27.
- Woolcott JC, Richardson KJ, Wiens MO, et al. Meta-analysis of the impact of 9 medication classes on falls in elderly persons. *Arch Intern Med* 2009;169:1952-60.
- Grisso JA, Kelsey JL, Strom BL, et al. Risk factors for falls as a cause of hip fracture in women. The Northeast Hip Fracture Study Group. *N Engl J Med* 1991;324:1326-31.
- Donnelly K, Bracchi R, Hewitt J, Routledge PA, Carter B. Benzodiazepines, Z-drugs and the risk of hip fracture: A systematic review and meta-analysis. *PLoS ONE* 2017;12:e0174730.
- Cumming RG, Le Couteur DG. Benzodiazepines and risk of hip fractures in older people: a review of the evidence. *CNS Drugs* 2003;17:825-37.
- Mathias CJ. Orthostatic hypotension: causes, mechanisms, and influencing factors. *Neurology* 1995;45:56-11.
- Berry SD, Mittleman MA, Zhang Y, et al. New loop diuretic prescriptions may be an acute risk factor for falls in the nursing home. *Pharmacoeconomics and Drug Safety* 2012;21:560-3.
- Alvarez CA, Mortensen EM, Makris UE, et al. Association of skeletal muscle relaxers and antihistamines on mortality, hospitalizations, and emergency department visits in elderly patients: a nationwide retrospective cohort study. *BMC Geriatrics* 2015;15:2.
- Golden AG, Ma Q, Nair V, Florez HJ, Roos BA. Risk for fractures with centrally acting muscle relaxants: an analysis of a national Medicare Advantage claims database. *Ann Pharmacother* 2010;44:1369-75.
- Witenko C, Moorman-Li R, Motycka C, et al. Considerations for the Appropriate Use of Skeletal Muscle Relaxants for the Management Of Acute Low Back Pain. *Pharmacy and Therapeutics* 2014;39:427-35.
- Guo ZC, Willis P, Viitanen M, Fastbom J, Winblad B. Cognitive Impairment, Drug Use, and the Risk of Hip Fracture in Persons over 75 Years Old: A Community-based Prospective Study. *American Journal of Epidemiology* 1998;148:887-92.
- Thapa PB, Gideon P, Cost TW, Milam AB, Ray WA. Antidepressants and the risk of falls among nursing home residents. *N Engl J Med* 1998;339:875-82.



**eTable 2. International Classification of Diseases, Ninth Revision (ICD-9) Diagnosis Codes Used to Identify Fractures and Morbidities**

|                                                             |                                                                                                                                                                                                                                                                                                                                                                                                                                                                                                                                                                                                                                                                                                                                                                                                                                                                                                                                                                                                                                                                                                                                                                                                                                                                                                                                                                                                                                                                                                                                                                                                                                                                                                                                                                                                                                                                                                                                                                                                                                                                                                                                                                                                                                                                                                                                                                                                                                                                                                                                                                                                                                                                                                                                                                                                                                                                                                                                                                                                                                                                                                                                                                                                                                                                                                                                                                                                                                                                                                                                                                                                                                                                                                                                                                                                                                                                                                                                                                                                                                                                                                                                                                                                                                                                                                                                                                                                                                                                                                                                                                                                                                                                                                                                                                                                                                                                                                                                                                                                                                                                                                                                                                                                                                                                                                                                                                                                                                                                                                                                                                                                                                                                                                                                                                                                                                                                                                                                                                                                                                                                                                                                                                                                                                                                                                                                                                                                                                                                                                                                                                                                                                                                                                                                                                                                                                                                                                                                                                                                                                                                                                                                                                                                                                                                                                                                                                                                                                                                                                                                                                                                                                                                                                                                                                                                                                                                                                                                                                                                                                                                                                                                                                                                                                                                                                                                                                                                                                                                                                                                                                                                                                                                                                                                                                                                                                                                                                                                                                                                                                                                                                                                                                                                                                       |
|-------------------------------------------------------------|---------------------------------------------------------------------------------------------------------------------------------------------------------------------------------------------------------------------------------------------------------------------------------------------------------------------------------------------------------------------------------------------------------------------------------------------------------------------------------------------------------------------------------------------------------------------------------------------------------------------------------------------------------------------------------------------------------------------------------------------------------------------------------------------------------------------------------------------------------------------------------------------------------------------------------------------------------------------------------------------------------------------------------------------------------------------------------------------------------------------------------------------------------------------------------------------------------------------------------------------------------------------------------------------------------------------------------------------------------------------------------------------------------------------------------------------------------------------------------------------------------------------------------------------------------------------------------------------------------------------------------------------------------------------------------------------------------------------------------------------------------------------------------------------------------------------------------------------------------------------------------------------------------------------------------------------------------------------------------------------------------------------------------------------------------------------------------------------------------------------------------------------------------------------------------------------------------------------------------------------------------------------------------------------------------------------------------------------------------------------------------------------------------------------------------------------------------------------------------------------------------------------------------------------------------------------------------------------------------------------------------------------------------------------------------------------------------------------------------------------------------------------------------------------------------------------------------------------------------------------------------------------------------------------------------------------------------------------------------------------------------------------------------------------------------------------------------------------------------------------------------------------------------------------------------------------------------------------------------------------------------------------------------------------------------------------------------------------------------------------------------------------------------------------------------------------------------------------------------------------------------------------------------------------------------------------------------------------------------------------------------------------------------------------------------------------------------------------------------------------------------------------------------------------------------------------------------------------------------------------------------------------------------------------------------------------------------------------------------------------------------------------------------------------------------------------------------------------------------------------------------------------------------------------------------------------------------------------------------------------------------------------------------------------------------------------------------------------------------------------------------------------------------------------------------------------------------------------------------------------------------------------------------------------------------------------------------------------------------------------------------------------------------------------------------------------------------------------------------------------------------------------------------------------------------------------------------------------------------------------------------------------------------------------------------------------------------------------------------------------------------------------------------------------------------------------------------------------------------------------------------------------------------------------------------------------------------------------------------------------------------------------------------------------------------------------------------------------------------------------------------------------------------------------------------------------------------------------------------------------------------------------------------------------------------------------------------------------------------------------------------------------------------------------------------------------------------------------------------------------------------------------------------------------------------------------------------------------------------------------------------------------------------------------------------------------------------------------------------------------------------------------------------------------------------------------------------------------------------------------------------------------------------------------------------------------------------------------------------------------------------------------------------------------------------------------------------------------------------------------------------------------------------------------------------------------------------------------------------------------------------------------------------------------------------------------------------------------------------------------------------------------------------------------------------------------------------------------------------------------------------------------------------------------------------------------------------------------------------------------------------------------------------------------------------------------------------------------------------------------------------------------------------------------------------------------------------------------------------------------------------------------------------------------------------------------------------------------------------------------------------------------------------------------------------------------------------------------------------------------------------------------------------------------------------------------------------------------------------------------------------------------------------------------------------------------------------------------------------------------------------------------------------------------------------------------------------------------------------------------------------------------------------------------------------------------------------------------------------------------------------------------------------------------------------------------------------------------------------------------------------------------------------------------------------------------------------------------------------------------------------------------------------------------------------------------------------------------------------------------------------------------------------------------------------------------------------------------------------------------------------------------------------------------------------------------------------------------------------------------------------------------------------------------------------------------------------------------------------------------------------------------------------------------------------------------------------------------------------------------------------------------------------------------------------------------------------------------------------------------------------------------------------------------------------------------------------------------------------------------------------------------------------------------------------------------------------------------------------------------------------------------------------------------------------------------------------------------------------------|
| <b>Hip Fracture</b>                                         | 82000 82001 82002 82003 82009 82010 82011 82012 82013 82019 82020 82021 82022 82030 82031 82032 8208 8209 82100 82101 82110 82111                                                                                                                                                                                                                                                                                                                                                                                                                                                                                                                                                                                                                                                                                                                                                                                                                                                                                                                                                                                                                                                                                                                                                                                                                                                                                                                                                                                                                                                                                                                                                                                                                                                                                                                                                                                                                                                                                                                                                                                                                                                                                                                                                                                                                                                                                                                                                                                                                                                                                                                                                                                                                                                                                                                                                                                                                                                                                                                                                                                                                                                                                                                                                                                                                                                                                                                                                                                                                                                                                                                                                                                                                                                                                                                                                                                                                                                                                                                                                                                                                                                                                                                                                                                                                                                                                                                                                                                                                                                                                                                                                                                                                                                                                                                                                                                                                                                                                                                                                                                                                                                                                                                                                                                                                                                                                                                                                                                                                                                                                                                                                                                                                                                                                                                                                                                                                                                                                                                                                                                                                                                                                                                                                                                                                                                                                                                                                                                                                                                                                                                                                                                                                                                                                                                                                                                                                                                                                                                                                                                                                                                                                                                                                                                                                                                                                                                                                                                                                                                                                                                                                                                                                                                                                                                                                                                                                                                                                                                                                                                                                                                                                                                                                                                                                                                                                                                                                                                                                                                                                                                                                                                                                                                                                                                                                                                                                                                                                                                                                                                                                                                                                                     |
| <b>Distal Radius/Wrist Fragility Fracture</b>               | 81340 81341 81342 81343 81344 81345 81346 81347 81350 81351 81352 81353 81354 81400 81410                                                                                                                                                                                                                                                                                                                                                                                                                                                                                                                                                                                                                                                                                                                                                                                                                                                                                                                                                                                                                                                                                                                                                                                                                                                                                                                                                                                                                                                                                                                                                                                                                                                                                                                                                                                                                                                                                                                                                                                                                                                                                                                                                                                                                                                                                                                                                                                                                                                                                                                                                                                                                                                                                                                                                                                                                                                                                                                                                                                                                                                                                                                                                                                                                                                                                                                                                                                                                                                                                                                                                                                                                                                                                                                                                                                                                                                                                                                                                                                                                                                                                                                                                                                                                                                                                                                                                                                                                                                                                                                                                                                                                                                                                                                                                                                                                                                                                                                                                                                                                                                                                                                                                                                                                                                                                                                                                                                                                                                                                                                                                                                                                                                                                                                                                                                                                                                                                                                                                                                                                                                                                                                                                                                                                                                                                                                                                                                                                                                                                                                                                                                                                                                                                                                                                                                                                                                                                                                                                                                                                                                                                                                                                                                                                                                                                                                                                                                                                                                                                                                                                                                                                                                                                                                                                                                                                                                                                                                                                                                                                                                                                                                                                                                                                                                                                                                                                                                                                                                                                                                                                                                                                                                                                                                                                                                                                                                                                                                                                                                                                                                                                                                                             |
| <b>Humerus Fragility Fracture</b>                           | 81200 81201 81202 81203 81209 81210 81211 81212 81213 81219                                                                                                                                                                                                                                                                                                                                                                                                                                                                                                                                                                                                                                                                                                                                                                                                                                                                                                                                                                                                                                                                                                                                                                                                                                                                                                                                                                                                                                                                                                                                                                                                                                                                                                                                                                                                                                                                                                                                                                                                                                                                                                                                                                                                                                                                                                                                                                                                                                                                                                                                                                                                                                                                                                                                                                                                                                                                                                                                                                                                                                                                                                                                                                                                                                                                                                                                                                                                                                                                                                                                                                                                                                                                                                                                                                                                                                                                                                                                                                                                                                                                                                                                                                                                                                                                                                                                                                                                                                                                                                                                                                                                                                                                                                                                                                                                                                                                                                                                                                                                                                                                                                                                                                                                                                                                                                                                                                                                                                                                                                                                                                                                                                                                                                                                                                                                                                                                                                                                                                                                                                                                                                                                                                                                                                                                                                                                                                                                                                                                                                                                                                                                                                                                                                                                                                                                                                                                                                                                                                                                                                                                                                                                                                                                                                                                                                                                                                                                                                                                                                                                                                                                                                                                                                                                                                                                                                                                                                                                                                                                                                                                                                                                                                                                                                                                                                                                                                                                                                                                                                                                                                                                                                                                                                                                                                                                                                                                                                                                                                                                                                                                                                                                                                           |
| <b>Vertebral Fragility Fracture</b>                         | 805.0x 805.2x 805.4x 805.6x 805.8x                                                                                                                                                                                                                                                                                                                                                                                                                                                                                                                                                                                                                                                                                                                                                                                                                                                                                                                                                                                                                                                                                                                                                                                                                                                                                                                                                                                                                                                                                                                                                                                                                                                                                                                                                                                                                                                                                                                                                                                                                                                                                                                                                                                                                                                                                                                                                                                                                                                                                                                                                                                                                                                                                                                                                                                                                                                                                                                                                                                                                                                                                                                                                                                                                                                                                                                                                                                                                                                                                                                                                                                                                                                                                                                                                                                                                                                                                                                                                                                                                                                                                                                                                                                                                                                                                                                                                                                                                                                                                                                                                                                                                                                                                                                                                                                                                                                                                                                                                                                                                                                                                                                                                                                                                                                                                                                                                                                                                                                                                                                                                                                                                                                                                                                                                                                                                                                                                                                                                                                                                                                                                                                                                                                                                                                                                                                                                                                                                                                                                                                                                                                                                                                                                                                                                                                                                                                                                                                                                                                                                                                                                                                                                                                                                                                                                                                                                                                                                                                                                                                                                                                                                                                                                                                                                                                                                                                                                                                                                                                                                                                                                                                                                                                                                                                                                                                                                                                                                                                                                                                                                                                                                                                                                                                                                                                                                                                                                                                                                                                                                                                                                                                                                                                                    |
| <b>Pathologic Fracture</b>                                  | 73310 73311 73312 73313 73314 73315 73316 73319                                                                                                                                                                                                                                                                                                                                                                                                                                                                                                                                                                                                                                                                                                                                                                                                                                                                                                                                                                                                                                                                                                                                                                                                                                                                                                                                                                                                                                                                                                                                                                                                                                                                                                                                                                                                                                                                                                                                                                                                                                                                                                                                                                                                                                                                                                                                                                                                                                                                                                                                                                                                                                                                                                                                                                                                                                                                                                                                                                                                                                                                                                                                                                                                                                                                                                                                                                                                                                                                                                                                                                                                                                                                                                                                                                                                                                                                                                                                                                                                                                                                                                                                                                                                                                                                                                                                                                                                                                                                                                                                                                                                                                                                                                                                                                                                                                                                                                                                                                                                                                                                                                                                                                                                                                                                                                                                                                                                                                                                                                                                                                                                                                                                                                                                                                                                                                                                                                                                                                                                                                                                                                                                                                                                                                                                                                                                                                                                                                                                                                                                                                                                                                                                                                                                                                                                                                                                                                                                                                                                                                                                                                                                                                                                                                                                                                                                                                                                                                                                                                                                                                                                                                                                                                                                                                                                                                                                                                                                                                                                                                                                                                                                                                                                                                                                                                                                                                                                                                                                                                                                                                                                                                                                                                                                                                                                                                                                                                                                                                                                                                                                                                                                                                                       |
| <b>Chronic Kidney Disease Stages 4/5 or Dialysis Status</b> | 5854 5855 5856 5880 40301 40311 40391 40402 40403 40412 40413 40492 40493 99656 99668 99673 V4511 V4512 V560 V561 V562 V5631 V5632 V568 5854 5855 5856 5880 40301 40311 40391 40402 40403 40412 40413 40492 40493 99656 99668 99673 V4511 V4512 V560 V561 V562 V5631 V5632 V568                                                                                                                                                                                                                                                                                                                                                                                                                                                                                                                                                                                                                                                                                                                                                                                                                                                                                                                                                                                                                                                                                                                                                                                                                                                                                                                                                                                                                                                                                                                                                                                                                                                                                                                                                                                                                                                                                                                                                                                                                                                                                                                                                                                                                                                                                                                                                                                                                                                                                                                                                                                                                                                                                                                                                                                                                                                                                                                                                                                                                                                                                                                                                                                                                                                                                                                                                                                                                                                                                                                                                                                                                                                                                                                                                                                                                                                                                                                                                                                                                                                                                                                                                                                                                                                                                                                                                                                                                                                                                                                                                                                                                                                                                                                                                                                                                                                                                                                                                                                                                                                                                                                                                                                                                                                                                                                                                                                                                                                                                                                                                                                                                                                                                                                                                                                                                                                                                                                                                                                                                                                                                                                                                                                                                                                                                                                                                                                                                                                                                                                                                                                                                                                                                                                                                                                                                                                                                                                                                                                                                                                                                                                                                                                                                                                                                                                                                                                                                                                                                                                                                                                                                                                                                                                                                                                                                                                                                                                                                                                                                                                                                                                                                                                                                                                                                                                                                                                                                                                                                                                                                                                                                                                                                                                                                                                                                                                                                                                                                       |
| <b>Cancer (except non-melanoma of skin)</b>                 | 1400-1729 1740-20935 20970-20979 2350-2399 V1000-V1091 1960-1192                                                                                                                                                                                                                                                                                                                                                                                                                                                                                                                                                                                                                                                                                                                                                                                                                                                                                                                                                                                                                                                                                                                                                                                                                                                                                                                                                                                                                                                                                                                                                                                                                                                                                                                                                                                                                                                                                                                                                                                                                                                                                                                                                                                                                                                                                                                                                                                                                                                                                                                                                                                                                                                                                                                                                                                                                                                                                                                                                                                                                                                                                                                                                                                                                                                                                                                                                                                                                                                                                                                                                                                                                                                                                                                                                                                                                                                                                                                                                                                                                                                                                                                                                                                                                                                                                                                                                                                                                                                                                                                                                                                                                                                                                                                                                                                                                                                                                                                                                                                                                                                                                                                                                                                                                                                                                                                                                                                                                                                                                                                                                                                                                                                                                                                                                                                                                                                                                                                                                                                                                                                                                                                                                                                                                                                                                                                                                                                                                                                                                                                                                                                                                                                                                                                                                                                                                                                                                                                                                                                                                                                                                                                                                                                                                                                                                                                                                                                                                                                                                                                                                                                                                                                                                                                                                                                                                                                                                                                                                                                                                                                                                                                                                                                                                                                                                                                                                                                                                                                                                                                                                                                                                                                                                                                                                                                                                                                                                                                                                                                                                                                                                                                                                                      |
| <b>Tobacco /Chronic Obstructive Pulmonary Disease</b>       | 415.0 416.8 416.9 491.0 492.0 494.0 496.0 305.1 V15.82 989.84                                                                                                                                                                                                                                                                                                                                                                                                                                                                                                                                                                                                                                                                                                                                                                                                                                                                                                                                                                                                                                                                                                                                                                                                                                                                                                                                                                                                                                                                                                                                                                                                                                                                                                                                                                                                                                                                                                                                                                                                                                                                                                                                                                                                                                                                                                                                                                                                                                                                                                                                                                                                                                                                                                                                                                                                                                                                                                                                                                                                                                                                                                                                                                                                                                                                                                                                                                                                                                                                                                                                                                                                                                                                                                                                                                                                                                                                                                                                                                                                                                                                                                                                                                                                                                                                                                                                                                                                                                                                                                                                                                                                                                                                                                                                                                                                                                                                                                                                                                                                                                                                                                                                                                                                                                                                                                                                                                                                                                                                                                                                                                                                                                                                                                                                                                                                                                                                                                                                                                                                                                                                                                                                                                                                                                                                                                                                                                                                                                                                                                                                                                                                                                                                                                                                                                                                                                                                                                                                                                                                                                                                                                                                                                                                                                                                                                                                                                                                                                                                                                                                                                                                                                                                                                                                                                                                                                                                                                                                                                                                                                                                                                                                                                                                                                                                                                                                                                                                                                                                                                                                                                                                                                                                                                                                                                                                                                                                                                                                                                                                                                                                                                                                                                         |
| <b>Depression</b>                                           | 296.2 296.21 296.22 296.3 296.23 296.25 296.26 296.30 296.31 296.32 296.33 296.35 296.36 300.4 301.0 301.11 301.12 301.13 309.1 311                                                                                                                                                                                                                                                                                                                                                                                                                                                                                                                                                                                                                                                                                                                                                                                                                                                                                                                                                                                                                                                                                                                                                                                                                                                                                                                                                                                                                                                                                                                                                                                                                                                                                                                                                                                                                                                                                                                                                                                                                                                                                                                                                                                                                                                                                                                                                                                                                                                                                                                                                                                                                                                                                                                                                                                                                                                                                                                                                                                                                                                                                                                                                                                                                                                                                                                                                                                                                                                                                                                                                                                                                                                                                                                                                                                                                                                                                                                                                                                                                                                                                                                                                                                                                                                                                                                                                                                                                                                                                                                                                                                                                                                                                                                                                                                                                                                                                                                                                                                                                                                                                                                                                                                                                                                                                                                                                                                                                                                                                                                                                                                                                                                                                                                                                                                                                                                                                                                                                                                                                                                                                                                                                                                                                                                                                                                                                                                                                                                                                                                                                                                                                                                                                                                                                                                                                                                                                                                                                                                                                                                                                                                                                                                                                                                                                                                                                                                                                                                                                                                                                                                                                                                                                                                                                                                                                                                                                                                                                                                                                                                                                                                                                                                                                                                                                                                                                                                                                                                                                                                                                                                                                                                                                                                                                                                                                                                                                                                                                                                                                                                                                                   |
| <b>Serious Mental Illness</b>                               | 295.00 295.01 295.02 295.03 295.04 295.05 295.10 295.11 295.12 295.13 295.14 295.15 295.20 295.21 295.22 295.23 295.24 295.25 295.30 295.31 295.32 295.33 295.34 295.35 295.40 295.41 295.42 295.43 295.44 295.45 295.50 295.51 295.52 295.53 295.54 295.55 295.60 295.61 295.62 295.63 295.64 295.65 295.70 295.71 295.72 295.73 295.74 295.75 295.80 295.81 295.82 295.83 295.84 295.85 295.90 295.91 295.92 295.93 295.94 295.95 296.00 296.01 296.02 296.03 296.04 296.05 296.06 296.10 296.11 296.12 296.13 296.14 296.15 296.16 296.24 296.34 296.40 296.41 296.42 296.43 296.44 296.45 296.46 296.50 296.51 296.52 296.53 296.54 296.55 296.56 296.60 296.61 296.62 296.63 296.64 296.65 296.66 296.7 296.80 296.81 296.82 296.89 296.90 296.99 297.0 297.1 297.2 297.3 297.8 297.9 2980 2981 2982 2983 2984 2988 2989                                                                                                                                                                                                                                                                                                                                                                                                                                                                                                                                                                                                                                                                                                                                                                                                                                                                                                                                                                                                                                                                                                                                                                                                                                                                                                                                                                                                                                                                                                                                                                                                                                                                                                                                                                                                                                                                                                                                                                                                                                                                                                                                                                                                                                                                                                                                                                                                                                                                                                                                                                                                                                                                                                                                                                                                                                                                                                                                                                                                                                                                                                                                                                                                                                                                                                                                                                                                                                                                                                                                                                                                                                                                                                                                                                                                                                                                                                                                                                                                                                                                                                                                                                                                                                                                                                                                                                                                                                                                                                                                                                                                                                                                                                                                                                                                                                                                                                                                                                                                                                                                                                                                                                                                                                                                                                                                                                                                                                                                                                                                                                                                                                                                                                                                                                                                                                                                                                                                                                                                                                                                                                                                                                                                                                                                                                                                                                                                                                                                                                                                                                                                                                                                                                                                                                                                                                                                                                                                                                                                                                                                                                                                                                                                                                                                                                                                                                                                                                                                                                                                                                                                                                                                                                                                                                                                                                                                                                                                                                                                                                                                                                                                                                                                                                                                                                                                                                                                         |
| <b>Alcohol Abuse</b>                                        | V113.x V791.x 291.0-291.9 303.0-303.9** Please see note below on data redaction                                                                                                                                                                                                                                                                                                                                                                                                                                                                                                                                                                                                                                                                                                                                                                                                                                                                                                                                                                                                                                                                                                                                                                                                                                                                                                                                                                                                                                                                                                                                                                                                                                                                                                                                                                                                                                                                                                                                                                                                                                                                                                                                                                                                                                                                                                                                                                                                                                                                                                                                                                                                                                                                                                                                                                                                                                                                                                                                                                                                                                                                                                                                                                                                                                                                                                                                                                                                                                                                                                                                                                                                                                                                                                                                                                                                                                                                                                                                                                                                                                                                                                                                                                                                                                                                                                                                                                                                                                                                                                                                                                                                                                                                                                                                                                                                                                                                                                                                                                                                                                                                                                                                                                                                                                                                                                                                                                                                                                                                                                                                                                                                                                                                                                                                                                                                                                                                                                                                                                                                                                                                                                                                                                                                                                                                                                                                                                                                                                                                                                                                                                                                                                                                                                                                                                                                                                                                                                                                                                                                                                                                                                                                                                                                                                                                                                                                                                                                                                                                                                                                                                                                                                                                                                                                                                                                                                                                                                                                                                                                                                                                                                                                                                                                                                                                                                                                                                                                                                                                                                                                                                                                                                                                                                                                                                                                                                                                                                                                                                                                                                                                                                                                                       |
| <b>Obesity Overweight</b>                                   | 27801 27803 V8535 V8536 V8537 V8538 V8539 V854 V8541 V8542 V8543 V8544 V8545 27800 V853 V8530 V8531 V8532 V8533 V8534 27802 V852 V8521 V8522 V8523 V8524 V8525                                                                                                                                                                                                                                                                                                                                                                                                                                                                                                                                                                                                                                                                                                                                                                                                                                                                                                                                                                                                                                                                                                                                                                                                                                                                                                                                                                                                                                                                                                                                                                                                                                                                                                                                                                                                                                                                                                                                                                                                                                                                                                                                                                                                                                                                                                                                                                                                                                                                                                                                                                                                                                                                                                                                                                                                                                                                                                                                                                                                                                                                                                                                                                                                                                                                                                                                                                                                                                                                                                                                                                                                                                                                                                                                                                                                                                                                                                                                                                                                                                                                                                                                                                                                                                                                                                                                                                                                                                                                                                                                                                                                                                                                                                                                                                                                                                                                                                                                                                                                                                                                                                                                                                                                                                                                                                                                                                                                                                                                                                                                                                                                                                                                                                                                                                                                                                                                                                                                                                                                                                                                                                                                                                                                                                                                                                                                                                                                                                                                                                                                                                                                                                                                                                                                                                                                                                                                                                                                                                                                                                                                                                                                                                                                                                                                                                                                                                                                                                                                                                                                                                                                                                                                                                                                                                                                                                                                                                                                                                                                                                                                                                                                                                                                                                                                                                                                                                                                                                                                                                                                                                                                                                                                                                                                                                                                                                                                                                                                                                                                                                                                        |
| <b>Osteoporosis/osteopenia</b>                              | 73300-73309                                                                                                                                                                                                                                                                                                                                                                                                                                                                                                                                                                                                                                                                                                                                                                                                                                                                                                                                                                                                                                                                                                                                                                                                                                                                                                                                                                                                                                                                                                                                                                                                                                                                                                                                                                                                                                                                                                                                                                                                                                                                                                                                                                                                                                                                                                                                                                                                                                                                                                                                                                                                                                                                                                                                                                                                                                                                                                                                                                                                                                                                                                                                                                                                                                                                                                                                                                                                                                                                                                                                                                                                                                                                                                                                                                                                                                                                                                                                                                                                                                                                                                                                                                                                                                                                                                                                                                                                                                                                                                                                                                                                                                                                                                                                                                                                                                                                                                                                                                                                                                                                                                                                                                                                                                                                                                                                                                                                                                                                                                                                                                                                                                                                                                                                                                                                                                                                                                                                                                                                                                                                                                                                                                                                                                                                                                                                                                                                                                                                                                                                                                                                                                                                                                                                                                                                                                                                                                                                                                                                                                                                                                                                                                                                                                                                                                                                                                                                                                                                                                                                                                                                                                                                                                                                                                                                                                                                                                                                                                                                                                                                                                                                                                                                                                                                                                                                                                                                                                                                                                                                                                                                                                                                                                                                                                                                                                                                                                                                                                                                                                                                                                                                                                                                                           |
| <b>Dementia</b>                                             | 046 046.11 046.19 046.2 046.3 046.71 046.72 046.79 046.8 046.9 290 290.1 290.11 290.12 290.13 290.2 290.21 290.3 290.4 290.41 290.42 290.43 290.8 290.9 294 294.1 294.11 294.2 294.21 294.8 294.9 330 330.1 330.2 330.3 330.8 330.9 331 331.7 331.11 331.19 331.2 331.6 331.81 331.82 331.89 331.9                                                                                                                                                                                                                                                                                                                                                                                                                                                                                                                                                                                                                                                                                                                                                                                                                                                                                                                                                                                                                                                                                                                                                                                                                                                                                                                                                                                                                                                                                                                                                                                                                                                                                                                                                                                                                                                                                                                                                                                                                                                                                                                                                                                                                                                                                                                                                                                                                                                                                                                                                                                                                                                                                                                                                                                                                                                                                                                                                                                                                                                                                                                                                                                                                                                                                                                                                                                                                                                                                                                                                                                                                                                                                                                                                                                                                                                                                                                                                                                                                                                                                                                                                                                                                                                                                                                                                                                                                                                                                                                                                                                                                                                                                                                                                                                                                                                                                                                                                                                                                                                                                                                                                                                                                                                                                                                                                                                                                                                                                                                                                                                                                                                                                                                                                                                                                                                                                                                                                                                                                                                                                                                                                                                                                                                                                                                                                                                                                                                                                                                                                                                                                                                                                                                                                                                                                                                                                                                                                                                                                                                                                                                                                                                                                                                                                                                                                                                                                                                                                                                                                                                                                                                                                                                                                                                                                                                                                                                                                                                                                                                                                                                                                                                                                                                                                                                                                                                                                                                                                                                                                                                                                                                                                                                                                                                                                                                                                                                                    |
| <b>Diabetes</b>                                             | '24900','24901','24910','24911','24920','24921','24930','24931','24940','24941','24950','24951','24960','24961','24970','24971','24980','24981','24990','24991','25000','25001','25002','25003','25010','25011','25012','25013','25020','25021','25022','25023','25030','25031','25032','25033','25040','25041','25042','25043','25050','25051','25052','25053','25060','25061','25062','25063','25070','25071','25072','25073','25080','25081','25082','25083','25090','25091','25092','25093','36201','36203','36204','36205','36206','36207','36641','V5867'                                                                                                                                                                                                                                                                                                                                                                                                                                                                                                                                                                                                                                                                                                                                                                                                                                                                                                                                                                                                                                                                                                                                                                                                                                                                                                                                                                                                                                                                                                                                                                                                                                                                                                                                                                                                                                                                                                                                                                                                                                                                                                                                                                                                                                                                                                                                                                                                                                                                                                                                                                                                                                                                                                                                                                                                                                                                                                                                                                                                                                                                                                                                                                                                                                                                                                                                                                                                                                                                                                                                                                                                                                                                                                                                                                                                                                                                                                                                                                                                                                                                                                                                                                                                                                                                                                                                                                                                                                                                                                                                                                                                                                                                                                                                                                                                                                                                                                                                                                                                                                                                                                                                                                                                                                                                                                                                                                                                                                                                                                                                                                                                                                                                                                                                                                                                                                                                                                                                                                                                                                                                                                                                                                                                                                                                                                                                                                                                                                                                                                                                                                                                                                                                                                                                                                                                                                                                                                                                                                                                                                                                                                                                                                                                                                                                                                                                                                                                                                                                                                                                                                                                                                                                                                                                                                                                                                                                                                                                                                                                                                                                                                                                                                                                                                                                                                                                                                                                                                                                                                                                                                                                                                                                       |
| <b>Liver Disease</b>                                        | '5550','5551','5552','5559','5560','5561','5562','5563','5564','5565','5566','5568','5569'                                                                                                                                                                                                                                                                                                                                                                                                                                                                                                                                                                                                                                                                                                                                                                                                                                                                                                                                                                                                                                                                                                                                                                                                                                                                                                                                                                                                                                                                                                                                                                                                                                                                                                                                                                                                                                                                                                                                                                                                                                                                                                                                                                                                                                                                                                                                                                                                                                                                                                                                                                                                                                                                                                                                                                                                                                                                                                                                                                                                                                                                                                                                                                                                                                                                                                                                                                                                                                                                                                                                                                                                                                                                                                                                                                                                                                                                                                                                                                                                                                                                                                                                                                                                                                                                                                                                                                                                                                                                                                                                                                                                                                                                                                                                                                                                                                                                                                                                                                                                                                                                                                                                                                                                                                                                                                                                                                                                                                                                                                                                                                                                                                                                                                                                                                                                                                                                                                                                                                                                                                                                                                                                                                                                                                                                                                                                                                                                                                                                                                                                                                                                                                                                                                                                                                                                                                                                                                                                                                                                                                                                                                                                                                                                                                                                                                                                                                                                                                                                                                                                                                                                                                                                                                                                                                                                                                                                                                                                                                                                                                                                                                                                                                                                                                                                                                                                                                                                                                                                                                                                                                                                                                                                                                                                                                                                                                                                                                                                                                                                                                                                                                                                            |
| <b>Pancreatic Disease</b>                                   | '0402','0723','2514','2515','2518','2519','5770','5771','5772','5778','5779','5790','5791','5792','5793','5794','5798','5799'                                                                                                                                                                                                                                                                                                                                                                                                                                                                                                                                                                                                                                                                                                                                                                                                                                                                                                                                                                                                                                                                                                                                                                                                                                                                                                                                                                                                                                                                                                                                                                                                                                                                                                                                                                                                                                                                                                                                                                                                                                                                                                                                                                                                                                                                                                                                                                                                                                                                                                                                                                                                                                                                                                                                                                                                                                                                                                                                                                                                                                                                                                                                                                                                                                                                                                                                                                                                                                                                                                                                                                                                                                                                                                                                                                                                                                                                                                                                                                                                                                                                                                                                                                                                                                                                                                                                                                                                                                                                                                                                                                                                                                                                                                                                                                                                                                                                                                                                                                                                                                                                                                                                                                                                                                                                                                                                                                                                                                                                                                                                                                                                                                                                                                                                                                                                                                                                                                                                                                                                                                                                                                                                                                                                                                                                                                                                                                                                                                                                                                                                                                                                                                                                                                                                                                                                                                                                                                                                                                                                                                                                                                                                                                                                                                                                                                                                                                                                                                                                                                                                                                                                                                                                                                                                                                                                                                                                                                                                                                                                                                                                                                                                                                                                                                                                                                                                                                                                                                                                                                                                                                                                                                                                                                                                                                                                                                                                                                                                                                                                                                                                                                         |
| <b>Inflammatory Bowel Disease</b>                           | '5550','5551','5552','5559','5560','5561','5562','5563','5564','5565','5566','5568','5569'                                                                                                                                                                                                                                                                                                                                                                                                                                                                                                                                                                                                                                                                                                                                                                                                                                                                                                                                                                                                                                                                                                                                                                                                                                                                                                                                                                                                                                                                                                                                                                                                                                                                                                                                                                                                                                                                                                                                                                                                                                                                                                                                                                                                                                                                                                                                                                                                                                                                                                                                                                                                                                                                                                                                                                                                                                                                                                                                                                                                                                                                                                                                                                                                                                                                                                                                                                                                                                                                                                                                                                                                                                                                                                                                                                                                                                                                                                                                                                                                                                                                                                                                                                                                                                                                                                                                                                                                                                                                                                                                                                                                                                                                                                                                                                                                                                                                                                                                                                                                                                                                                                                                                                                                                                                                                                                                                                                                                                                                                                                                                                                                                                                                                                                                                                                                                                                                                                                                                                                                                                                                                                                                                                                                                                                                                                                                                                                                                                                                                                                                                                                                                                                                                                                                                                                                                                                                                                                                                                                                                                                                                                                                                                                                                                                                                                                                                                                                                                                                                                                                                                                                                                                                                                                                                                                                                                                                                                                                                                                                                                                                                                                                                                                                                                                                                                                                                                                                                                                                                                                                                                                                                                                                                                                                                                                                                                                                                                                                                                                                                                                                                                                                            |
| <b>Rheumatologic Disease</b>                                | '0993','1361','4460','4461','44620','44621','44629','4463','4464','4465','4466','4467','6960','7100','7101','7102','7103','7104','7105','7108','7109','71110','71111','71112','71113','71114','71115','71116','71117','71118','71119','71120','71121','71122','71123','71124','71125','71126','71127','71128','71129','71130','71131','71132','71133','71134','71135','71136','71137','71138','71139','71140','71141','71142','71143','71144','71145','71146','71147','71148','71149','71150','71151','71152','71153','71154','71155','71156','71157','71158','71159','71160','71161','71162','71163','71164','71165','71166','71167','71168','71169','71170','71171','71172','71173','71174','71175','71176','71177','71178','71179','71180','71181','71182','71183','71184','71185','71186','71187','71188','71189','71190','71191','71192','71193','71194','71195','71196','71197','71198','71199','72000','72001','72002','72003','72004','72005','72006','72007','72008','72009','72010','72011','72012','72013','72014','72015','72016','72017','72018','72019','72020','72021','72022','72023','72024','72025','72026','72027','72028','72029','72030','72031','72032','72033','72034','72035','72036','72037','72038','72039','72040','72041','72042','72043','72044','72045','72046','72047','72048','72049','72050','72051','72052','72053','72054','72055','72056','72057','72058','72059','72060','72061','72062','72063','72064','72065','72066','72067','72068','72069','72070','72071','72072','72073','72074','72075','72076','72077','72078','72079','72080','72081','72082','72083','72084','72085','72086','72087','72088','72089','72090','72091','72092','72093','72094','72095','72096','72097','72098','72099','72100','72101','72102','72103','72104','72105','72106','72107','72108','72109','72110','72111','72112','72113','72114','72115','72116','72117','72118','72119','72120','72121','72122','72123','72124','72125','72126','72127','72128','72129','72130','72131','72132','72133','72134','72135','72136','72137','72138','72139','72140','72141','72142','72143','72144','72145','72146','72147','72148','72149','72150','72151','72152','72153','72154','72155','72156','72157','72158','72159','72160','72161','72162','72163','72164','72165','72166','72167','72168','72169','72170','72171','72172','72173','72174','72175','72176','72177','72178','72179','72180','72181','72182','72183','72184','72185','72186','72187','72188','72189','72190','72191','72192','72193','72194','72195','72196','72197','72198','72199','72200','72201','72202','72203','72204','72205','72206','72207','72208','72209','72210','72211','72212','72213','72214','72215','72216','72217','72218','72219','72220','72221','72222','72223','72224','72225','72226','72227','72228','72229','72230','72231','72232','72233','72234','72235','72236','72237','72238','72239','72240','72241','72242','72243','72244','72245','72246','72247','72248','72249','72250','72251','72252','72253','72254','72255','72256','72257','72258','72259','72260','72261','72262','72263','72264','72265','72266','72267','72268','72269','72270','72271','72272','72273','72274','72275','72276','72277','72278','72279','72280','72281','72282','72283','72284','72285','72286','72287','72288','72289','72290','72291','72292','72293','72294','72295','72296','72297','72298','72299','72300','72301','72302','72303','72304','72305','72306','72307','72308','72309','72310','72311','72312','72313','72314','72315','72316','72317','72318','72319','72320','72321','72322','72323','72324','72325','72326','72327','72328','72329','72330','72331','72332','72333','72334','72335','72336','72337','72338','72339','72340','72341','72342','72343','72344','72345','72346','72347','72348','72349','72350','72351','72352','72353','72354','72355','72356','72357','72358','72359','72360','72361','72362','72363','72364','72365','72366','72367','72368','72369','72370','72371','72372','72373','72374','72375','72376','72377','72378','72379','72380','72381','72382','72383','72384','72385','72386','72387','72388','72389','72390','72391','72392','72393','72394','72395','72396','72397','72398','72399','72400','72401','72402','72403','72404','72405','72406','72407','72408','72409','72410','72411','72412','72413','72414','72415','72416','72417','72418','72419','72420','72421','72422','72423','72424','72425','72426','72427','72428','72429','72430','72431','72432','72433','72434','72435','72436','72437','72438','72439','72440','72441','72442','72443','72444','72445','72446','72447','72448','72449','72450','72451','72452','72453','72454','72455','72456','72457','72458','72459','72460','72461','72462','72463','72464','72465','72466','72467','72468','72469','72470','72471','72472','72473','72474','72475','72476','72477','72478','72479','72480','72481','72482','72483','72484','72485','72486','72487','72488','72489','72490','72491','72492','72493','72494','72495','72496','72497','72498','72499','72500','72501','72502','72503','72504','72505','72506','72507','72508','72509','72510','72511','72512','72513','72514','72515','72516','72517','72518','72519','72520','72521','72522','72523','72524','72525','72526','72527','72528','72529','72530','72531','72532','72533','72534','72535','72536','72537','72538','72539','72540','72541','72542','72543','72544','72545','72546','72547','72548','72549','72550','72551','72552','72553','72554','72555','72556','72557','72558','72559','72560','72561','72562','72563','72564','72565','72566','72567','72568','72569','72570','72571','72572','72573','72574','72575','72576','72577','72578','72579','72580','72581','72582','72583','72584','72585','72586','72587','72588','72589','72590','72591','72592','72593','72594','72595','72596','72597','72598','72599','72600','72601','72602','72603','72604','72605','72606','72607','72608','72609','72610','72611','72612','72613','72614','72615','72616','72617','72618','72619','72620','72621','72622','72623','72624','72625','72626','72627','72628','72629','72630','72631','72632','72633','72634','72635','72636','72637','72638','72639','72640','72641','72642','72643','72644','72645','72646','72647','72648','72649','72650','72651','72652','72653','72654','72655','72656','72657','72658','72659','72660','72661','72662','72663','72664','72665','72666','72667','72668','72669','72670','72671','72672','72673','72674','72675','72676','72677','72678','72679','72680','72681','72682','72683','72684','72685','72686','72687','72688','72689','72690','72691','72692','72693','72694','72695','72696','72697','72698','72699','72700','72701','72702','72703','72704','72705','72706','72707','72708','72709','72710','72711','72712','72713','72714','72715','72716','72717','72718','72719','72720','72721','72722','72723','72724','72725','72726','72727','72728','72729','72730','72731','72732','72733','72734','72735','72736','72737','72738','72739','72740','72741','72742','72743','72744','72745','72746','72747','72748','72749','72750','72751','72752','72753','72754','72755','72756','72757','72758','72759','72760','72761','72762','72763','72764','72765','72766','72767','72768','72769','72770','72771','72772','72773','72774','72775','72776','72777','72778','72779','72780','72781','72782','72783','72784','72785','72786','72787','72788','72789','72790','72791','72792','72793','72794','72795','72796','72797','72798','72799','72800','72801','72802','72803','72804','72805','72806','72807','72808','72809','72810','72811','72812','72813','72814','72815','72816','72817','72818','72819','72820','72821','72822','72823','72824','72825','72826','72827','72828','72829','72830','72831','72832','72833','72834','72835','72836','72837','72838','72839','72840','72841','72842','72843','72844','72845','72846','72847','72848','72849','72850','72851','72852','72853','72854','72855','72856','72857','72858','72859','72860','72861','72862','72863','72864','72865','72866','72867','72868','72869','72870','72871','72872','72873','72874','72875','72876','72877','72878','72879','72880','72881','72882','72883','72884','72885','72886','72887','72888','72889','72890','72891','72892','72893','72894','72895','72896','72897','72898','72899','72900','72901','72902','72903','72904','72905','72906','72907','72908','72909','72910','72911','72912','72913','72914','72915','72916','72917','72918','72919','72920','72921','72922','72923','72924','72925','72926','72927','72928','72929','72930','72931','72932','72933','72934','72935','72936','72937','72938','72939','72940','72941','72942','72943','72944','72945','72946','72947','72948','72949','72950','72951','72952','72953','72954','72955','72956','72957','72958','72959','72960','72961','72962','72963','72964','72965','72966','72967','72968','72969','72970','72971','72972','72973','72974','72975','72976','72977','72978','72979','72980','72981','72982','72983','72984','72985','72986','72987','72988','72989','72990','72991','72992','72993','72994','72995','72996','72997','72998','72999' |
| <b>Spinal Cord disease or injury</b>                        | '0522','05314','05474','32302','32342','32352','32363','32372','32382','3340','3341','3342','3343','3344','3348','3349','3350','33510','33511','33519','33520','33521','33522','33523','33524','33529','3358','3359','3360','3361','3362','3363','3368','3369','34120','34121','34122','3430','3432','34400','34401','34402','34403','34404','34409','3441','34460','34461','34481','7400','7401','7402','74100','74101','74102','74103','74109','74110','74119','74129','74139','74190','74191','74192','74193','7420','7421','7422','7423','7424','74251','74253','74259','7428','7429','78072','80600','80601','80602','80603','80604','80605','80606','80607','80608','80609','80610','80611','80612','80613','80614','80615','80616','80617','80618','80619','80620','80621','80622','80623','80624','80625','80626','80627','80628','80629','80630','80631','80632','80633','80634','80635','80636','80637','80638','80639','8064','8065','80660','80661','80662','80669','80670','80671','80672','80679','8068','8069','9072','95200','95201','95202','95203','95204','95205','95206','95207','95208','95209','95210','95211','95212','95213','95214','95215','95216','95217','95218','95219','9522','9523','9524','9528','9529'                                                                                                                                                                                                                                                                                                                                                                                                                                                                                                                                                                                                                                                                                                                                                                                                                                                                                                                                                                                                                                                                                                                                                                                                                                                                                                                                                                                                                                                                                                                                                                                                                                                                                                                                                                                                                                                                                                                                                                                                                                                                                                                                                                                                                                                                                                                                                                                                                                                                                                                                                                                                                                                                                                                                                                                                                                                                                                                                                                                                                                                                                                                                                                                                                                                                                                                                                                                                                                                                                                                                                                                                                                                                                                                                                                                                                                                                                                                                                                                                                                                                                                                                                                                                                                                                                                                                                                                                                                                                                                                                                                                                                                                                                                                                                                                                                                                                                                                                                                                                                                                                                                                                                                                                                                                                                                                                                                                                                                                                                                                                                                                                                                                                                                                                                                                                                                                                                                                                                                                                                                                                                                                                                                                                                                                                                                                                                                                                                                                                                                                                                                                                                                                                                                                                                                                                                                                                                                                                                                                                                                                                                                                                                                                                                                                                                                                                                                                                                                                                                                                                                                                                                                                                                                                                                                                                                                                                                                                                                                                               |
| <b>Serious Neurologic Disease</b>                           | '33700','33701','33709','3371','33720','33721','33722','33729','3373','3379','340','3410','3411','3418','3419','3560','3561','3562','3563','3564','3568','3569','3570','3571','3572','3573','3574','3575','3576','3577','35781','35782','35789','3579','35800','35801','3581','3582','35830','35831','35839','3588','3589','3590','3591','35921','35922','35923','35924','35929','3593','3594','3595','3596','35971','35979','35981','35989','3599'                                                                                                                                                                                                                                                                                                                                                                                                                                                                                                                                                                                                                                                                                                                                                                                                                                                                                                                                                                                                                                                                                                                                                                                                                                                                                                                                                                                                                                                                                                                                                                                                                                                                                                                                                                                                                                                                                                                                                                                                                                                                                                                                                                                                                                                                                                                                                                                                                                                                                                                                                                                                                                                                                                                                                                                                                                                                                                                                                                                                                                                                                                                                                                                                                                                                                                                                                                                                                                                                                                                                                                                                                                                                                                                                                                                                                                                                                                                                                                                                                                                                                                                                                                                                                                                                                                                                                                                                                                                                                                                                                                                                                                                                                                                                                                                                                                                                                                                                                                                                                                                                                                                                                                                                                                                                                                                                                                                                                                                                                                                                                                                                                                                                                                                                                                                                                                                                                                                                                                                                                                                                                                                                                                                                                                                                                                                                                                                                                                                                                                                                                                                                                                                                                                                                                                                                                                                                                                                                                                                                                                                                                                                                                                                                                                                                                                                                                                                                                                                                                                                                                                                                                                                                                                                                                                                                                                                                                                                                                                                                                                                                                                                                                                                                                                                                                                                                                                                                                                                                                                                                                                                                                                                                                                                                                                                   |
| <b>Parkinson's and Huntington's Diseases</b>                | 3320','3321','3330','3334','3330','3321','3330','3334'                                                                                                                                                                                                                                                                                                                                                                                                                                                                                                                                                                                                                                                                                                                                                                                                                                                                                                                                                                                                                                                                                                                                                                                                                                                                                                                                                                                                                                                                                                                                                                                                                                                                                                                                                                                                                                                                                                                                                                                                                                                                                                                                                                                                                                                                                                                                                                                                                                                                                                                                                                                                                                                                                                                                                                                                                                                                                                                                                                                                                                                                                                                                                                                                                                                                                                                                                                                                                                                                                                                                                                                                                                                                                                                                                                                                                                                                                                                                                                                                                                                                                                                                                                                                                                                                                                                                                                                                                                                                                                                                                                                                                                                                                                                                                                                                                                                                                                                                                                                                                                                                                                                                                                                                                                                                                                                                                                                                                                                                                                                                                                                                                                                                                                                                                                                                                                                                                                                                                                                                                                                                                                                                                                                                                                                                                                                                                                                                                                                                                                                                                                                                                                                                                                                                                                                                                                                                                                                                                                                                                                                                                                                                                                                                                                                                                                                                                                                                                                                                                                                                                                                                                                                                                                                                                                                                                                                                                                                                                                                                                                                                                                                                                                                                                                                                                                                                                                                                                                                                                                                                                                                                                                                                                                                                                                                                                                                                                                                                                                                                                                                                                                                                                                                |
| <b>Seizure Disorders and Convulsions</b>                    | '34500','34501','34510','34511','3452','3453','34540','34541','34550','34551','34560','34561','34570','34571','34580','34581','34590','34591','78031','78032','78033','78039'                                                                                                                                                                                                                                                                                                                                                                                                                                                                                                                                                                                                                                                                                                                                                                                                                                                                                                                                                                                                                                                                                                                                                                                                                                                                                                                                                                                                                                                                                                                                                                                                                                                                                                                                                                                                                                                                                                                                                                                                                                                                                                                                                                                                                                                                                                                                                                                                                                                                                                                                                                                                                                                                                                                                                                                                                                                                                                                                                                                                                                                                                                                                                                                                                                                                                                                                                                                                                                                                                                                                                                                                                                                                                                                                                                                                                                                                                                                                                                                                                                                                                                                                                                                                                                                                                                                                                                                                                                                                                                                                                                                                                                                                                                                                                                                                                                                                                                                                                                                                                                                                                                                                                                                                                                                                                                                                                                                                                                                                                                                                                                                                                                                                                                                                                                                                                                                                                                                                                                                                                                                                                                                                                                                                                                                                                                                                                                                                                                                                                                                                                                                                                                                                                                                                                                                                                                                                                                                                                                                                                                                                                                                                                                                                                                                                                                                                                                                                                                                                                                                                                                                                                                                                                                                                                                                                                                                                                                                                                                                                                                                                                                                                                                                                                                                                                                                                                                                                                                                                                                                                                                                                                                                                                                                                                                                                                                                                                                                                                                                                                                                         |
| <b>Congestive heart failure</b>                             | '39891','40201','40211','40291','40401','40411','40491','4150','4160','4161','4168','4169','4170','4171','4178','4179','4250','4251','42511','42518','4252','4253','4254','4255','4257','4258','4259','4280','4281','42820','42821','42822','42823','42830','42831','42832','42833','42840','42841','42842','42843','4289','4290','4291'                                                                                                                                                                                                                                                                                                                                                                                                                                                                                                                                                                                                                                                                                                                                                                                                                                                                                                                                                                                                                                                                                                                                                                                                                                                                                                                                                                                                                                                                                                                                                                                                                                                                                                                                                                                                                                                                                                                                                                                                                                                                                                                                                                                                                                                                                                                                                                                                                                                                                                                                                                                                                                                                                                                                                                                                                                                                                                                                                                                                                                                                                                                                                                                                                                                                                                                                                                                                                                                                                                                                                                                                                                                                                                                                                                                                                                                                                                                                                                                                                                                                                                                                                                                                                                                                                                                                                                                                                                                                                                                                                                                                                                                                                                                                                                                                                                                                                                                                                                                                                                                                                                                                                                                                                                                                                                                                                                                                                                                                                                                                                                                                                                                                                                                                                                                                                                                                                                                                                                                                                                                                                                                                                                                                                                                                                                                                                                                                                                                                                                                                                                                                                                                                                                                                                                                                                                                                                                                                                                                                                                                                                                                                                                                                                                                                                                                                                                                                                                                                                                                                                                                                                                                                                                                                                                                                                                                                                                                                                                                                                                                                                                                                                                                                                                                                                                                                                                                                                                                                                                                                                                                                                                                                                                                                                                                                                                                                                              |
| <b>Coronary Artery Disease</b>                              | '41000','41001','41002','41010','41011','41012','41020','41021','41022','41030','41031','41032','41040','41041','41042','41050','41051','41052','41060','41061','41062','41070','41071','41072','41080','41081','41082','41090','41091','41092','4110','4111','41181','41189','412','4130','4131','4139','4295','4296'                                                                                                                                                                                                                                                                                                                                                                                                                                                                                                                                                                                                                                                                                                                                                                                                                                                                                                                                                                                                                                                                                                                                                                                                                                                                                                                                                                                                                                                                                                                                                                                                                                                                                                                                                                                                                                                                                                                                                                                                                                                                                                                                                                                                                                                                                                                                                                                                                                                                                                                                                                                                                                                                                                                                                                                                                                                                                                                                                                                                                                                                                                                                                                                                                                                                                                                                                                                                                                                                                                                                                                                                                                                                                                                                                                                                                                                                                                                                                                                                                                                                                                                                                                                                                                                                                                                                                                                                                                                                                                                                                                                                                                                                                                                                                                                                                                                                                                                                                                                                                                                                                                                                                                                                                                                                                                                                                                                                                                                                                                                                                                                                                                                                                                                                                                                                                                                                                                                                                                                                                                                                                                                                                                                                                                                                                                                                                                                                                                                                                                                                                                                                                                                                                                                                                                                                                                                                                                                                                                                                                                                                                                                                                                                                                                                                                                                                                                                                                                                                                                                                                                                                                                                                                                                                                                                                                                                                                                                                                                                                                                                                                                                                                                                                                                                                                                                                                                                                                                                                                                                                                                                                                                                                                                                                                                                                                                                                                                                |
| <b>Cerebrovascular Disease</b>                              | '09487','34200','34201','34202','34210','34211','34212','34280','34281','34282','34290','34291','34292','3431','3434','3442','34430','34431','34432','34440','34441','34442','3445','34481','34489','3449','430','431','4320','4321','4329','43301','43311','43321','43331','43381','43391','43401','43411','43491','436','43820','43821','43822','43830','43831','43832','43840','43841','43842','4385                                                                                                                                                                                                                                                                                                                                                                                                                                                                                                                                                                                                                                                                                                                                                                                                                                                                                                                                                                                                                                                                                                                                                                                                                                                                                                                                                                                                                                                                                                                                                                                                                                                                                                                                                                                                                                                                                                                                                                                                                                                                                                                                                                                                                                                                                                                                                                                                                                                                                                                                                                                                                                                                                                                                                                                                                                                                                                                                                                                                                                                                                                                                                                                                                                                                                                                                                                                                                                                                                                                                                                                                                                                                                                                                                                                                                                                                                                                                                                                                                                                                                                                                                                                                                                                                                                                                                                                                                                                                                                                                                                                                                                                                                                                                                                                                                                                                                                                                                                                                                                                                                                                                                                                                                                                                                                                                                                                                                                                                                                                                                                                                                                                                                                                                                                                                                                                                                                                                                                                                                                                                                                                                                                                                                                                                                                                                                                                                                                                                                                                                                                                                                                                                                                                                                                                                                                                                                                                                                                                                                                                                                                                                                                                                                                                                                                                                                                                                                                                                                                                                                                                                                                                                                                                                                                                                                                                                                                                                                                                                                                                                                                                                                                                                                                                                                                                                                                                                                                                                                                                                                                                                                                                                                                                                                                                                                               |

eTable 2 continued

|                                                                                                                                                                                                                                                              |                                                                                                                                                                                                                                                                                                                                                                                                                                                                                                                                                                                                                                                                                                                                                                                                                                                                                                                                                                                                                                                                                                                                                                                                                                                                                                                                                                                                                                                                                                                                                                                                                                                                                                                                                                                                                                                                                                                                                                                                                                                                                                                                                                                                                                                                                                                                                                                                                                                                                                                                                                                                                                                                                                                                                                                                                                                                                                                                                                                                                                                                                                                                                                                                                                                                                                                                                                                                                                                                                                                                                                                                                                                                                                                                                                                                                                                                                                                                                                                                                                                                                                                            |
|--------------------------------------------------------------------------------------------------------------------------------------------------------------------------------------------------------------------------------------------------------------|----------------------------------------------------------------------------------------------------------------------------------------------------------------------------------------------------------------------------------------------------------------------------------------------------------------------------------------------------------------------------------------------------------------------------------------------------------------------------------------------------------------------------------------------------------------------------------------------------------------------------------------------------------------------------------------------------------------------------------------------------------------------------------------------------------------------------------------------------------------------------------------------------------------------------------------------------------------------------------------------------------------------------------------------------------------------------------------------------------------------------------------------------------------------------------------------------------------------------------------------------------------------------------------------------------------------------------------------------------------------------------------------------------------------------------------------------------------------------------------------------------------------------------------------------------------------------------------------------------------------------------------------------------------------------------------------------------------------------------------------------------------------------------------------------------------------------------------------------------------------------------------------------------------------------------------------------------------------------------------------------------------------------------------------------------------------------------------------------------------------------------------------------------------------------------------------------------------------------------------------------------------------------------------------------------------------------------------------------------------------------------------------------------------------------------------------------------------------------------------------------------------------------------------------------------------------------------------------------------------------------------------------------------------------------------------------------------------------------------------------------------------------------------------------------------------------------------------------------------------------------------------------------------------------------------------------------------------------------------------------------------------------------------------------------------------------------------------------------------------------------------------------------------------------------------------------------------------------------------------------------------------------------------------------------------------------------------------------------------------------------------------------------------------------------------------------------------------------------------------------------------------------------------------------------------------------------------------------------------------------------------------------------------------------------------------------------------------------------------------------------------------------------------------------------------------------------------------------------------------------------------------------------------------------------------------------------------------------------------------------------------------------------------------------------------------------------------------------------------------------------|
| <p><b>Peripheral Vascular Disease</b></p>                                                                                                                                                                                                                    | <p>'0400','41511','41512','41513','41519','4162','4400','4401','44020','44021','44022','44023','44024','44029','44030','44031','44032','4404','44100','44101','44102','44103','4411','4412','4413','4414','4415','4416','4417','4419','4420','4421','4422','4423','44281','44282','44283','44284','44289','4429','4431','44321','44322','44323','44324','44329','44381','44382','44389','4439','4440','44401','44409','4441','44421','44422','44481','44489','4449','44501','44502','44581','44589','4470','4471','4472','4473','4474','4475','4476','44770','44771','44772','44773','4478','4479','4480','449','45111','45119','45181','45183','4530','4532','4533','45340','45341','45342','45350','45351','45352','45372','45374','45375','45376','45377','4538','45382','45384','45385','45386','45387','4540','4542','45911','45913','45931','45933','5570','5571','5579','59381','7854',</p>                                                                                                                                                                                                                                                                                                                                                                                                                                                                                                                                                                                                                                                                                                                                                                                                                                                                                                                                                                                                                                                                                                                                                                                                                                                                                                                                                                                                                                                                                                                                                                                                                                                                                                                                                                                                                                                                                                                                                                                                                                                                                                                                                                                                                                                                                                                                                                                                                                                                                                                                                                                                                                                                                                                                                                                                                                                                                                                                                                                                                                                                                                                                                                                                                         |
| <p><b>Traumatic Brain Injury</b></p>                                                                                                                                                                                                                         | <p>'80000','80001','80002','80003','80004','80005','80006','80009','80010','80011','80012','80013','80014','80015','80016','80019','80020','80021','80022','80023','80024','80025','80026','80029','80030','80031','80032','80033','80034','80035','80036','80039','80040','80041','80042','80043','80044','80045','80046','80049','80050','80051','80052','80053','80054','80055','80056','80059','80060','80061','80062','80063','80064','80065','80066','80069','80070','80071','80072','80073','80074','80075','80076','80079','80080','80081','80082','80083','80084','80085','80086','80089','80090','80091','80092','80093','80094','80095','80096','80099','80100','80101','80102','80103','80104','80105','80106','80109','80110','80111','80112','80113','80114','80115','80116','80119','80120','80121','80122','80123','80124','80125','80126','80129','80130','80131','80132','80133','80134','80135','80136','80139','80140','80141','80142','80143','80144','80145','80146','80149','80150','80151','80152','80153','80154','80155','80156','80159','80160','80161','80162','80163','80164','80165','80166','80169','80170','80171','80172','80173','80174','80175','80176','80179','80180','80181','80182','80183','80184','80185','80186','80189','80190','80191','80192','80193','80194','80195','80196','80199','80200','80201','80202','80203','80204','80205','80206','80207','80208','80209','80300','80301','80302','80303','80304','80305','80306','80309','80310','80311','80312','80313','80314','80315','80316','80319','80320','80321','80322','80323','80324','80325','80326','80329','80330','80331','80332','80333','80334','80335','80336','80339','80340','80341','80342','80343','80344','80345','80346','80349','80350','80351','80352','80353','80354','80355','80356','80359','80360','80361','80362','80363','80364','80365','80366','80369','80370','80371','80372','80373','80374','80375','80376','80379','80380','80381','80382','80383','80384','80385','80386','80389','80390','80391','80392','80393','80394','80395','80396','80399','80400','80401','80402','80403','80404','80405','80406','80409','80410','80411','80412','80413','80414','80415','80416','80419','80420','80421','80422','80423','80424','80425','80426','80429','80430','80431','80432','80433','80434','80435','80436','80439','80440','80441','80442','80443','80444','80445','80446','80449','80450','80451','80452','80453','80454','80455','80456','80459','80460','80461','80462','80463','80464','80465','80466','80469','80470','80471','80472','80473','80474','80475','80476','80479','80480','80481','80482','80483','80484','80485','80486','80489','80490','80491','80492','80493','80494','80495','80496','80499','8502','8503','8504','85100','85101','85102','85103','85104','85105','85106','85109','85110','85111','85112','85113','85114','85115','85116','85119','85120','85121','85122','85123','85124','85125','85126','85129','85130','85131','85132','85133','85134','85135','85136','85139','85140','85141','85142','85143','85144','85145','85146','85149','85150','85151','85152','85153','85154','85155','85156','85159','85160','85161','85162','85163','85164','85165','85166','85169','85170','85171','85172','85173','85174','85175','85176','85179','85180','85181','85182','85183','85184','85185','85186','85189','85190','85191','85192','85193','85194','85195','85196','85199','85200','85201','85202','85203','85204','85205','85206','85209','85210','85211','85212','85213','85214','85215','85216','85219','85220','85221','85222','85223','85224','85225','85226','85229','85230','85231','85232','85233','85234','85235','85236','85239','85240','85241','85242','85243','85244','85245','85246','85249','85250','85251','85252','85253','85254','85255','85256','85259','85300','85301','85302','85303','85304','85305','85306','85309','85310','85311','85312','85313','85314','85315','85316','85319','85400','85401','85402','85403','85404','85405','85406','85409','85410','85411','85412','85413','85414','85415','85416','85419','9050','9070',</p> |
| <p><b>Amputee</b></p>                                                                                                                                                                                                                                        | <p>'3536','9059','99760','99761','99762','99769','V4970','V4971','V4972','V4973','V4974','V4975','V4976','V4977','V521',</p>                                                                                                                                                                                                                                                                                                                                                                                                                                                                                                                                                                                                                                                                                                                                                                                                                                                                                                                                                                                                                                                                                                                                                                                                                                                                                                                                                                                                                                                                                                                                                                                                                                                                                                                                                                                                                                                                                                                                                                                                                                                                                                                                                                                                                                                                                                                                                                                                                                                                                                                                                                                                                                                                                                                                                                                                                                                                                                                                                                                                                                                                                                                                                                                                                                                                                                                                                                                                                                                                                                                                                                                                                                                                                                                                                                                                                                                                                                                                                                                               |
| <p>Some diagnoses of alcohol abuse will be missing due to redaction of data data associated with addiction care for the years (2013-2014). See <a href="https://www.resdac.org/reconnect/articles/203">https://www.resdac.org/reconnect/articles/203</a></p> |                                                                                                                                                                                                                                                                                                                                                                                                                                                                                                                                                                                                                                                                                                                                                                                                                                                                                                                                                                                                                                                                                                                                                                                                                                                                                                                                                                                                                                                                                                                                                                                                                                                                                                                                                                                                                                                                                                                                                                                                                                                                                                                                                                                                                                                                                                                                                                                                                                                                                                                                                                                                                                                                                                                                                                                                                                                                                                                                                                                                                                                                                                                                                                                                                                                                                                                                                                                                                                                                                                                                                                                                                                                                                                                                                                                                                                                                                                                                                                                                                                                                                                                            |

**eTable 3.** Specific Drugs Included in Fracture-Associated and Fracture-Protective Drug Groups

| <b>Fracture Associated</b>                                                                                                                                                           |
|--------------------------------------------------------------------------------------------------------------------------------------------------------------------------------------|
| <b>Inhaled Steroids</b>                                                                                                                                                              |
| beclomethasone<br>budesonide<br>dexamethasone<br>flunisolide<br>fluticasone<br>mometasone<br>triamcinolone<br>ciclesonide                                                            |
| <b>Oral Steroids</b>                                                                                                                                                                 |
| betamethasone<br>budesonide<br>cortisone<br>dexamethasone<br>fludrocortisone<br>hydrocortisone<br>methylprednisolone<br>prednisolone<br>prednisone<br>triamcinolone                  |
| <b>Proton Pump Inhibitors</b>                                                                                                                                                        |
| dexlansoprazole<br>esomeprazole<br>lansoprazole<br>omeprazole<br>pantoprazole<br>rabeprazole                                                                                         |
| <b>H2 Antagonists/ Histamine 2 Receptor Antagonists</b>                                                                                                                              |
| cimetidine<br>famotidine<br>nizatidine<br>ranitidine<br>ranitidine bismuth citrate                                                                                                   |
| <b>SSRI/SNRI Selective Serotonin and Selective Noradrenergic Reuptake Inhibitors</b>                                                                                                 |
| citalopram<br>desvenlafaxine<br>escitalopram<br>FLUoxetine<br>fluvoxamine<br>PARoxetine<br>sertraline<br>venlafaxine<br>vortioxetine<br>levomilnacipran<br>milnacipran<br>DULoxetine |
| <b>Tricyclic Antidepressants</b>                                                                                                                                                     |
| amitriptyline<br>amoxapine<br>clomipramine<br>desipramine<br>imipramine<br>nortriptyline<br>protriptyline<br>trimipramine<br>doxepin                                                 |
| <b>Thiazolidinediones</b>                                                                                                                                                            |
| pioglitazone<br>rosiglitazone                                                                                                                                                        |

eTable 3 continued

|                                                                                                                                                                                                                                                                                                                                                               |
|---------------------------------------------------------------------------------------------------------------------------------------------------------------------------------------------------------------------------------------------------------------------------------------------------------------------------------------------------------------|
| <b>Anticonvulsants</b>                                                                                                                                                                                                                                                                                                                                        |
| felbamate<br>tiagabine<br>topiramate<br>vigabatrin<br>valproate<br>carbamazepine<br>eslicarbazepine<br>ethosuximide<br>ethotoin<br>ezogabine<br>fosphenytoin<br>gabapentin<br>lacosamide<br>lamotrigine<br>levetiracetam<br>mephenytoin<br>methsuximide<br>oxcarbazepine<br>perampanel<br>phensuximide<br>phenytoin<br>pregabalin<br>rufinamide<br>zonisamide |
| <b>Benzodiazepines</b>                                                                                                                                                                                                                                                                                                                                        |
| alprazolam<br>clordiazepoxide<br>clobazam<br>clonazepam<br>clorazepate<br>diazepam<br>estazolam<br>flurazepam<br>halazepam<br>lorazepam<br>midazolam<br>oxazepam<br>prazepam<br>quazepam<br>temazepam<br>triazolam                                                                                                                                            |
| <b>Barbiturates</b>                                                                                                                                                                                                                                                                                                                                           |
| butabarbital<br>butalbital<br>mephobarbital<br>pentobarbital<br>phenobarbital<br>secobarbital<br>primidone                                                                                                                                                                                                                                                    |

eTable 3 continued

|                                                               |
|---------------------------------------------------------------|
| <b>Opioids</b>                                                |
| alfentanil                                                    |
| butorphanol                                                   |
| codeine                                                       |
| dezocine                                                      |
| dihydrocodeine                                                |
| fentanyl                                                      |
| hydrocodone                                                   |
| hydromorphone                                                 |
| levorphanol                                                   |
| meperidine                                                    |
| methadone                                                     |
| morphine                                                      |
| morphine liposomal                                            |
| nalbuphine                                                    |
| opium                                                         |
| oxycodone                                                     |
| oxymorphone                                                   |
| paregoric                                                     |
| pentazocine                                                   |
| propoxyphene                                                  |
| remifentanil                                                  |
| sufentanil                                                    |
| tapentadol                                                    |
| tramadol                                                      |
| naloxone                                                      |
| buprenorphine                                                 |
| <b>Muscle relaxers</b>                                        |
| meprobamate                                                   |
| methocarbamol                                                 |
| carisoprodol                                                  |
| <b>1st Generation Antihistamines/ H1 Receptor Antagonists</b> |
| azatadine                                                     |
| bromodiphenhydramine                                          |
| brompheniramine                                               |
| carbinoxamine                                                 |
| chlorcyclizine                                                |
| chlorpheniramine                                              |
| clemastine                                                    |
| cyclizine                                                     |
| cyproheptadine                                                |
| dexbrompheniramine                                            |
| dexchlorpheniramine                                           |
| dimenhydrinate                                                |
| diphenhydramine                                               |
| doxylamine                                                    |
| hydroxyzine                                                   |
| meclizine                                                     |
| pheniramine                                                   |
| promethazine                                                  |
| pyrilamine                                                    |
| triprolidine                                                  |
| triethylperazine                                              |

eTable 3 continued

|                                                                                                                                                                                                                                                                                                                        |
|------------------------------------------------------------------------------------------------------------------------------------------------------------------------------------------------------------------------------------------------------------------------------------------------------------------------|
| <b>Anti- Parkinson's Disease</b>                                                                                                                                                                                                                                                                                       |
| amantadine<br>apomorphine<br>bromocriptine<br>cabergoline<br>carbidopa<br>entacapone<br>levodopa<br>pergolide<br>pramipexole<br>rasagiline<br>ropinirole<br>rotigotine<br>selegiline<br>tolcapone<br>dihydroergocryptine<br>benztropine<br>biperiden<br>orphenadrine<br>procyclidine<br>trihexyphenidyl<br>profenamine |
| <b>Centrally-Acting Antihypertensives</b>                                                                                                                                                                                                                                                                              |
| clonidine<br>guanabenz<br>guanfacine<br>methyldopa<br>tizanidine                                                                                                                                                                                                                                                       |
| <b>1st-Generation Antipsychotics (FGAP)</b>                                                                                                                                                                                                                                                                            |
| chlorpromazine<br>droperidol<br>fluphenazine<br>haloperidol<br>loxapine<br>mesoridazine<br>methotrimeprazine<br>molindone<br>perphenazine<br>pimozide<br>prochlorperazine<br>thioridazine<br>thiothixene<br>trifluoperazine<br>triflupromazine                                                                         |
| <b>2nd-Generation Antipsychotics (SGAP)</b>                                                                                                                                                                                                                                                                            |
| aripiprazole<br>asenapine<br>clozapine<br>iloperidone<br>lurasidone<br>olanzapine<br>paliperidone<br>quetiapine<br>risperidone<br>ziprasidone<br>brexpiprazole<br>cariprazine<br>pimavanserin                                                                                                                          |

eTable 3 continued

|                                                                                                                                                                                                                                                                                                                          |
|--------------------------------------------------------------------------------------------------------------------------------------------------------------------------------------------------------------------------------------------------------------------------------------------------------------------------|
| <b>Nitrates* (do not include sublingual tablets, oral and transdermal only)</b>                                                                                                                                                                                                                                          |
| erythryl tetranitrate<br>pentaerythritol<br>nitroglycerin<br>isosorbide dinitrate<br>isosorbide mononitrate                                                                                                                                                                                                              |
| <b>Loop Diuretics</b>                                                                                                                                                                                                                                                                                                    |
| bumetanide<br>furosemide<br>torsemide<br>ethacrynic acid                                                                                                                                                                                                                                                                 |
| <b>Thiazide and Thiazide-like Diuretics</b>                                                                                                                                                                                                                                                                              |
| bendroflumethiazide<br>chlorothiazide<br>chlorthalidone<br>hydrochlorothiazide<br>indapamide<br>methyclothiazide<br>metolazone<br>polythiazide<br>benzthiazide                                                                                                                                                           |
| <b>Sedative Hypnotics</b>                                                                                                                                                                                                                                                                                                |
| acetylcarbromal<br>busPIRone<br>chloral hydrate<br>chlormezanone<br>doxepin<br>doxylamine<br>ethchlorvynol<br>hydrOXYzine<br>melatonin<br>meprobamate<br>paraldehyde<br>pyrilamine<br>ramelteon<br>sodium oxybate<br>tasimelteon<br>dichloralphenazone<br>suvorexant<br>eszopiclone<br>zaleplon<br>zolpidem<br>zopiclone |

eTable 3 continued

|                                                                                                                                                                                                                                                                                                                                                                              |
|------------------------------------------------------------------------------------------------------------------------------------------------------------------------------------------------------------------------------------------------------------------------------------------------------------------------------------------------------------------------------|
| <b>Fracture Protective Drugs</b>                                                                                                                                                                                                                                                                                                                                             |
| <b>Systemic Estrogens</b>                                                                                                                                                                                                                                                                                                                                                    |
| conjugated estrogens<br>esterified estrogens<br>estradiol<br>estradiol<br>estradiol<br>estradiol<br>estropipate<br>estrone<br>ethinyl estradiol<br>ethinyl estradiol<br>synthetic conjugated estrogens, A<br>synthetic conjugated estrogens, B<br>estriol                                                                                                                    |
| <b>Bisphosphonates</b>                                                                                                                                                                                                                                                                                                                                                       |
| alendronate<br>etidronate<br>ibandronate<br>risedronate<br>tiludronate<br>zoledronate<br>zoledronate<br>zoledronate<br>zoledronate<br>ibandronate<br>etidronate<br>pamidronate                                                                                                                                                                                               |
| <b>Calcitonin</b>                                                                                                                                                                                                                                                                                                                                                            |
| calcitonin<br>calcitonin<br>calcitonin, human                                                                                                                                                                                                                                                                                                                                |
| <b>Monoclonal Antibody (RANK L)</b>                                                                                                                                                                                                                                                                                                                                          |
| denosumab                                                                                                                                                                                                                                                                                                                                                                    |
| <b>Parathyroid Hormone (PTH)</b>                                                                                                                                                                                                                                                                                                                                             |
| teriparatide                                                                                                                                                                                                                                                                                                                                                                 |
| <b>Selective Estrogen Receptor Modulators</b>                                                                                                                                                                                                                                                                                                                                |
| raloxifene<br>lasofoxifene<br>ospemifene<br>bazedoxifene<br>tamoxifen                                                                                                                                                                                                                                                                                                        |
| <b>Beta Blockers</b>                                                                                                                                                                                                                                                                                                                                                         |
| acebutolol<br>atenolol<br>betaxolol<br>bisoprolol<br>carteolol<br>carvedilol<br>labetalol<br>metoprolol<br>nadolol<br>nebivolol<br>penbutolol<br>pindolol<br>propranolol<br>timolol                                                                                                                                                                                          |
| All fracture associated drugs were identified use National Drug Code variable in Medicare Part D Drug Event file and the Multum LexiComp Basic database (Lexicomp). Denver: Cerner Multum. Zoledronic Acid receipt by infusion was also ascertained from Carrier file using Healthcare Common Procedure Coding System codes: j3487, j3488, j3489, Q2051, J1740, J1436, J2430 |



eTable 4. Descriptive Distribution of Drug Use Over Study Period by Sex

Cohort total = 2,646,255 beneficiaries 1,615,613 women, 1,030,642 men, total observation years = 11,286,768; 63.14% women, 36.86% men

| Table 4a: Women                                                               |                           |                                    |                            |                                               |                    |        |
|-------------------------------------------------------------------------------|---------------------------|------------------------------------|----------------------------|-----------------------------------------------|--------------------|--------|
|                                                                               | Cohort Drug Receipt       |                                    |                            | Individual Level Drug Receipt in Person Years |                    |        |
|                                                                               | Percent with Any Exposure | Total Time Exposed in Person Years | % of Observed Time Exposed | Mean                                          | Standard Deviation | Median |
| <b>Fracture Associated Drugs (alone or in combination with other FAD use)</b> |                           |                                    |                            |                                               |                    |        |
| Thiazide Diuretics                                                            | 40.49                     | 1,447,094                          | 20.32                      | 2.21                                          | 2.15               | 1.28   |
| Proton Pump Inhibitors                                                        | 36.83                     | 941,159                            | 13.22                      | 1.58                                          | 1.84               | 0.89   |
| SSRI/SNRI                                                                     | 27.76                     | 763,953                            | 10.73                      | 1.70                                          | 1.93               | 1.00   |
| Loop Diuretics                                                                | 22.37                     | 522,112                            | 7.33                       | 1.44                                          | 1.78               | 0.69   |
| Opioids                                                                       | 54.99                     | 463,419                            | 6.51                       | 0.52                                          | 1.13               | 0.08   |
| Anticonvulsants                                                               | 18.32                     | 334,594                            | 4.70                       | 1.13                                          | 1.60               | 0.39   |
| Sedative Hypnotics                                                            | 16.94                     | 247,517                            | 3.48                       | 0.90                                          | 1.42               | 0.25   |
| H2 Receptor Antagonists                                                       | 11.20                     | 174,796                            | 2.46                       | 0.97                                          | 1.40               | 0.30   |
| Nitrates                                                                      | 10.73                     | 170,486                            | 2.39                       | 0.98                                          | 1.65               | 0.19   |
| Inhaled Glucocorticoids                                                       | 9.58                      | 154,467                            | 2.17                       | 1.00                                          | 1.39               | 0.39   |
| Oral Glucocorticoids                                                          | 33.92                     | 146,070                            | 2.05                       | 0.27                                          | 0.74               | 0.04   |
| Tricyclic Antidepressants                                                     | 6.79                      | 145,666                            | 2.05                       | 1.33                                          | 1.84               | 0.39   |
| Benzodiazepine                                                                | 17.58                     | 129,405                            | 1.82                       | 0.46                                          | 0.63               | 0.20   |
| 2nd Generation Antipsychotics                                                 | 6.04                      | 128,523                            | 1.81                       | 1.32                                          | 1.69               | 0.59   |
| Antiparkinson Agents                                                          | 5.32                      | 115,705                            | 1.63                       | 1.35                                          | 1.80               | 0.49   |
| Central Acting Antihypertensives                                              | 6.89                      | 115,664                            | 1.62                       | 1.04                                          | 1.62               | 0.26   |
| Thiazolidinediones                                                            | 4.13                      | 109,814                            | 1.54                       | 1.65                                          | 1.70               | 1.01   |
| 1st Generation Antihistamines                                                 | 17.60                     | 56,849                             | 0.80                       | 0.20                                          | 0.54               | 0.05   |
| Muscle Relaxers                                                               | 3.74                      | 22,009                             | 0.31                       | 0.36                                          | 0.83               | 0.10   |
| 1st Generation Antipsychotics                                                 | 3.12                      | 20,411                             | 0.29                       | 0.41                                          | 1.09               | 0.03   |
| Barbiturates                                                                  | 1.41                      | 18,367                             | 0.26                       | 0.81                                          | 1.46               | 0.13   |
| <b>Top 20 Most Common Combinations</b>                                        |                           |                                    |                            |                                               |                    |        |
| PPI & Thiazide Diuretics                                                      | 13.66                     | 273,718                            | 3.84                       | 1.24                                          | 1.54               | 0.60   |
| PPI & SSRI/SNRI                                                               | 11.58                     | 221,779                            | 3.11                       | 1.19                                          | 1.50               | 0.58   |
| SSRI/SNRI & Thiazide Diuretics                                                | 9.57                      | 198,221                            | 2.78                       | 1.28                                          | 1.58               | 0.64   |
| PPI & Opioids                                                                 | 16.57                     | 147,759                            | 2.08                       | 0.55                                          | 1.04               | 0.11   |
| PPI & Loop Diuretics                                                          | 8.97                      | 145,621                            | 2.05                       | 1.00                                          | 1.36               | 0.40   |
| Thiazide Diuretics & Opioids                                                  | 17.57                     | 128,398                            | 1.80                       | 0.45                                          | 0.93               | 0.09   |
| SSRI/SNRI & Opioids                                                           | 12.99                     | 125,785                            | 1.77                       | 0.60                                          | 1.11               | 0.11   |
| Opioids & Loop Diuretics                                                      | 6.62                      | 112,616                            | 1.58                       | 1.05                                          | 1.42               | 0.42   |
| PPI & Anticonvulsants                                                         | 7.21                      | 102,539                            | 1.44                       | 0.88                                          | 1.26               | 0.30   |
| Anticonvulsants & SSRI/SNRI                                                   | 6.10                      | 96,376                             | 1.35                       | 0.98                                          | 1.37               | 0.36   |
| Opioids & Loop Diuretics                                                      | 10.24                     | 91,040                             | 1.28                       | 0.55                                          | 1.00               | 0.12   |
| Anticonvulsants & Thiazide Diuretics                                          | 6.27                      | 86,716                             | 1.22                       | 0.86                                          | 1.26               | 0.30   |
| Anticonvulsants & Opioids                                                     | 9.10                      | 85,358                             | 1.20                       | 0.58                                          | 1.05               | 0.13   |
| SSRI/SNRI & Sedative Hypnotics                                                | 5.40                      | 74,537                             | 1.05                       | 0.85                                          | 1.27               | 0.30   |
| PPI & Sedative Hypnotics                                                      | 5.90                      | 72,010                             | 1.01                       | 0.76                                          | 1.16               | 0.24   |
| Thiazide Diuretics & Loop Diuretics                                           | 7.02                      | 69,002                             | 0.97                       | 0.61                                          | 0.99               | 0.22   |
| Sedative Hypnotics & Thiazide Diuretics                                       | 5.31                      | 66,484                             | 0.93                       | 0.78                                          | 1.21               | 0.23   |
| Anticonvulsants & Loop Diuretics                                              | 4.52                      | 62,889                             | 0.88                       | 0.86                                          | 1.26               | 0.30   |
| SSRI/SNRI & SGAP                                                              | 3.33                      | 61,350                             | 0.86                       | 1.14                                          | 1.50               | 0.50   |
| Nitrates & Loop Diuretics                                                     | 3.79                      | 54,180                             | 0.76                       | 0.89                                          | 1.38               | 0.22   |
| 0 FAD                                                                         | 100                       |                                    |                            |                                               |                    |        |
| 1 FAD                                                                         | 84.96                     |                                    |                            |                                               |                    |        |
| 2 FAD                                                                         | 61.90                     |                                    |                            |                                               |                    |        |
| 3+ FAD                                                                        | 39.62                     |                                    |                            |                                               |                    |        |
| <b>Non-Fracture Associated Drugs</b>                                          |                           |                                    |                            |                                               |                    |        |
| 0 Non-FAD                                                                     | 66.46                     |                                    |                            |                                               |                    |        |
| 1 Non-FAD                                                                     | 51.52                     |                                    |                            |                                               |                    |        |
| 2 Non-FAD                                                                     | 59.51                     |                                    |                            |                                               |                    |        |
| 3+ Non-FAD                                                                    | 69.16                     |                                    |                            |                                               |                    |        |
| <b>Drugs protective of fracture</b>                                           |                           |                                    |                            |                                               |                    |        |
| Beta Blockers                                                                 | 50.24                     | 1,575,275                          | 22.11                      | 1.94                                          | 2.03               | 1.11   |
| Osteoporosis medications                                                      | 25.92                     | 559,704                            | 7.85                       | 1.34                                          | 1.56               | 0.69   |
| Estrogen                                                                      | 18.00                     | 369,450                            | 5.18                       | 1.27                                          | 1.62               | 0.58   |

eTable 4 continued

| Table 4b: Men                                                                      |                           |                                    |                            |                                               |                    |        |
|------------------------------------------------------------------------------------|---------------------------|------------------------------------|----------------------------|-----------------------------------------------|--------------------|--------|
|                                                                                    | Cohort Drug Receipt       |                                    |                            | Individual Level Drug Receipt in Person Years |                    |        |
|                                                                                    | Percent with Any Exposure | Total Time Exposed in Person Years | % of Observed Time Exposed | Mean                                          | Standard Deviation | Median |
| <b>Fracture Associated Drugs (not exclusive to other concurrent FAD use)</b>       |                           |                                    |                            |                                               |                    |        |
| Thiazide Diuretics                                                                 | 31.02                     | 617,566                            | 14.85                      | 1.93                                          | 1.98               | 1.13   |
| Proton Pump Inhibitors                                                             | 29.86                     | 433,643                            | 10.43                      | 1.41                                          | 1.71               | 0.73   |
| Loop Diuretics                                                                     | 18.59                     | 246,196                            | 5.92                       | 1.28                                          | 1.62               | 0.59   |
| SSRI/SNRI                                                                          | 15.73                     | 227,489                            | 5.47                       | 1.40                                          | 1.71               | 0.75   |
| Opioids                                                                            | 50.11                     | 184,621                            | 4.44                       | 0.36                                          | 0.92               | 0.05   |
| Anticonvulsants                                                                    | 14.08                     | 152,255                            | 3.66                       | 1.05                                          | 1.52               | 0.36   |
| Nitrates                                                                           | 13.55                     | 110,253                            | 2.65                       | 0.79                                          | 1.44               | 0.16   |
| Sedative Hypnotics                                                                 | 12.69                     | 106,411                            | 2.56                       | 0.81                                          | 1.30               | 0.21   |
| Thiazolidinediones                                                                 | 5.11                      | 87,790                             | 2.11                       | 1.67                                          | 1.69               | 1.06   |
| H2 Receptor Antagonists                                                            | 8.19                      | 82,587                             | 1.99                       | 0.98                                          | 1.42               | 0.30   |
| Inhaled Glucocorticoids                                                            | 8.25                      | 81,502                             | 1.96                       | 0.96                                          | 1.33               | 0.39   |
| Oral Glucocorticoids                                                               | 29.30                     | 72,475                             | 1.74                       | 0.24                                          | 0.66               | 0.04   |
| Antiparkinson Agents                                                               | 4.96                      | 67,235                             | 1.62                       | 1.32                                          | 1.72               | 0.55   |
| 2nd Generation Antipsychotics                                                      | 4.43                      | 53,465                             | 1.29                       | 1.17                                          | 1.58               | 0.49   |
| Benzodiazepine                                                                     | 11.22                     | 49,972                             | 1.20                       | 0.43                                          | 0.63               | 0.18   |
| Central Acting Antihypertensives                                                   | 4.38                      | 42,186                             | 1.02                       | 0.93                                          | 1.48               | 0.22   |
| Tricyclic Antidepressants                                                          | 3.64                      | 39,298                             | 0.95                       | 1.05                                          | 1.57               | 0.30   |
| 1st Generation Antihistamines                                                      | 10.52                     | 18,498                             | 0.45                       | 0.17                                          | 0.48               | 0.04   |
| Barbiturates                                                                       | 1.11                      | 11,530                             | 0.28                       | 1.01                                          | 1.52               | 0.30   |
| Muscle Relaxers                                                                    | 2.83                      | 9,003                              | 0.22                       | 0.31                                          | 0.74               | 0.10   |
| 1st Generation Antipsychotics                                                      | 2.00                      | 8,677                              | 0.21                       | 0.42                                          | 1.09               | 0.04   |
| <b>Top 20 Most Common Combinations (not exclusive to other concurrent FAD use)</b> |                           |                                    |                            |                                               |                    |        |
| PPI & Thiazide Diuretics                                                           | 8.36                      | 95,544                             | 2.30                       | 1.11                                          | 1.42               | 0.52   |
| PPI & SSRI/SNRI                                                                    | 5.67                      | 58,322                             | 1.40                       | 1.00                                          | 1.33               | 0.42   |
| PPI & Loop Diuretics                                                               | 6.15                      | 53,634                             | 1.29                       | 0.85                                          | 1.20               | 0.30   |
| PPI & Opioids                                                                      | 11.44                     | 47,514                             | 1.14                       | 0.40                                          | 0.87               | 0.07   |
| SSRI/SNRI & Thiazide Diuretics                                                     | 4.02                      | 43,313                             | 1.04                       | 1.05                                          | 1.37               | 0.47   |
| Thiazide Diuretics & Opioids                                                       | 11.64                     | 39,073                             | 0.94                       | 0.33                                          | 0.77               | 0.05   |
| PPI & Anticonvulsants                                                              | 4.58                      | 36,900                             | 0.89                       | 0.78                                          | 1.15               | 0.30   |
| SSRI/SNRI & Loop Diuretics                                                         | 3.62                      | 32,960                             | 0.79                       | 0.88                                          | 1.24               | 0.33   |
| SSRI/SNRI & Opioids                                                                | 6.36                      | 30,711                             | 0.74                       | 0.47                                          | 0.94               | 0.09   |
| Anticonvulsants & Opioids                                                          | 6.28                      | 30,446                             | 0.73                       | 0.47                                          | 0.92               | 0.10   |
| Anticonvulsants & Thiazide Diuretics                                               | 3.69                      | 30,350                             | 0.73                       | 0.80                                          | 1.19               | 0.30   |
| Opioids & Loop Diuretics                                                           | 7.30                      | 29,580                             | 0.71                       | 0.39                                          | 0.81               | 0.08   |
| Anticonvulsants & SSRI/SNRI                                                        | 3.22                      | 29,400                             | 0.71                       | 0.89                                          | 1.29               | 0.30   |
| Thiazide Diuretics & Loop Diuretics                                                | 4.75                      | 27,869                             | 0.67                       | 0.57                                          | 0.92               | 0.21   |
| Nitrates & Loop Diuretics                                                          | 3.64                      | 27,451                             | 0.66                       | 0.73                                          | 1.20               | 0.18   |
| PPI & Nitrates                                                                     | 4.13                      | 27,228                             | 0.66                       | 0.64                                          | 1.13               | 0.15   |
| PPI & Sedative Hypnotics                                                           | 3.83                      | 27,098                             | 0.65                       | 0.69                                          | 1.08               | 0.21   |
| Anticonvulsants & Loop Diuretics                                                   | 3.10                      | 25,203                             | 0.61                       | 0.79                                          | 1.18               | 0.28   |
| TZD & Thiazide Diuretics                                                           | 1.75                      | 23,445                             | 0.56                       | 1.30                                          | 1.44               | 0.84   |
| SSRI/SNRI & SGAP                                                                   | 2.12                      | 22,036                             | 0.53                       | 1.01                                          | 1.40               | 0.41   |
| 0 FAD                                                                              | 100                       |                                    |                            |                                               |                    |        |
| 1 FAD                                                                              | 80.35                     |                                    |                            |                                               |                    |        |
| 2 FAD                                                                              | 51.77                     |                                    |                            |                                               |                    |        |
| 3+ FAD                                                                             | 28.54                     |                                    |                            |                                               |                    |        |
| <b>Non-Fracture Associated Drugs</b>                                               |                           |                                    |                            |                                               |                    |        |
| 0 Non-FAD                                                                          | 64.79                     |                                    |                            |                                               |                    |        |
| 1 Non-FAD                                                                          | 43.29                     |                                    |                            |                                               |                    |        |
| 2 Non-FAD                                                                          | 52.03                     |                                    |                            |                                               |                    |        |
| 3+ Non-FAD                                                                         | 68.62                     |                                    |                            |                                               |                    |        |
| <b>Drugs protective of fracture</b>                                                |                           |                                    |                            |                                               |                    |        |
| Beta Blockers                                                                      | 42.45                     | 912,897                            | 21.94                      | 2.09                                          | 2.09               | 1.18   |
| Osteoporosis medications                                                           | 3.13                      | 39,563                             | 0.95                       | 1.23                                          | 1.49               | 0.59   |
| Estrogen                                                                           | 0.10                      | 743                                | 0.02                       | 0.71                                          | 1.07               | 0.28   |

Tables present distribution of use of the 21 fracture associated drugs (FADs) of interest, Non-FADs, and three categories of drugs protective of fracture including: 1. Osteoporosis treatments: bisphosphonates, calcitonin, denosumab and parathyroid hormone 2. Estrogens: systemic estrogens and selective estrogen receptor modulators, and 3. Beta-blockers. SSRI/SNRI =combined drug group of selective serotonin reuptake inhibitors and selective norepinephrine reuptake inhibitors. Sedative Hypnotics include non-benzodiazepine drugs only. For FADs, status of receipt of 21 single drugs (1 FAD) and 210 concurrent drug pairs (2 FAD) is classified for each person, for each day of observation. 3+ FAD is a classification of person days with 3 or more concurrent FADs. The same approach was taken to identify 552 non-FAD exposures; status of receipt of any 1 non-FAD exposure (1 Non-FAD), 2 concurrent non-FAD exposures (2 Non-FAD), 3+ Non-FAD is a classification of person days with 3 or more concurrent Non-FADs. Double exposures with population-relevant risk are italicized.

**eTable 5.** Number and Category of Fracture-Associated Drug Group Exposures Included in Drug-Specific Models

|                                                                                                                                                                                                                        | Women      | Men        |
|------------------------------------------------------------------------------------------------------------------------------------------------------------------------------------------------------------------------|------------|------------|
| Single Fracture Associated Drug Groups Possible                                                                                                                                                                        | 21         | 21         |
| Single Fracture Associated Drug Groups Excluded                                                                                                                                                                        | 0          | 0          |
| <b>Single Fracture Associated Drug Groups Included in Models</b>                                                                                                                                                       | <b>21</b>  | <b>21</b>  |
| Double Fracture Associated Drug Groups Possible                                                                                                                                                                        | 210        | 210        |
| Double Fracture Associated Drug Groups Excluded (due to <100 PY exposure time)                                                                                                                                         | 27         | 45         |
| <b>Double Fracture Associated Drug Groups Included in Models</b>                                                                                                                                                       | <b>183</b> | <b>165</b> |
| <b>Total Specific Fracture Associated Drug Group Exposures Estimated in Model</b>                                                                                                                                      | <b>204</b> | <b>186</b> |
| Aggregated other exposure (double exposures pairs with < 100PY observation)                                                                                                                                            | 1          | 1          |
| Indicator for Any Three-or-more Fracture Associated Drug Group Exposure Days                                                                                                                                           | 1          | 1          |
| <b>Total Fracture Associated Drug Group Exposure Indicators Included in Models</b>                                                                                                                                     | <b>206</b> | <b>188</b> |
| For statistical stability, within each sex-specific cohort, all exposure pairs for which we had less than 100 total person years of observation, were aggregated into an "FAD pairs with < 100 PY" indicator variable. |            |            |



## eTable 7. Cox Proportional Hazard Model Output: Hip Fracture Risk Associated With Fracture-Associated Drugs Among Women

In 20% Medicare sample, person-years of exposure and crude fracture rate per exposure group, adjusted for sociodemographic factors, comorbidities, non-fracture-associated drug use (person-years, 7 126 266).

|                                             |              |                                              | Cox Regression Model (Hip Fracture n = 47,386) |                                     |                                      |           |                                    |
|---------------------------------------------|--------------|----------------------------------------------|------------------------------------------------|-------------------------------------|--------------------------------------|-----------|------------------------------------|
| Parameter                                   | Person Years | Fracture Rate<br>(# Fracture<br>per 1000 PY) | Hazard<br>Ratio<br>(HR)                        | Lower 95%<br>Confidence<br>Interval | Higher 95%<br>Confidence<br>Interval | p-value   | False<br>Discovery<br>Rate p-value |
| <b>Age (reference 67-69)</b>                |              |                                              |                                                |                                     |                                      |           |                                    |
| Age 70-74                                   | -            | -                                            | 1.24                                           | 1.19                                | 1.29                                 | 2.70E-24  | 1.30E-23                           |
| Age 75-79                                   | -            | -                                            | 2.10                                           | 2.02                                | 2.18                                 | 1.00E-300 | 4.00E-299                          |
| Age 80-84                                   | -            | -                                            | 3.24                                           | 3.12                                | 3.37                                 | 0.00E+00  | 0.00E+00                           |
| Age 85+                                     | -            | -                                            | 5.09                                           | 4.90                                | 5.28                                 | 0.00E+00  | 0.00E+00                           |
| <b>Race/Ethnicity (reference white)</b>     |              |                                              |                                                |                                     |                                      |           |                                    |
| Black                                       | -            | -                                            | 0.51                                           | 0.49                                | 0.54                                 | 3.00E-192 | 7.00E-191                          |
| Hispanic                                    | -            | -                                            | 0.81                                           | 0.77                                | 0.84                                 | 7.50E-21  | 3.00E-20                           |
| Asian                                       | -            | -                                            | 0.78                                           | 0.73                                | 0.83                                 | 1.20E-13  | 3.10E-13                           |
| Other                                       | -            | -                                            | 1.07                                           | 0.98                                | 1.17                                 | 1.20E-01  | 1.40E-01                           |
| Low Income Subsidy                          | -            | -                                            | 1.02                                           | 0.98                                | 1.06                                 | 3.40E-01  | 3.80E-01                           |
| <b>Original Medicare eligibility (%)</b>    |              |                                              |                                                |                                     |                                      |           |                                    |
| Disability                                  | -            | -                                            | 1.28                                           | 0.71                                | 2.30                                 | 4.20E-01  | 4.60E-01                           |
| Aged                                        | -            | -                                            | 1.09                                           | 0.60                                | 1.97                                 | 7.70E-01  | 8.00E-01                           |
| Long term care                              | -            | -                                            | 1.33                                           | 1.29                                | 1.36                                 | 7.00E-114 | 1.00E-112                          |
| Dual eligible                               | -            | -                                            | 0.89                                           | 0.85                                | 0.92                                 | 3.90E-09  | 8.00E-09                           |
| <b>Chronic Conditions</b>                   |              |                                              |                                                |                                     |                                      |           |                                    |
| Osteoporosis/Osteopenia                     | -            | -                                            | 3.28                                           | 3.21                                | 3.36                                 | 0.00E+00  | 0.00E+00                           |
| Dementia                                    | -            | -                                            | 3.46                                           | 3.38                                | 3.55                                 | 0.00E+00  | 0.00E+00                           |
| Obesity                                     | -            | -                                            | 1.00                                           | 0.96                                | 1.04                                 | 8.60E-01  | 8.80E-01                           |
| Depression                                  | -            | -                                            | 1.22                                           | 1.19                                | 1.26                                 | 7.40E-49  | 5.50E-48                           |
| Serious Mental Illness                      | -            | -                                            | 1.22                                           | 1.16                                | 1.27                                 | 9.90E-19  | 3.50E-18                           |
| Alcohol Abuse                               | -            | -                                            | 1.90                                           | 1.63                                | 2.21                                 | 1.70E-16  | 5.30E-16                           |
| Tobacco/Chronic Lung Disease                | -            | -                                            | 2.17                                           | 2.12                                | 2.23                                 | 0.00E+00  | 0.00E+00                           |
| Diabetes                                    | -            | -                                            | 0.93                                           | 0.91                                | 0.95                                 | 9.90E-14  | 2.60E-13                           |
| Liver Disease                               | -            | -                                            | 1.03                                           | 0.96                                | 1.11                                 | 3.80E-01  | 4.20E-01                           |
| Pancreatic Disease                          | -            | -                                            | 0.87                                           | 0.83                                | 0.91                                 | 3.10E-10  | 6.60E-10                           |
| Inflammatory Bowel Disease                  | -            | -                                            | 0.80                                           | 0.75                                | 0.86                                 | 1.40E-11  | 3.30E-11                           |
| Rheumatologic Disease                       | -            | -                                            | 0.97                                           | 0.94                                | 0.99                                 | 7.50E-03  | 1.00E-02                           |
| Spinal Cord Disease or Injury               | -            | -                                            | 1.11                                           | 1.06                                | 1.16                                 | 3.10E-05  | 5.20E-05                           |
| Serious Neurologic Disease                  | -            | -                                            | 0.96                                           | 0.94                                | 0.99                                 | 4.50E-03  | 6.20E-03                           |
| Parkinson's/Huntington's Disease            | -            | -                                            | 0.86                                           | 0.82                                | 0.90                                 | 4.20E-11  | 9.30E-11                           |
| Seizure Disorder                            | -            | -                                            | 0.84                                           | 0.81                                | 0.87                                 | 5.60E-20  | 2.10E-19                           |
| Congestive Heart Failure                    | -            | -                                            | 0.96                                           | 0.94                                | 0.98                                 | 1.20E-04  | 1.80E-04                           |
| Coronary Artery Disease                     | -            | -                                            | 0.95                                           | 0.93                                | 0.98                                 | 5.60E-05  | 9.00E-05                           |
| Cerebrovascular Disease                     | -            | -                                            | 0.92                                           | 0.89                                | 0.94                                 | 1.80E-12  | 4.40E-12                           |
| Peripheral Vascular Disease                 | -            | -                                            | 0.91                                           | 0.89                                | 0.93                                 | 6.20E-19  | 2.20E-18                           |
| Traumatic Brain Injury                      | -            | -                                            | 1.18                                           | 1.13                                | 1.23                                 | 3.60E-14  | 9.60E-14                           |
| Amputee                                     | -            | -                                            | 1.02                                           | 0.90                                | 1.14                                 | 7.90E-01  | 8.20E-01                           |
| Estrogen                                    | -            | -                                            | 0.83                                           | 0.79                                | 0.87                                 | 8.70E-15  | 2.40E-14                           |
| Osteoporosis medications                    | -            | -                                            | 1.14                                           | 1.10                                | 1.17                                 | 3.30E-18  | 1.10E-17                           |
| Beta Blockers                               | -            | -                                            | 1.35                                           | 1.32                                | 1.38                                 | 3.00E-177 | 6.00E-176                          |
| <b>Single FAD Exposures</b>                 |              |                                              |                                                |                                     |                                      |           |                                    |
| Thiazide Diuretics                          | 733,478      | 4.35                                         | 1.74                                           | 1.67                                | 1.82                                 | 5.00E-147 | 9.00E-146                          |
| Proton Pump Inhibitors (PPI)                | 252,621      | 5.30                                         | 1.71                                           | 1.62                                | 1.82                                 | 1.20E-73  | 1.10E-72                           |
| SSRI/SNRI                                   | 185,004      | 8.98                                         | 2.32                                           | 2.20                                | 2.44                                 | 9.00E-207 | 2.00E-205                          |
| Loop Diuretics                              | 146,816      | 10.97                                        | 2.45                                           | 2.32                                | 2.59                                 | 3.00E-222 | 8.00E-221                          |
| Opioids                                     | 81,726       | 11.45                                        | 3.26                                           | 3.04                                | 3.49                                 | 2.00E-253 | 6.00E-252                          |
| Anticonvulsants                             | 60,055       | 7.51                                         | 2.24                                           | 2.04                                | 2.47                                 | 2.60E-61  | 2.10E-60                           |
| Sedative Hypnotics                          | 53,415       | 4.79                                         | 1.59                                           | 1.41                                | 1.81                                 | 2.10E-13  | 5.30E-13                           |
| Inhaled Glucocorticoids                     | 40,444       | 5.29                                         | 1.79                                           | 1.57                                | 2.06                                 | 4.10E-17  | 1.30E-16                           |
| H2 Receptor Antagonists (H2RA)              | 37,878       | 5.97                                         | 1.59                                           | 1.39                                | 1.81                                 | 7.50E-12  | 1.80E-11                           |
| Oral Glucocorticoids                        | 37,674       | 7.59                                         | 2.29                                           | 2.03                                | 2.58                                 | 9.40E-43  | 6.40E-42                           |
| Nitrates                                    | 32,143       | 7.44                                         | 1.62                                           | 1.43                                | 1.85                                 | 2.20E-13  | 5.50E-13                           |
| Tricyclic Antidepressants (TCA)             | 30,279       | 4.56                                         | 1.60                                           | 1.35                                | 1.89                                 | 4.30E-08  | 8.30E-08                           |
| Thiazolidinediones (TZD)                    | 29,469       | 6.11                                         | 2.62                                           | 2.26                                | 3.04                                 | 4.10E-37  | 2.70E-36                           |
| Benzodiazepine                              | 25,085       | 7.10                                         | 2.38                                           | 2.05                                | 2.77                                 | 3.10E-30  | 1.90E-29                           |
| Central Acting Antihypertensives (CAAH)     | 20,473       | 5.47                                         | 1.67                                           | 1.39                                | 2.01                                 | 7.60E-08  | 1.50E-07                           |
| 2nd Generation Antipsychotics (SGAP)        | 19,480       | 20.89                                        | 2.50                                           | 2.26                                | 2.76                                 | 5.00E-71  | 4.60E-70                           |
| Anti Parkinson's Agents                     | 19,373       | 12.18                                        | 3.29                                           | 2.89                                | 3.76                                 | 2.50E-70  | 2.20E-69                           |
| 1st Generation Antihistamines (H1 Blockers) | 12,368       | 7.60                                         | 1.99                                           | 1.62                                | 2.44                                 | 3.50E-11  | 7.90E-11                           |
| Barbiturates                                | 3,308        | 10.58                                        | 2.74                                           | 1.97                                | 3.82                                 | 2.60E-09  | 5.40E-09                           |
| 1st Generation Antipsychotics (FGAP)        | 3,230        | 8.36                                         | 1.54                                           | 1.05                                | 2.24                                 | 2.60E-02  | 3.30E-02                           |
| Muscle Relaxers                             | 2,986        | <11                                          | 1.10                                           | 0.55                                | 2.19                                 | 8.00E-01  | 8.20E-01                           |

eTable 7 continued

| Concurrent Exposure to 2 FADs                 |               |              |             |             |             |                  |                  |  |
|-----------------------------------------------|---------------|--------------|-------------|-------------|-------------|------------------|------------------|--|
| PPI & Thiazide Diuretics                      | 116,220       | 4.68         | 1.93        | 1.76        | 2.10        | 1.20E-48         | 8.70E-48         |  |
| SSRI/SNRI & Thiazide Diuretics                | 70,540        | 7.57         | 2.59        | 2.37        | 2.83        | 1.90E-98         | 2.30E-97         |  |
| PPI & SSRI/SNRI                               | 49,199        | 10.51        | 2.59        | 2.36        | 2.83        | 2.60E-95         | 3.10E-94         |  |
| PPI & Loop Diuretics                          | 34,016        | 12.85        | 2.67        | 2.42        | 2.94        | 2.80E-86         | 3.10E-85         |  |
| Thiazide Diuretics & Opioids                  | 32,651        | 12.07        | 4.45        | 4.02        | 4.92        | 6.00E-181        | 1.00E-179        |  |
| Anticonvulsants & Thiazide Diuretics          | 22,172        | 5.59         | 2.11        | 1.77        | 2.52        | 2.00E-16         | 6.20E-16         |  |
| <i>PPI &amp; Opioids</i>                      | <i>20,891</i> | <i>14.31</i> | <i>4.00</i> | <i>3.56</i> | <i>4.49</i> | <i>8.00E-121</i> | <i>1.00E-119</i> |  |
| Thiazide Diuretics & Loop Diuretics           | 20,555        | 11.48        | 3.42        | 3.00        | 3.90        | 2.30E-76         | 2.30E-75         |  |
| <i>SSRI/SNRI &amp; Loop Diuretics</i>         | <i>19,946</i> | <i>20.46</i> | <i>3.05</i> | <i>2.75</i> | <i>3.37</i> | <i>2.00E-103</i> | <i>3.00E-102</i> |  |
| Sedative Hypnotics & Thiazide Diuretics       | 18,496        | 6.33         | 2.44        | 2.03        | 2.92        | 1.40E-21         | 5.80E-21         |  |
| TZD & Thiazide Diuretics                      | 17,475        | 5.32         | 2.81        | 2.29        | 3.45        | 6.30E-23         | 2.90E-22         |  |
| H2RA & Thiazide Diuretics                     | 17,259        | 5.33         | 2.00        | 1.63        | 2.46        | 3.70E-11         | 8.30E-11         |  |
| CAAH & Thiazide Diuretics                     | 17,147        | 5.89         | 2.35        | 1.93        | 2.86        | 1.70E-17         | 5.60E-17         |  |
| <i>SSRI/SNRI &amp; Opioids</i>                | <i>14,980</i> | <i>17.29</i> | <i>3.91</i> | <i>3.46</i> | <i>4.43</i> | <i>3.00E-102</i> | <i>4.00E-101</i> |  |
| Inhaled Glucocorticoids & Thiazide Diuretics  | 14,174        | 5.43         | 2.18        | 1.74        | 2.73        | 1.00E-11         | 2.40E-11         |  |
| PPI & Anticonvulsants                         | 13,998        | 8.14         | 2.39        | 1.99        | 2.88        | 3.20E-20         | 1.20E-19         |  |
| SSRI/SNRI & Sedative Hypnotics                | 13,415        | 10.21        | 3.15        | 2.66        | 3.73        | 2.50E-40         | 1.70E-39         |  |
| <i>Opioids &amp; Loop Diuretics</i>           | <i>13,206</i> | <i>20.14</i> | <i>4.48</i> | <i>3.96</i> | <i>5.07</i> | <i>9.00E-126</i> | <i>1.00E-124</i> |  |
| Anticonvulsants & SSRI/SNRI                   | 12,976        | 9.71         | 2.41        | 2.02        | 2.88        | 1.60E-22         | 7.20E-22         |  |
| TCA & Thiazide Diuretics                      | 12,787        | 6.02         | 2.46        | 1.96        | 3.08        | 4.60E-15         | 1.30E-14         |  |
| <i>Nitrates &amp; Loop Diuretics</i>          | <i>12,579</i> | <i>17.57</i> | <i>3.25</i> | <i>2.84</i> | <i>3.72</i> | <i>1.90E-65</i>  | <i>1.60E-64</i>  |  |
| Thiazide Diuretics & Nitrates                 | 12,383        | 8.96         | 2.51        | 2.08        | 3.02        | 1.00E-21         | 4.30E-21         |  |
| SSRI/SNRI & SGAP                              | 12,179        | 25.54        | 2.96        | 2.64        | 3.32        | 1.00E-76         | 1.00E-75         |  |
| PPI & Sedative Hypnotics                      | 11,389        | 8.43         | 2.71        | 2.22        | 3.32        | 3.00E-22         | 1.30E-21         |  |
| Oral Glucocorticoids & Thiazide Diuretics     | 11,212        | 7.31         | 2.59        | 2.08        | 3.22        | 1.20E-17         | 4.00E-17         |  |
| Anticonvulsants & Opioids                     | 9,695         | 12.58        | 3.79        | 3.17        | 4.54        | 4.40E-48         | 3.10E-47         |  |
| PPI & Nitrates                                | 8,589         | 9.90         | 2.02        | 1.63        | 2.50        | 1.50E-10         | 3.30E-10         |  |
| Anticonvulsants & Loop Diuretics              | 8,566         | 13.42        | 2.88        | 2.39        | 3.47        | 4.00E-29         | 2.30E-28         |  |
| Inhaled Glucocorticoids & PPI                 | 8,525         | 6.22         | 2.10        | 1.60        | 2.75        | 8.10E-08         | 1.50E-07         |  |
| Benzodiazepine & Thiazide Diuretics           | 8,214         | 7.79         | 3.03        | 2.37        | 3.88        | 1.20E-18         | 4.20E-18         |  |
| Oral Glucocorticoids & PPI                    | 7,847         | 10.20        | 2.73        | 2.19        | 3.41        | 4.30E-19         | 1.60E-18         |  |
| <i>SSRI/SNRI &amp; Benzodiazepine</i>         | <i>7,752</i>  | <i>15.87</i> | <i>4.50</i> | <i>3.76</i> | <i>5.38</i> | <i>6.40E-61</i>  | <i>5.10E-60</i>  |  |
| PPI & TCA                                     | 7,680         | 5.08         | 1.84        | 1.35        | 2.53        | 1.40E-04         | 2.10E-04         |  |
| H2RA & Loop Diuretics                         | 6,880         | 13.81        | 2.73        | 2.23        | 3.34        | 3.10E-22         | 1.30E-21         |  |
| H2RA & SSRI/SNRI                              | 6,279         | 12.10        | 2.19        | 1.74        | 2.74        | 1.20E-11         | 2.80E-11         |  |
| Antiparkinson Agents & Thiazide Diuretics     | 6,278         | 8.28         | 2.78        | 2.11        | 3.65        | 2.40E-13         | 5.90E-13         |  |
| CAAH & Loop Diuretics                         | 6,147         | 6.34         | 1.82        | 1.33        | 2.49        | 2.10E-04         | 3.20E-04         |  |
| PPI & H2RA                                    | 6,039         | 6.79         | 2.23        | 1.64        | 3.03        | 3.00E-07         | 5.60E-07         |  |
| <i>Sedative Hypnotics &amp; Opioids</i>       | <i>5,905</i>  | <i>15.41</i> | <i>4.90</i> | <i>3.98</i> | <i>6.02</i> | <i>3.50E-51</i>  | <i>2.70E-50</i>  |  |
| PPI & Benzodiazepine                          | 5,691         | 9.14         | 2.97        | 2.26        | 3.91        | 5.40E-15         | 1.50E-14         |  |
| SSRI/SNRI & Antiparkinson Agents              | 5,266         | 16.90        | 3.57        | 2.89        | 4.41        | 3.10E-32         | 2.00E-31         |  |
| Inhaled Glucocorticoids & Loop Diuretics      | 5,204         | 11.72        | 2.47        | 1.92        | 3.18        | 2.30E-12         | 5.60E-12         |  |
| Inhaled Glucocorticoids & SSRI/SNRI           | 4,871         | 13.34        | 3.29        | 2.58        | 4.21        | 1.30E-21         | 5.40E-21         |  |
| SSRI/SNRI & TCA                               | 4,519         | 9.74         | 3.16        | 2.35        | 4.25        | 2.70E-14         | 7.20E-14         |  |
| Oral Glucocorticoids & SSRI/SNRI              | 4,482         | 16.29        | 3.67        | 2.92        | 4.63        | 2.50E-28         | 1.40E-27         |  |
| TZD & Loop Diuretics                          | 4,463         | 9.63         | 3.48        | 2.58        | 4.70        | 4.00E-16         | 1.20E-15         |  |
| Oral Glucocorticoids & Loop Diuretics         | 4,323         | 12.49        | 2.45        | 1.87        | 3.20        | 5.80E-11         | 1.30E-10         |  |
| PPI & TZD                                     | 4,212         | 9.26         | 3.91        | 2.86        | 5.36        | 2.20E-17         | 7.20E-17         |  |
| Sedative Hypnotics & Loop Diuretics           | 4,177         | 16.04        | 3.36        | 2.64        | 4.28        | 6.30E-23         | 2.90E-22         |  |
| H1 Blockers & Thiazide Diuretics              | 4,138         | 7.49         | 2.49        | 1.75        | 3.54        | 4.20E-07         | 7.70E-07         |  |
| SSRI/SNRI & Nitrates                          | 4,029         | 16.38        | 2.50        | 1.96        | 3.19        | 1.50E-13         | 3.80E-13         |  |
| PPI & Antiparkinson Agents                    | 3,797         | 14.49        | 3.44        | 2.63        | 4.48        | 1.10E-19         | 4.10E-19         |  |
| PPI & CAAH                                    | 3,721         | 6.45         | 1.88        | 1.26        | 2.81        | 2.00E-03         | 2.80E-03         |  |
| Oral Glucocorticoids & Opioids                | 3,581         | 16.20        | 4.46        | 3.44        | 5.77        | 1.10E-29         | 6.60E-29         |  |
| PPI & SGAP                                    | 3,504         | 29.97        | 2.94        | 2.42        | 3.57        | 9.80E-28         | 5.20E-27         |  |
| H2RA & Opioids                                | 3,404         | 14.98        | 3.69        | 2.80        | 4.86        | 1.70E-20         | 6.70E-20         |  |
| Thiazide Diuretics & SGAP                     | 3,352         | 22.97        | 3.65        | 2.92        | 4.58        | 1.60E-29         | 9.40E-29         |  |
| TCA & Loop Diuretics                          | 3,224         | 8.69         | 2.29        | 1.58        | 3.32        | 1.20E-05         | 2.10E-05         |  |
| Benzodiazepine & Opioids                      | 3,139         | 15.61        | 4.50        | 3.40        | 5.96        | 1.10E-25         | 5.70E-25         |  |
| TCA & Opioids                                 | 3,118         | 14.75        | 5.05        | 3.78        | 6.75        | 6.90E-28         | 3.70E-27         |  |
| SGAP & Loop Diuretics                         | 2,999         | 24.01        | 2.22        | 1.76        | 2.81        | 1.80E-11         | 4.20E-11         |  |
| TZD & SSRI/SNRI                               | 2,934         | 11.93        | 3.84        | 2.75        | 5.35        | 2.30E-15         | 6.60E-15         |  |
| Anticonvulsants & Sedative Hypnotics          | 2,831         | 9.19         | 2.98        | 2.03        | 4.39        | 2.60E-08         | 5.10E-08         |  |
| PPI & H1 Blockers                             | 2,655         | 13.18        | 3.53        | 2.53        | 4.92        | 9.80E-14         | 2.60E-13         |  |
| Anticonvulsants & TCA                         | 2,548         | 5.50         | 1.84        | 1.09        | 3.11        | 2.20E-02         | 2.80E-02         |  |
| SSRI/SNRI & CAAH                              | 2,469         | 10.13        | 2.33        | 1.57        | 3.45        | 2.50E-05         | 4.30E-05         |  |
| Nitrates & Opioids                            | 2,383         | 18.04        | 4.02        | 2.98        | 5.43        | 1.10E-19         | 4.10E-19         |  |
| Antiparkinson Agents & Loop Diuretics         | 2,369         | 16.04        | 2.96        | 2.15        | 4.08        | 2.80E-11         | 6.40E-11         |  |
| H2RA & Anticonvulsants                        | 2,279         | 8.78         | 1.93        | 1.25        | 3.00        | 3.30E-03         | 4.60E-03         |  |
| Benzodiazepine & Loop Diuretics               | 2,172         | 21.18        | 4.61        | 3.45        | 6.17        | 6.00E-25         | 3.00E-24         |  |
| Anticonvulsants & SGAP                        | 2,134         | 16.40        | 2.27        | 1.62        | 3.16        | 1.50E-06         | 2.60E-06         |  |
| Inhaled Glucocorticoids & Oral Glucocorticoid | 2,091         | 11.48        | 3.33        | 2.23        | 4.97        | 4.10E-09         | 8.30E-09         |  |

eTable 7 continued

|                                              |       |       |      |      |       |          |          |
|----------------------------------------------|-------|-------|------|------|-------|----------|----------|
| H2RA & Nitrates                              | 1,950 | 11.79 | 2.30 | 1.52 | 3.46  | 7.10E-05 | 1.10E-04 |
| Antiparkinson Agents & Opioids               | 1,949 | 18.47 | 4.90 | 3.53 | 6.80  | 2.10E-21 | 8.50E-21 |
| Antiparkinson Agents & SGAP                  | 1,909 | 17.81 | 2.97 | 2.12 | 4.17  | 2.90E-10 | 6.20E-10 |
| Inhaled Glucocorticoids & Opioids            | 1,894 | 10.03 | 3.02 | 1.92 | 4.74  | 1.50E-06 | 2.60E-06 |
| Anticonvulsants & Antiparkinson Agents       | 1,874 | 16.55 | 4.04 | 2.84 | 5.75  | 1.00E-14 | 2.70E-14 |
| CAAH & Opioids                               | 1,865 | 11.26 | 3.67 | 2.39 | 5.64  | 2.60E-09 | 5.40E-09 |
| TCA & Sedative Hypnotics                     | 1,767 | <11   | 1.74 | 0.87 | 3.49  | 1.20E-01 | 1.40E-01 |
| Oral Glucocorticoids & Anticonvulsants       | 1,599 | 20.01 | 5.75 | 4.06 | 8.14  | 6.20E-23 | 2.90E-22 |
| Benzodiazepine & Sedative Hypnotics          | 1,532 | 8.49  | 3.14 | 1.82 | 5.42  | 3.70E-05 | 6.10E-05 |
| Oral Glucocorticoids & Sedative Hypnotics    | 1,515 | <11   | 2.09 | 1.13 | 3.89  | 2.00E-02 | 2.60E-02 |
| Anticonvulsants & Nitrates                   | 1,480 | 9.46  | 1.93 | 1.14 | 3.27  | 1.40E-02 | 1.80E-02 |
| H2RA & Sedative Hypnotics                    | 1,458 | <11   | 1.98 | 1.07 | 3.69  | 3.00E-02 | 3.80E-02 |
| Anticonvulsants & Benzodiazepine             | 1,407 | 10.66 | 3.09 | 1.86 | 5.13  | 1.30E-05 | 2.20E-05 |
| TZD & Opioids                                | 1,395 | 15.05 | 6.23 | 4.06 | 9.56  | 6.10E-17 | 1.90E-16 |
| H1 Blockers & Loop Diuretics                 | 1,327 | 17.33 | 3.59 | 2.38 | 5.41  | 9.50E-10 | 2.00E-09 |
| TZD & Anticonvulsants                        | 1,282 | 8.58  | 4.21 | 2.33 | 7.60  | 1.90E-06 | 3.30E-06 |
| Muscle Relaxers & Opioids                    | 1,271 | 14.16 | 6.50 | 4.09 | 10.32 | 2.20E-15 | 6.40E-15 |
| Oral Glucocorticoids & H2RA                  | 1,243 | 11.26 | 2.90 | 1.72 | 4.90  | 7.00E-05 | 1.10E-04 |
| Inhaled Glucocorticoids & Sedative Hypnotics | 1,242 | <11   | 1.28 | 0.53 | 3.08  | 5.80E-01 | 6.20E-01 |
| SSRI/SNRI & H1 Blockers                      | 1,241 | 22.56 | 4.64 | 3.20 | 6.73  | 5.40E-16 | 1.60E-15 |
| Inhaled Glucocorticoids & Anticonvulsants    | 1,220 | <11   | 1.32 | 0.59 | 2.94  | 5.00E-01 | 5.40E-01 |
| Opioids & SGAP                               | 1,219 | 32.00 | 3.60 | 2.63 | 4.94  | 1.60E-15 | 4.70E-15 |
| H2RA & TCA                                   | 1,210 | <11   | 1.93 | 0.92 | 4.05  | 8.30E-02 | 1.00E-01 |
| Inhaled Glucocorticoids & H2RA               | 1,184 | <11   | 2.81 | 1.51 | 5.22  | 1.10E-03 | 1.60E-03 |
| Anticonvulsants & CAAH                       | 1,183 | <11   | 2.12 | 1.06 | 4.24  | 3.40E-02 | 4.30E-02 |
| H2RA & SGAP                                  | 1,140 | 23.69 | 2.21 | 1.52 | 3.23  | 3.90E-05 | 6.40E-05 |
| H1 Blockers & Opioids                        | 1,139 | 21.07 | 5.76 | 3.86 | 8.61  | 1.10E-17 | 3.70E-17 |
| Sedative Hypnotics & SGAP                    | 1,030 | 28.15 | 4.17 | 2.89 | 6.00  | 1.80E-14 | 4.90E-14 |
| TCA & Benzodiazepines                        | 1,006 | <11   | 3.36 | 1.75 | 6.46  | 2.80E-04 | 4.20E-04 |
| Sedative Hypnotics & Nitrates                | 1,002 | 11.98 | 2.55 | 1.45 | 4.49  | 1.20E-03 | 1.70E-03 |
| Barbiturates & Thiazide Diuretics            | 967   | <11   | 2.65 | 1.33 | 5.31  | 5.80E-03 | 8.00E-03 |
| Sedative Hypnotics & Antiparkinson Agents    | 844   | <11   | 3.60 | 1.93 | 6.69  | 5.30E-05 | 8.60E-05 |
| Muscle Relaxers & Thiazide Diuretics         | 844   | <11   | 2.22 | 0.83 | 5.91  | 1.10E-01 | 1.30E-01 |
| Oral Glucocorticoids & TCA                   | 808   | <11   | 1.93 | 0.80 | 4.63  | 1.40E-01 | 1.60E-01 |
| SSRI/SNRI & Barbiturates                     | 799   | <11   | 1.57 | 0.71 | 3.51  | 2.70E-01 | 3.10E-01 |
| Thiazide Diuretics & FGAP                    | 797   | <11   | 2.98 | 1.49 | 5.97  | 2.00E-03 | 2.80E-03 |
| CAAH & Nitrates                              | 778   | <11   | 1.97 | 0.94 | 4.13  | 7.40E-02 | 9.00E-02 |
| Inhaled Glucocorticoids & Nitrates           | 775   | <11   | 1.68 | 0.76 | 3.75  | 2.00E-01 | 2.30E-01 |
| Antiparkinson Agents & FGAP                  | 768   | 19.53 | 5.44 | 3.27 | 9.03  | 6.00E-11 | 1.30E-10 |
| TZD & Nitrates                               | 766   | <11   | 4.04 | 2.10 | 7.77  | 2.80E-05 | 4.70E-05 |
| H2RA & Benzodiazepine                        | 762   | <11   | 3.24 | 1.68 | 6.22  | 4.30E-04 | 6.40E-04 |
| H2RA & TZD                                   | 755   | <11   | 1.87 | 0.60 | 5.81  | 2.80E-01 | 3.10E-01 |
| H2RA & CAAH                                  | 748   | <11   | 1.40 | 0.53 | 3.73  | 5.00E-01 | 5.40E-01 |
| Sedative Hypnotics & CAAH                    | 696   | <11   | 2.65 | 1.19 | 5.91  | 1.70E-02 | 2.20E-02 |
| Anticonvulsants & Barbiturates               | 692   | 23.13 | 7.38 | 4.52 | 12.07 | 1.50E-15 | 4.50E-15 |
| Oral Glucocorticoids & Benzodiazepine        | 681   | 19.09 | 5.43 | 3.15 | 9.35  | 1.10E-09 | 2.30E-09 |
| TZD & Sedative Hypnotics                     | 675   | <11   | 4.55 | 2.17 | 9.54  | 6.20E-05 | 9.80E-05 |
| SSRI/SNRI & FGAP                             | 675   | 22.22 | 3.49 | 2.10 | 5.80  | 1.30E-06 | 2.30E-06 |
| Inhaled Glucocorticoids & TCA                | 668   | <11   | 2.50 | 1.04 | 6.01  | 4.10E-02 | 5.20E-02 |
| Inhaled Glucocorticoids & Benzodiazepine     | 665   | <11   | 3.91 | 1.96 | 7.83  | 1.20E-04 | 1.80E-04 |
| Benzodiazepine & SGAP                        | 661   | 49.95 | 6.91 | 4.91 | 9.74  | 2.00E-28 | 1.10E-27 |
| TZD & TCA                                    | 655   | <11   | 1.45 | 0.36 | 5.82  | 6.00E-01 | 6.40E-01 |
| Oral Glucocorticoids & Nitrates              | 653   | <11   | 2.10 | 1.00 | 4.40  | 5.00E-02 | 6.30E-02 |
| TCA & Antiparkinson Agents                   | 618   | <11   | 2.99 | 1.34 | 6.66  | 7.40E-03 | 1.00E-02 |
| TCA & Nitrates                               | 615   | <11   | 1.83 | 0.76 | 4.39  | 1.80E-01 | 2.10E-01 |
| PPI & Barbiturates                           | 602   | <11   | 2.85 | 1.28 | 6.35  | 1.00E-02 | 1.30E-02 |
| PPI & Muscle Relaxers                        | 591   | <11   | 2.02 | 0.65 | 6.25  | 2.20E-01 | 2.50E-01 |
| H2RA & Antiparkinson Agents                  | 581   | <11   | 1.93 | 0.87 | 4.29  | 1.10E-01 | 1.30E-01 |
| H2RA & H1 Blockers                           | 551   | <11   | 2.59 | 1.17 | 5.78  | 2.00E-02 | 2.60E-02 |
| PPI & FGAP                                   | 542   | <11   | 1.82 | 0.87 | 3.82  | 1.10E-01 | 1.30E-01 |
| Sedative Hypnotics & H1 Blockers             | 528   | <11   | 1.45 | 0.47 | 4.51  | 5.20E-01 | 5.60E-01 |
| Anticonvulsants & H1 Blockers                | 524   | <11   | 4.37 | 2.18 | 8.74  | 3.10E-05 | 5.20E-05 |
| TCA & SGAP                                   | 518   | <11   | 1.03 | 0.33 | 3.19  | 9.60E-01 | 9.60E-01 |
| Benzodiazepine & Antiparkinson Agents        | 496   | <11   | 5.23 | 2.72 | 10.06 | 7.20E-07 | 1.30E-06 |
| Nitrates & SGAP                              | 492   | <11   | 1.69 | 0.88 | 3.25  | 1.20E-01 | 1.40E-01 |
| Oral Glucocorticoids & Antiparkinson Agents  | 486   | <11   | 3.41 | 1.62 | 7.15  | 1.20E-03 | 1.70E-03 |

eTable 7 continued

|                                                        |            |               |              |             |              |                 |                 |
|--------------------------------------------------------|------------|---------------|--------------|-------------|--------------|-----------------|-----------------|
| <b>TCA &amp; CAAH</b>                                  | <b>480</b> | <b>&lt;11</b> | <b>3.23</b>  | <b>1.35</b> | <b>7.77</b>  | <b>8.70E-03</b> | <b>1.20E-02</b> |
| Benzodiazepine & Nitrates                              | 467        | <11           | 2.14         | 0.89        | 5.15         | 8.90E-02        | 1.10E-01        |
| <b>TZD &amp; CAAH</b>                                  | <b>462</b> | <b>&lt;11</b> | <b>3.83</b>  | <b>1.44</b> | <b>10.20</b> | <b>7.30E-03</b> | <b>1.00E-02</b> |
| Oral Glucocorticoids & CAAH                            | 441        | <11           | 1.10         | 0.28        | 4.39         | 8.90E-01        | 9.00E-01        |
| <b>FGAP &amp; SGAP</b>                                 | <b>440</b> | <b>24.97</b>  | <b>4.80</b>  | <b>2.65</b> | <b>8.67</b>  | <b>2.10E-07</b> | <b>3.90E-07</b> |
| <b>Benzodiazepine &amp; CAAH</b>                       | <b>426</b> | <b>&lt;11</b> | <b>3.92</b>  | <b>1.76</b> | <b>8.72</b>  | <b>8.40E-04</b> | <b>1.20E-03</b> |
| <b>Inhaled Glucocorticoids &amp; TZD</b>               | <b>424</b> | <b>&lt;11</b> | <b>4.40</b>  | <b>1.65</b> | <b>11.72</b> | <b>3.10E-03</b> | <b>4.40E-03</b> |
| Antiparkinson Agents & Nitrates                        | 406        | <11           | 0.92         | 0.23        | 3.67         | 9.00E-01        | 9.00E-01        |
| <b>Inhaled Glucocorticoids &amp; Antiparkinson Age</b> | <b>384</b> | <b>&lt;11</b> | <b>4.47</b>  | <b>2.01</b> | <b>9.96</b>  | <b>2.50E-04</b> | <b>3.80E-04</b> |
| <b>Barbiturates &amp; Loop Diuretics</b>               | <b>381</b> | <b>&lt;11</b> | <b>4.86</b>  | <b>2.61</b> | <b>9.03</b>  | <b>6.00E-07</b> | <b>1.10E-06</b> |
| SSRISNRI & Muscle Relaxers                             | 366        | <11           | 2.89         | 0.93        | 8.95         | 6.60E-02        | 8.10E-02        |
| TZD & SGAP                                             | 366        | <11           | 1.81         | 0.58        | 5.62         | 3.00E-01        | 3.30E-01        |
| H1 Blockers & Nitrates                                 | 360        | <11           | 2.11         | 0.79        | 5.62         | 1.40E-01        | 1.60E-01        |
| <b>FGAP &amp; Loop Diuretics</b>                       | <b>357</b> | <b>33.61</b>  | <b>5.27</b>  | <b>2.99</b> | <b>9.29</b>  | <b>8.80E-09</b> | <b>1.80E-08</b> |
| Inhaled Glucocorticoids & SGAP                         | 354        | <11           | 1.36         | 0.51        | 3.62         | 5.40E-01        | 5.80E-01        |
| Inhaled Glucocorticoids & CAAH                         | 339        | <11           | 0.00         | 0.00        | 0.00         | 7.50E-01        | 7.80E-01        |
| <b>TCA &amp; FGAP</b>                                  | <b>322</b> | <b>&lt;11</b> | <b>6.14</b>  | <b>2.76</b> | <b>13.68</b> | <b>8.80E-06</b> | <b>1.50E-05</b> |
| CAAH & SGAP                                            | 287        | <11           | 0.39         | 0.06        | 2.79         | 3.50E-01        | 3.90E-01        |
| <b>Oral Glucocorticoids &amp; H1 Blockers</b>          | <b>277</b> | <b>&lt;11</b> | <b>7.94</b>  | <b>3.97</b> | <b>15.87</b> | <b>4.80E-09</b> | <b>9.60E-09</b> |
| <b>Antiparkinson Agents &amp; CAAH</b>                 | <b>273</b> | <b>&lt;11</b> | <b>5.13</b>  | <b>2.31</b> | <b>11.43</b> | <b>6.20E-05</b> | <b>9.80E-05</b> |
| <b>Oral Glucocorticoids &amp; SGAP</b>                 | <b>267</b> | <b>&lt;11</b> | <b>2.77</b>  | <b>1.32</b> | <b>5.82</b>  | <b>7.00E-03</b> | <b>9.60E-03</b> |
| TCA & H1 Blockers                                      | 267        | <11           | 2.10         | 0.52        | 8.39         | 3.00E-01        | 3.30E-01        |
| Oral Glucocorticoids & TZD                             | 260        | <11           | 1.48         | 0.21        | 10.51        | 7.00E-01        | 7.40E-01        |
| <b>Inhaled Glucocorticoids &amp; H1 Blockers</b>       | <b>252</b> | <b>&lt;11</b> | <b>8.34</b>  | <b>3.98</b> | <b>17.51</b> | <b>2.00E-08</b> | <b>4.00E-08</b> |
| <b>Benzodiazepine &amp; H1 Blockers</b>                | <b>249</b> | <b>&lt;11</b> | <b>4.25</b>  | <b>1.60</b> | <b>11.34</b> | <b>3.80E-03</b> | <b>5.30E-03</b> |
| TZD & Antiparkinson Agents                             | 249        | <11           | 1.45         | 0.20        | 10.28        | 7.10E-01        | 7.40E-01        |
| <b>Anticonvulsants &amp; FGAP</b>                      | <b>227</b> | <b>&lt;11</b> | <b>4.40</b>  | <b>1.83</b> | <b>10.57</b> | <b>9.40E-04</b> | <b>1.40E-03</b> |
| Muscle Relaxers & Loop Diuretics                       | 214        | <11           | 1.53         | 0.22        | 10.89        | 6.70E-01        | 7.10E-01        |
| Anticonvulsants & Muscle Relaxers                      | 212        | <11           | 3.80         | 0.95        | 15.18        | 5.90E-02        | 7.30E-02        |
| Sedative Hypnotics & Muscle Relaxers                   | 207        | <11           | 0.00         | 0.00        | 0.00         | 8.50E-01        | 8.70E-01        |
| <b>Opioids &amp; FGAP</b>                              | <b>202</b> | <b>&lt;11</b> | <b>6.18</b>  | <b>2.94</b> | <b>12.97</b> | <b>1.50E-06</b> | <b>2.60E-06</b> |
| <b>Barbiturates &amp; Opioids</b>                      | <b>198</b> | <b>&lt;11</b> | <b>8.16</b>  | <b>3.89</b> | <b>17.12</b> | <b>2.90E-08</b> | <b>5.60E-08</b> |
| TZD & H1 Blockers                                      | 197        | <11           | 3.77         | 0.94        | 15.06        | 6.10E-02        | 7.50E-02        |
| H1 Blockers & CAAH                                     | 196        | <11           | 2.89         | 0.72        | 11.54        | 1.30E-01        | 1.50E-01        |
| H2RA & FGAP                                            | 172        | <11           | 1.73         | 0.43        | 6.90         | 4.40E-01        | 4.80E-01        |
| H1 Blockers & SGAP                                     | 160        | <11           | 2.31         | 0.74        | 7.16         | 1.50E-01        | 1.70E-01        |
| <b>Barbiturates &amp; Antiparkinson Agents</b>         | <b>157</b> | <b>&lt;11</b> | <b>4.08</b>  | <b>1.31</b> | <b>12.65</b> | <b>1.50E-02</b> | <b>2.00E-02</b> |
| <b>Sedative Hypnotics &amp; FGAP</b>                   | <b>147</b> | <b>&lt;11</b> | <b>5.01</b>  | <b>1.88</b> | <b>13.36</b> | <b>1.30E-03</b> | <b>1.90E-03</b> |
| <b>H1 Blockers &amp; Antiparkinson Agents</b>          | <b>143</b> | <b>&lt;11</b> | <b>4.68</b>  | <b>1.51</b> | <b>14.52</b> | <b>7.50E-03</b> | <b>1.00E-02</b> |
| TCA & Muscle Relaxers                                  | 131        | <11           | 0.00         | 0.00        | 0.00         | 8.80E-01        | 8.90E-01        |
| <b>TZD &amp; Benzodiazepine</b>                        | <b>129</b> | <b>&lt;11</b> | <b>13.43</b> | <b>5.04</b> | <b>35.80</b> | <b>2.10E-07</b> | <b>3.90E-07</b> |
| Barbiturates & Sedative Hypnotics                      | 127        | <11           | 3.92         | 0.98        | 15.67        | 5.30E-02        | 6.60E-02        |
| Benzodiazepine & Barbiturates                          | 126        | <11           | 2.96         | 0.42        | 21.05        | 2.80E-01        | 3.10E-01        |
| <b>TCA &amp; Barbiturates</b>                          | <b>107</b> | <b>&lt;11</b> | <b>10.53</b> | <b>3.40</b> | <b>32.66</b> | <b>4.60E-05</b> | <b>7.50E-05</b> |
| Inhaled Glucocorticoids & Barbiturates                 | 105        | <11           | 0.00         | 0.00        | 0.00         | 8.70E-01        | 8.80E-01        |
| <b>FAD pairs with &lt;100PY</b>                        | -          | -             | <b>2.67</b>  | <b>1.66</b> | <b>4.29</b>  | <b>5.40E-05</b> | <b>8.70E-05</b> |
| <b>3+FAD</b>                                           | -          | -             | <b>4.58</b>  | <b>4.43</b> | <b>4.73</b>  | <b>0.00E+00</b> | <b>0.00E+00</b> |
| <b>0 Non-FAD</b>                                       | -          | -             |              |             |              |                 |                 |
| <b>1 Non-FAD</b>                                       | -          | -             | <b>0.94</b>  | <b>0.91</b> | <b>0.97</b>  | <b>1.20E-04</b> | <b>1.80E-04</b> |
| <b>2 Non-FAD</b>                                       | -          | -             | <b>0.84</b>  | <b>0.82</b> | <b>0.87</b>  | <b>1.20E-23</b> | <b>5.80E-23</b> |
| <b>3+ Non-FAD</b>                                      | -          | -             | <b>0.75</b>  | <b>0.72</b> | <b>0.77</b>  | <b>4.80E-80</b> | <b>5.20E-79</b> |

Exposure indicator variables for fracture associated drug (FAD) use reflect person days with any of 21 individual FADs and 210 possible two-way combination of these drugs (included as a specific exposure in most cases, but aggregated to "FAD pairs with <100 PY" if cohort specific observation < 100 person years). "3+FAD" is an indicator variable for person days with three-or-more FADs. The reference exposure was zero FADs. Non-FADs are 552 drug ingredients that are not FADs aggregated into status of receipt of any 1 non-FAD exposure (1 Non-FAD), 2 concurrent non-FAD exposures (2 Non-FAD) or 3+ Non-FAD exposure classified for each person, for each day of observation. Medicaid eligibility and Medicare Part D low income subsidy are two poverty indicators. Long-term care is defined as 50% or more of annual prescriptions dispensed by a long-term care pharmacy. The three categories of drugs protective of fracture are: 1. osteoporosis treatments: oral and injected bisphosphonates, calcitonin, denosumab, parathyroid hormone, 2. Estrogens- systemic estrogens, selective estrogen receptor modulators, and 3. beta-blockers. SSRI/SNRI = combined drug group of selective serotonin reuptake inhibitors and selective norepinephrine reuptake inhibitors. PPI= proton pump inhibitors, FGAP = first generation antipsychotic. SGAP = second generation antipsychotic. TCA= tricyclic antidepressants. H2RA is Histamine-2 Receptor Antagonists. TZD = Thiazolidinediones. H1 Blockers = 1st Generation Antihistamines. CAAH = Central Acting Antihypertensives. Sedative Hypnotics include only non-benzodiazepine drugs. The Tobacco/Chronic Obstructive Lung Disease is an aggregate indicator of these diagnoses. Bold if False Discovery Rate corrected P value < 0.05. Italicized if population-level impact criteria were met.



eTable 8. Cox Proportional Hazard Model Output: Hip Fracture Risk Associated With Fracture-Associated Drugs Among Men

In 20% Medicare sample, person-years of exposure and crude fracture rate per exposure group, adjusted for sociodemographic factors, comorbidities, non-fracture-associated drug use (person-years, 4 160 502).

|                                             |              |                                        | Cox Regression Model (Hip Fracture n = 12,317) |                               |                                |           |                              |
|---------------------------------------------|--------------|----------------------------------------|------------------------------------------------|-------------------------------|--------------------------------|-----------|------------------------------|
| Parameter                                   | Person Years | Fracture Rate (# Fracture per 1000 PY) | Hazard Ratio (HR)                              | Lower 95% Confidence Interval | Higher 95% Confidence Interval | p-value   | False Discovery Rate p-value |
| <b>Age (reference 67-69)</b>                |              |                                        |                                                |                               |                                |           |                              |
| Age 70-74                                   | -            | -                                      | 1.19                                           | 1.12                          | 1.27                           | 9.60E-08  | 3.00E-07                     |
| Age 75-79                                   | -            | -                                      | 1.84                                           | 1.72                          | 1.96                           | 1.10E-77  | 2.50E-76                     |
| Age 80-84                                   | -            | -                                      | 2.98                                           | 2.80                          | 3.18                           | 1.00E-248 | 4.00E-247                    |
| Age 85+                                     | -            | -                                      | 5.29                                           | 4.96                          | 5.64                           | 0.00E+00  | 0.00E+00                     |
| <b>Race/Ethnicity (reference white)</b>     |              |                                        |                                                |                               |                                |           |                              |
| Black                                       | -            | -                                      | 0.56                                           | 0.51                          | 0.61                           | 6.20E-38  | 7.90E-37                     |
| Hispanic                                    | -            | -                                      | 0.71                                           | 0.65                          | 0.77                           | 5.40E-16  | 3.30E-15                     |
| Asian                                       | -            | -                                      | 0.52                                           | 0.45                          | 0.59                           | 1.80E-23  | 1.20E-22                     |
| Other                                       | -            | -                                      | 0.92                                           | 0.77                          | 1.08                           | 3.00E-01  | 3.70E-01                     |
| <b>Low Income Subsidy</b>                   |              |                                        |                                                |                               |                                |           |                              |
| Original Medicare eligibility (%)           | -            | -                                      | 1.18                                           | 1.08                          | 1.28                           | 1.20E-04  | 2.60E-04                     |
| Disability                                  | -            | -                                      | 1.03                                           | 0.33                          | 3.18                           | 9.70E-01  | 9.70E-01                     |
| Aged                                        | -            | -                                      | 0.87                                           | 0.28                          | 2.71                           | 8.10E-01  | 9.00E-01                     |
| <b>Long term care</b>                       |              |                                        |                                                |                               |                                |           |                              |
| Dual eligible                               | -            | -                                      | 1.43                                           | 1.36                          | 1.51                           | 9.90E-43  | 1.50E-41                     |
| <b>Chronic Conditions</b>                   |              |                                        |                                                |                               |                                |           |                              |
| Osteoporosis/Osteopenia                     | -            | -                                      | 4.44                                           | 4.12                          | 4.78                           | 0.00E+00  | 0.00E+00                     |
| Dementia                                    | -            | -                                      | 3.74                                           | 3.55                          | 3.94                           | 0.00E+00  | 0.00E+00                     |
| Obesity                                     | -            | -                                      | 0.94                                           | 0.87                          | 1.02                           | 1.20E-01  | 1.60E-01                     |
| Depression                                  | -            | -                                      | 1.23                                           | 1.16                          | 1.31                           | 3.60E-12  | 1.60E-11                     |
| Serious Mental Illness                      | -            | -                                      | 1.34                                           | 1.23                          | 1.45                           | 8.50E-13  | 4.10E-12                     |
| Alcohol Abuse                               | -            | -                                      | 1.69                                           | 1.48                          | 1.93                           | 2.40E-14  | 1.30E-13                     |
| Tobacco/Chronic Lung Disease                | -            | -                                      | 2.52                                           | 2.41                          | 2.63                           | 0.00E+00  | 0.00E+00                     |
| Diabetes                                    | -            | -                                      | 0.87                                           | 0.83                          | 0.90                           | 6.60E-13  | 3.30E-12                     |
| Liver Disease                               | -            | -                                      | 1.07                                           | 0.96                          | 1.19                           | 2.10E-01  | 2.70E-01                     |
| Pancreatic Disease                          | -            | -                                      | 0.88                                           | 0.80                          | 0.96                           | 4.80E-03  | 8.10E-03                     |
| Inflammatory Bowel Disease                  | -            | -                                      | 0.99                                           | 0.87                          | 1.12                           | 8.50E-01  | 9.30E-01                     |
| Rheumatologic Disease                       | -            | -                                      | 0.98                                           | 0.93                          | 1.04                           | 5.70E-01  | 6.50E-01                     |
| Spinal Cord Disease or Injury               | -            | -                                      | 1.09                                           | 1.00                          | 1.19                           | 4.40E-02  | 6.10E-02                     |
| Serious Neurologic Disease                  | -            | -                                      | 1.01                                           | 0.97                          | 1.06                           | 6.20E-01  | 6.90E-01                     |
| Parkinson's/Huntington's Disease            | -            | -                                      | 1.09                                           | 1.01                          | 1.16                           | 1.80E-02  | 2.70E-02                     |
| Seizure Disorder                            | -            | -                                      | 0.90                                           | 0.85                          | 0.96                           | 1.70E-03  | 3.10E-03                     |
| Congestive Heart Failure                    | -            | -                                      | 1.06                                           | 1.02                          | 1.11                           | 4.60E-03  | 7.80E-03                     |
| Coronary Artery Disease                     | -            | -                                      | 0.91                                           | 0.87                          | 0.95                           | 4.40E-06  | 1.10E-05                     |
| Cerebrovascular Disease                     | -            | -                                      | 1.03                                           | 0.99                          | 1.08                           | 1.80E-01  | 2.30E-01                     |
| Peripheral Vascular Disease                 | -            | -                                      | 1.01                                           | 0.97                          | 1.05                           | 5.90E-01  | 6.70E-01                     |
| Traumatic Brain Injury                      | -            | -                                      | 1.29                                           | 1.19                          | 1.39                           | 1.10E-10  | 4.30E-10                     |
| Amputee                                     | -            | -                                      | 1.36                                           | 1.19                          | 1.55                           | 6.40E-06  | 1.60E-05                     |
| Estrogen                                    | -            | -                                      | 0.52                                           | 0.22                          | 1.25                           | 1.40E-01  | 1.80E-01                     |
| <b>Osteoporosis medications</b>             |              |                                        |                                                |                               |                                |           |                              |
| Beta Blockers                               | -            | -                                      | 0.86                                           | 0.75                          | 0.97                           | 1.60E-02  | 2.50E-02                     |
| <b>Single FAD Exposures</b>                 |              |                                        |                                                |                               |                                |           |                              |
| Thiazide Diuretics                          | 356,819      | 1.74                                   | 1.65                                           | 1.51                          | 1.81                           | 5.80E-28  | 4.70E-27                     |
| Proton Pump Inhibitors (PPI)                | 165,092      | 2.51                                   | 1.89                                           | 1.70                          | 2.09                           | 1.90E-32  | 2.20E-31                     |
| Loop Diuretics                              | 87,781       | 5.72                                   | 2.77                                           | 2.51                          | 3.06                           | 1.80E-88  | 5.20E-87                     |
| SSRI/SNRI                                   | 61,141       | 5.74                                   | 2.96                                           | 2.64                          | 3.32                           | 2.30E-78  | 5.90E-77                     |
| Opioids                                     | 47,153       | 5.41                                   | 3.83                                           | 3.36                          | 4.36                           | 3.90E-91  | 1.30E-89                     |
| Anticonvulsants                             | 38,090       | 4.17                                   | 2.66                                           | 2.26                          | 3.13                           | 5.30E-32  | 5.80E-31                     |
| Thiazolidinediones (TZD)                    | 35,171       | 2.33                                   | 2.48                                           | 1.99                          | 3.10                           | 1.10E-15  | 6.50E-15                     |
| Nitrates                                    | 32,805       | 3.17                                   | 1.80                                           | 1.48                          | 2.19                           | 6.30E-09  | 2.10E-08                     |
| Sedative Hypnotics                          | 29,598       | 2.03                                   | 1.51                                           | 1.17                          | 1.95                           | 1.70E-03  | 3.10E-03                     |
| Inhaled Glucocorticoids                     | 28,431       | 2.64                                   | 1.92                                           | 1.52                          | 2.41                           | 3.20E-08  | 1.00E-07                     |
| Oral Glucocorticoids                        | 24,530       | 3.71                                   | 2.50                                           | 2.03                          | 3.09                           | 1.10E-17  | 6.80E-17                     |
| H2 Receptor Antagonists (H2RA)              | 24,328       | 2.84                                   | 1.84                                           | 1.44                          | 2.33                           | 6.80E-07  | 1.90E-06                     |
| Anti Parkinson's Agents                     | 18,174       | 8.58                                   | 4.23                                           | 3.57                          | 5.01                           | 1.30E-62  | 2.70E-61                     |
| Benzodiazepine                              | 11,556       | 2.25                                   | 1.62                                           | 1.10                          | 2.38                           | 1.50E-02  | 2.30E-02                     |
| Tricyclic Antidepressants (TCA)             | 9,848        | 2.03                                   | 1.55                                           | 1.00                          | 2.40                           | 5.20E-02  | 7.20E-02                     |
| Central Acting Antihypertensives (CAAH)     | 9,276        | 2.16                                   | 1.59                                           | 1.03                          | 2.48                           | 3.80E-02  | 5.40E-02                     |
| 2nd Generation Antipsychotics (SGAP)        | 9,002        | 11.55                                  | 2.53                                           | 2.07                          | 3.08                           | 6.80E-20  | 4.30E-19                     |
| 1st Generation Antihistamines (H1 Blockers) | 5,108        | 3.13                                   | 1.70                                           | 1.04                          | 2.77                           | 3.50E-02  | 5.00E-02                     |
| Barbiturates                                | 2,841        | <11                                    | 1.78                                           | 0.89                          | 3.56                           | 1.10E-01  | 1.50E-01                     |
| 1st Generation Antipsychotics (FGAP)        | 1,644        | 7.91                                   | 2.73                                           | 1.58                          | 4.71                           | 3.10E-04  | 6.40E-04                     |
| Muscle Relaxers                             | 1,591        | <11                                    | 1.65                                           | 0.53                          | 5.13                           | 3.80E-01  | 4.50E-01                     |

Appendix Table 8 Continued

|                                                |        |       |      |      |       |          |          |
|------------------------------------------------|--------|-------|------|------|-------|----------|----------|
| Concurrent Exposure to 2 FADs                  |        |       |      |      |       |          |          |
| PPI & Thiazide Diuretics                       | 50,082 | 1.88  | 1.77 | 1.44 | 2.18  | 6.20E-08 | 2.00E-07 |
| PPI & Loop Diuretics                           | 16,398 | 7.56  | 3.15 | 2.62 | 3.78  | 1.40E-34 | 1.70E-33 |
| SSRI/SNRI & Thiazide Diuretics                 | 15,502 | 3.48  | 2.51 | 1.92 | 3.29  | 2.60E-11 | 1.10E-10 |
| PPI & SSRI/SNRI                                | 14,657 | 8.73  | 3.94 | 3.29 | 4.72  | 2.00E-50 | 3.50E-49 |
| TZD & Thiazide Diuretics                       | 13,126 | 2.44  | 3.00 | 2.11 | 4.25  | 8.50E-10 | 3.00E-09 |
| Thiazide Diuretics & Opioids                   | 12,391 | 5.57  | 4.98 | 3.92 | 6.33  | 4.20E-39 | 5.70E-38 |
| Thiazide Diuretics & Loop Diuretics            | 10,358 | 6.47  | 4.18 | 3.28 | 5.34  | 1.80E-30 | 1.60E-29 |
| PPI & Opioids                                  | 9,930  | 7.25  | 4.97 | 3.92 | 6.29  | 1.60E-40 | 2.30E-39 |
| Anticonvulsants & Thiazide Diuretics           | 9,928  | 3.32  | 2.81 | 1.99 | 3.97  | 4.20E-09 | 1.40E-08 |
| Nitrates & Loop Diuretics                      | 8,944  | 7.94  | 3.45 | 2.71 | 4.37  | 3.30E-24 | 2.40E-23 |
| Thiazide Diuretics & Nitrates                  | 7,784  | 3.08  | 2.11 | 1.41 | 3.16  | 2.90E-04 | 6.10E-04 |
| H2RA & Thiazide Diuretics                      | 7,677  | 2.47  | 2.18 | 1.39 | 3.42  | 7.40E-04 | 1.50E-03 |
| PPI & Anticonvulsants                          | 7,433  | 5.38  | 2.94 | 2.15 | 4.02  | 1.70E-11 | 7.10E-11 |
| Sedative Hypnotics & Thiazide Diuretics        | 7,333  | 2.05  | 1.83 | 1.10 | 3.04  | 2.00E-02 | 3.00E-02 |
| PPI & Nitrates                                 | 7,229  | 3.60  | 1.87 | 1.27 | 2.76  | 1.50E-03 | 2.90E-03 |
| CAAH & Thiazide Diuretics                      | 7,042  | 2.13  | 2.07 | 1.25 | 3.44  | 5.00E-03 | 8.30E-03 |
| SSRI/SNRI & Loop Diuretics                     | 6,777  | 12.54 | 3.72 | 2.98 | 4.63  | 8.90E-32 | 9.20E-31 |
| Inhaled Glucocorticoids & Thiazide Diuretics   | 6,751  | 2.67  | 2.35 | 1.48 | 3.75  | 3.00E-04 | 6.20E-04 |
| PPI & Sedative Hypnotics                       | 6,112  | 3.76  | 2.84 | 1.88 | 4.28  | 6.70E-07 | 1.90E-06 |
| Opioids & Loop Diuretics                       | 5,652  | 13.80 | 6.93 | 5.52 | 8.70  | 2.70E-62 | 5.20E-61 |
| Inhaled Glucocorticoids & PPI                  | 5,557  | 3.96  | 2.72 | 1.79 | 4.14  | 3.10E-06 | 7.90E-06 |
| Anticonvulsants & Opioids                      | 5,262  | 8.17  | 5.43 | 4.01 | 7.35  | 6.80E-28 | 5.40E-27 |
| Oral Glucocorticoids & Thiazide Diuretics      | 5,060  | 2.37  | 1.92 | 1.09 | 3.39  | 2.40E-02 | 3.60E-02 |
| Anticonvulsants & Loop Diuretics               | 5,013  | 7.58  | 3.16 | 2.29 | 4.36  | 3.00E-12 | 1.30E-11 |
| Anticonvulsants & SSRI/SNRI                    | 4,717  | 7.00  | 3.00 | 2.12 | 4.23  | 4.90E-10 | 1.80E-09 |
| Oral Glucocorticoids & PPI                     | 4,543  | 6.38  | 3.81 | 2.64 | 5.50  | 9.50E-13 | 4.40E-12 |
| SSRI/SNRI & SGAP                               | 4,445  | 15.52 | 3.57 | 2.80 | 4.55  | 6.30E-25 | 4.70E-24 |
| SSRI/SNRI & Opioids                            | 4,443  | 13.28 | 6.26 | 4.83 | 8.12  | 1.90E-43 | 3.10E-42 |
| SSRI/SNRI & Sedative Hypnotics                 | 4,192  | 8.35  | 5.12 | 3.67 | 7.16  | 1.00E-21 | 6.70E-21 |
| PPI & TZD                                      | 4,077  | 2.94  | 3.04 | 1.72 | 5.36  | 1.30E-04 | 2.80E-04 |
| Antiparkinson Agents & Thiazide Diuretics      | 3,634  | 6.88  | 4.63 | 3.11 | 6.88  | 3.80E-14 | 2.00E-13 |
| TZD & Loop Diuretics                           | 3,589  | 6.41  | 5.11 | 3.38 | 7.71  | 8.80E-15 | 5.00E-14 |
| PPI & H2RA                                     | 3,446  | <11   | 1.86 | 0.93 | 3.71  | 8.10E-02 | 1.10E-01 |
| Sedative Hypnotics & Opioids                   | 3,347  | 5.97  | 4.39 | 2.82 | 6.81  | 4.80E-11 | 1.90E-10 |
| Inhaled Glucocorticoids & Loop Diuretics       | 3,311  | 7.25  | 3.22 | 2.15 | 4.81  | 1.40E-08 | 4.60E-08 |
| H2RA & Loop Diuretics                          | 3,268  | 6.43  | 2.86 | 1.86 | 4.40  | 1.70E-06 | 4.50E-06 |
| PPI & Antiparkinson Agents                     | 2,964  | 8.43  | 3.48 | 2.34 | 5.18  | 7.40E-10 | 2.60E-09 |
| SSRI/SNRI & Antiparkinson Agents               | 2,963  | 15.86 | 5.81 | 4.33 | 7.80  | 9.20E-32 | 9.20E-31 |
| Oral Glucocorticoids & Loop Diuretics          | 2,900  | 12.07 | 5.08 | 3.64 | 7.11  | 2.00E-21 | 1.30E-20 |
| TCA & Thiazide Diuretics                       | 2,882  | <11   | 1.52 | 0.63 | 3.66  | 3.50E-01 | 4.20E-01 |
| Benzodiazepine & Thiazide Diuretics            | 2,875  | 4.52  | 3.88 | 2.25 | 6.69  | 1.10E-06 | 2.90E-06 |
| PPI & Benzodiazepine                           | 2,634  | 4.56  | 3.17 | 1.80 | 5.59  | 6.90E-05 | 1.50E-04 |
| CAAH & Loop Diuretics                          | 2,560  | 5.86  | 3.90 | 2.35 | 6.49  | 1.50E-07 | 4.50E-07 |
| SSRI/SNRI & Benzodiazepine                     | 2,462  | 11.78 | 7.12 | 4.93 | 10.28 | 1.20E-25 | 9.20E-25 |
| Sedative Hypnotics & Loop Diuretics            | 2,346  | 10.66 | 4.56 | 3.07 | 6.77  | 5.20E-14 | 2.70E-13 |
| H2RA & SSRI/SNRI                               | 2,263  | 10.17 | 3.70 | 2.45 | 5.59  | 4.80E-10 | 1.80E-09 |
| PPI & TCA                                      | 2,143  | <11   | 1.38 | 0.52 | 3.69  | 5.20E-01 | 6.00E-01 |
| SSRI/SNRI & Nitrates                           | 2,045  | 10.76 | 3.89 | 2.56 | 5.93  | 2.50E-10 | 9.50E-10 |
| Oral Glucocorticoids & Opioids                 | 1,877  | 6.93  | 4.43 | 2.57 | 7.65  | 9.20E-08 | 2.90E-07 |
| Antiparkinson Agents & Loop Diuretics          | 1,798  | 21.14 | 6.67 | 4.82 | 9.23  | 2.70E-30 | 2.40E-29 |
| H2RA & Opioids                                 | 1,797  | 10.02 | 6.21 | 3.90 | 9.88  | 1.30E-14 | 7.30E-14 |
| PPI & SGAP                                     | 1,715  | 13.99 | 2.51 | 1.68 | 3.76  | 8.20E-06 | 2.00E-05 |
| Benzodiazepine & Opioids                       | 1,699  | 8.83  | 6.40 | 3.85 | 10.64 | 8.60E-13 | 4.10E-12 |
| TZD & SSRI/SNRI                                | 1,683  | 8.91  | 6.21 | 3.73 | 10.32 | 2.00E-12 | 9.20E-12 |
| Nitrates & Opioids                             | 1,679  | 8.93  | 5.00 | 3.01 | 8.32  | 5.50E-10 | 2.00E-09 |
| H2RA & Nitrates                                | 1,627  | <11   | 2.90 | 1.51 | 5.59  | 1.40E-03 | 2.70E-03 |
| Inhaled Glucocorticoids & Oral Glucocorticoids | 1,615  | <11   | 1.42 | 0.53 | 3.78  | 4.90E-01 | 5.70E-01 |
| Anticonvulsants & Sedative Hypnotics           | 1,524  | <11   | 1.36 | 0.44 | 4.21  | 6.00E-01 | 6.80E-01 |
| Inhaled Glucocorticoids & SSRI/SNRI            | 1,514  | 7.27  | 3.16 | 1.75 | 5.73  | 1.40E-04 | 3.00E-04 |
| Oral Glucocorticoids & SSRI/SNRI               | 1,408  | 9.94  | 3.91 | 2.31 | 6.62  | 3.80E-07 | 1.10E-06 |
| H2RA & Anticonvulsants                         | 1,399  | <11   | 2.82 | 1.46 | 5.44  | 1.90E-03 | 3.40E-03 |
| Antiparkinson Agents & SGAP                    | 1,367  | 15.36 | 3.43 | 2.23 | 5.29  | 2.40E-08 | 7.90E-08 |
| Anticonvulsants & SGAP                         | 1,343  | 11.17 | 2.54 | 1.52 | 4.23  | 3.50E-04 | 7.20E-04 |
| PPI & CAAH                                     | 1,341  | <11   | 2.98 | 1.34 | 6.65  | 7.50E-03 | 1.20E-02 |
| Anticonvulsants & Antiparkinson Agents         | 1,292  | 10.06 | 4.05 | 2.34 | 7.00  | 5.60E-07 | 1.60E-06 |
| TZD & Anticonvulsants                          | 1,231  | <11   | 4.11 | 1.71 | 9.88  | 1.60E-03 | 3.00E-03 |
| H1 Blockers & Thiazide Diuretics               | 1,228  | <11   | 1.76 | 0.57 | 5.45  | 3.30E-01 | 4.00E-01 |
| TZD & Opioids                                  | 1,202  | <11   | 4.21 | 1.75 | 10.14 | 1.30E-03 | 2.50E-03 |
| Anticonvulsants & Nitrates                     | 1,198  | <11   | 1.61 | 0.60 | 4.30  | 3.40E-01 | 4.10E-01 |
| Thiazide Diuretics & SGAP                      | 1,170  | 11.11 | 3.74 | 2.17 | 6.46  | 2.20E-06 | 5.70E-06 |
| Inhaled Glucocorticoids & Opioids              | 1,154  | <11   | 4.53 | 2.26 | 9.08  | 2.00E-05 | 4.80E-05 |
| SGAP & Loop Diuretics                          | 1,139  | 23.70 | 3.56 | 2.43 | 5.21  | 7.20E-11 | 2.80E-10 |
| Antiparkinson Agents & Opioids                 | 1,085  | 11.06 | 5.52 | 3.12 | 9.74  | 4.00E-09 | 1.40E-08 |
| Muscle Relaxers & Opioids                      | 1,058  | <11   | 5.42 | 2.43 | 12.08 | 3.60E-05 | 8.30E-05 |
| TCA & Opioids                                  | 1,057  | <11   | 5.97 | 2.98 | 11.96 | 4.60E-07 | 1.30E-06 |
| TZD & Nitrates                                 | 1,057  | <11   | 3.84 | 1.60 | 9.24  | 2.70E-03 | 4.70E-03 |
| PPI & H1 Blockers                              | 1,053  | <11   | 4.46 | 2.23 | 8.93  | 2.40E-05 | 5.70E-05 |
| Anticonvulsants & TCA                          | 1,022  | <11   | 2.07 | 0.67 | 6.42  | 2.10E-01 | 2.70E-01 |
| SSRI/SNRI & TCA                                | 992    | <11   | 1.83 | 0.59 | 5.69  | 2.90E-01 | 3.60E-01 |
| Benzodiazepine & Loop Diuretics                | 985    | <11   | 2.27 | 0.94 | 5.47  | 6.70E-02 | 9.10E-02 |
| Oral Glucocorticoids & Anticonvulsants         | 908    | <11   | 3.62 | 1.62 | 8.07  | 1.70E-03 | 3.10E-03 |

## Appendix Table 8 Continued

|                                                         |            |               |              |             |              |                 |                 |
|---------------------------------------------------------|------------|---------------|--------------|-------------|--------------|-----------------|-----------------|
| Sedative Hypnotics & Nitrates                           | 874        | <11           | 1.76         | 0.57        | 5.46         | 3.30E-01        | 4.00E-01        |
| Benzodiazepine & Sedative Hypnotics                     | 850        | <11           | 2.70         | 0.87        | 8.38         | 8.60E-02        | 1.20E-01        |
| <b>TCA &amp; Loop Diuretics</b>                         | <b>844</b> | <b>&lt;11</b> | <b>3.31</b>  | <b>1.37</b> | <b>7.95</b>  | <b>7.60E-03</b> | <b>1.20E-02</b> |
| Inhaled Glucocorticoids & H2RA                          | 824        | <11           | 2.07         | 0.67        | 6.43         | 2.10E-01        | 2.70E-01        |
| <b>Oral Glucocorticoids &amp; Sedative Hypnotics</b>    | <b>805</b> | <b>&lt;11</b> | <b>3.94</b>  | <b>1.64</b> | <b>9.48</b>  | <b>2.20E-03</b> | <b>3.80E-03</b> |
| H2RA & Sedative Hypnotics                               | 784        | <11           | 2.69         | 1.01        | 7.17         | 4.80E-02        | 6.70E-02        |
| CAAH & Opioids                                          | 772        | <11           | 0.95         | 0.13        | 6.78         | 9.60E-01        | 9.70E-01        |
| Inhaled Glucocorticoids & Anticonvulsants               | 769        | <11           | 2.96         | 1.11        | 7.90         | 3.00E-02        | 4.40E-02        |
| <b>Inhaled Glucocorticoids &amp; Sedative Hypnotics</b> | <b>743</b> | <b>&lt;11</b> | <b>4.53</b>  | <b>1.88</b> | <b>10.89</b> | <b>7.50E-04</b> | <b>1.50E-03</b> |
| <b>Barbiturates &amp; Thiazide Diuretics</b>            | <b>736</b> | <b>&lt;11</b> | <b>4.04</b>  | <b>1.68</b> | <b>9.71</b>  | <b>1.80E-03</b> | <b>3.20E-03</b> |
| <b>Anticonvulsants &amp; Barbiturates</b>               | <b>701</b> | <b>&lt;11</b> | <b>10.03</b> | <b>5.38</b> | <b>18.69</b> | <b>3.90E-13</b> | <b>2.00E-12</b> |
| <b>Anticonvulsants &amp; Benzodiazepine</b>             | <b>697</b> | <b>&lt;11</b> | <b>3.78</b>  | <b>1.42</b> | <b>10.08</b> | <b>8.00E-03</b> | <b>1.30E-02</b> |
| Inhaled Glucocorticoids & Nitrates                      | 696        | <11           | 2.95         | 1.10        | 7.86         | 3.10E-02        | 4.50E-02        |
| <b>H2RA &amp; TZD</b>                                   | <b>691</b> | <b>&lt;11</b> | <b>3.65</b>  | <b>1.18</b> | <b>11.34</b> | <b>2.50E-02</b> | <b>3.70E-02</b> |
| Oral Glucocorticoids & H2RA                             | 684        | <11           | 2.99         | 1.12        | 7.97         | 2.90E-02        | 4.30E-02        |
| <b>TZD &amp; Sedative Hypnotics</b>                     | <b>653</b> | <b>&lt;11</b> | <b>5.96</b>  | <b>2.23</b> | <b>15.91</b> | <b>3.60E-04</b> | <b>7.30E-04</b> |
| TCA & Sedative Hypnotics                                | 653        | <11           | 3.42         | 1.10        | 10.62        | 3.30E-02        | 4.80E-02        |
| <b>SSRI/SNRI &amp; CAAH</b>                             | <b>623</b> | <b>&lt;11</b> | <b>3.81</b>  | <b>1.58</b> | <b>9.16</b>  | <b>2.90E-03</b> | <b>5.00E-03</b> |
| <b>Sedative Hypnotics &amp; Antiparkinson Agents</b>    | <b>596</b> | <b>&lt;11</b> | <b>5.51</b>  | <b>2.47</b> | <b>12.28</b> | <b>3.10E-05</b> | <b>7.20E-05</b> |
| <b>Oral Glucocorticoids &amp; Nitrates</b>              | <b>576</b> | <b>&lt;11</b> | <b>4.07</b>  | <b>1.69</b> | <b>9.79</b>  | <b>1.70E-03</b> | <b>3.10E-03</b> |
| <b>Oral Glucocorticoids &amp; Antiparkinson Agents</b>  | <b>534</b> | <b>&lt;11</b> | <b>8.65</b>  | <b>4.64</b> | <b>16.13</b> | <b>1.20E-11</b> | <b>5.10E-11</b> |
| <b>H2RA &amp; SGAP</b>                                  | <b>525</b> | <b>22.87</b>  | <b>4.59</b>  | <b>2.60</b> | <b>8.11</b>  | <b>1.50E-07</b> | <b>4.50E-07</b> |
| <b>Antiparkinson Agents &amp; FGAP</b>                  | <b>516</b> | <b>&lt;11</b> | <b>4.01</b>  | <b>1.50</b> | <b>10.70</b> | <b>5.60E-03</b> | <b>9.20E-03</b> |
| PPI & Barbiturates                                      | 507        | <11           | 2.76         | 0.89        | 8.55         | 7.90E-02        | 1.10E-01        |
| Anticonvulsants & CAAH                                  | 507        | <11           | 1.23         | 0.17        | 8.73         | 8.40E-01        | 9.20E-01        |
| <b>H1 Blockers &amp; Loop Diuretics</b>                 | <b>489</b> | <b>&lt;11</b> | <b>6.41</b>  | <b>3.20</b> | <b>12.84</b> | <b>1.60E-07</b> | <b>4.80E-07</b> |
| <b>Antiparkinson Agents &amp; Nitrates</b>              | <b>475</b> | <b>&lt;11</b> | <b>5.37</b>  | <b>2.55</b> | <b>11.30</b> | <b>9.40E-06</b> | <b>2.30E-05</b> |
| <b>Sedative Hypnotics &amp; SGAP</b>                    | <b>473</b> | <b>&lt;11</b> | <b>3.90</b>  | <b>1.94</b> | <b>7.81</b>  | <b>1.30E-04</b> | <b>2.80E-04</b> |
| H2RA & Antiparkinson Agents                             | 466        | <11           | 2.20         | 0.71        | 6.83         | 1.70E-01        | 2.20E-01        |
| <b>Benzodiazepine &amp; Antiparkinson Agents</b>        | <b>462</b> | <b>&lt;11</b> | <b>3.99</b>  | <b>1.28</b> | <b>12.40</b> | <b>1.70E-02</b> | <b>2.60E-02</b> |
| <b>Opioids &amp; SGAP</b>                               | <b>439</b> | <b>&lt;11</b> | <b>4.83</b>  | <b>2.59</b> | <b>8.99</b>  | <b>7.10E-07</b> | <b>1.90E-06</b> |
| <b>H1 Blockers &amp; Opioids</b>                        | <b>433</b> | <b>&lt;11</b> | <b>4.85</b>  | <b>1.82</b> | <b>12.92</b> | <b>1.60E-03</b> | <b>3.00E-03</b> |
| Inhaled Glucocorticoids & TZD                           | 408        | <11           | 2.50         | 0.35        | 17.75        | 3.60E-01        | 4.30E-01        |
| CAAH & Nitrates                                         | 401        | <11           | 0.00         | 0.00        | 0.00         | 9.30E-01        | 9.70E-01        |
| H2RA & TCA                                              | 379        | <11           | 1.74         | 0.25        | 12.38        | 5.80E-01        | 6.60E-01        |
| TZD & TCA                                               | 373        | <11           | 2.69         | 0.38        | 19.09        | 3.20E-01        | 3.90E-01        |
| Benzodiazepine & Nitrates                               | 368        | <11           | 1.26         | 0.18        | 8.98         | 8.10E-01        | 9.00E-01        |
| H2RA & Benzodiazepine                                   | 365        | <11           | 1.64         | 0.23        | 11.68        | 6.20E-01        | 6.90E-01        |
| <b>SSRI/SNRI &amp; Barbiturates</b>                     | <b>344</b> | <b>&lt;11</b> | <b>5.34</b>  | <b>2.00</b> | <b>14.26</b> | <b>8.20E-04</b> | <b>1.60E-03</b> |
| <b>Oral Glucocorticoids &amp; Benzodiazepine</b>        | <b>338</b> | <b>&lt;11</b> | <b>9.70</b>  | <b>4.03</b> | <b>23.35</b> | <b>3.90E-07</b> | <b>1.10E-06</b> |
| Muscle Relaxers & Thiazide Diuretics                    | 331        | <11           | 2.98         | 0.42        | 21.16        | 2.80E-01        | 3.50E-01        |
| <b>Benzodiazepine &amp; SGAP</b>                        | <b>323</b> | <b>&lt;11</b> | <b>4.73</b>  | <b>1.96</b> | <b>11.38</b> | <b>5.30E-04</b> | <b>1.10E-03</b> |
| <b>Barbiturates &amp; Loop Diuretics</b>                | <b>314</b> | <b>&lt;11</b> | <b>10.07</b> | <b>5.23</b> | <b>19.40</b> | <b>5.00E-12</b> | <b>2.20E-11</b> |
| Inhaled Glucocorticoids & Benzodiazepine                | 311        | <11           | 1.95         | 0.27        | 13.82        | 5.10E-01        | 5.90E-01        |
| TCA & Nitrates                                          | 303        | <11           | 0.00         | 0.00        | 0.00         | 9.30E-01        | 9.70E-01        |
| Oral Glucocorticoids & TZD                              | 297        | <11           | 0.00         | 0.00        | 0.00         | 9.40E-01        | 9.70E-01        |
| H2RA & CAAH                                             | 295        | <11           | 0.00         | 0.00        | 0.00         | 9.30E-01        | 9.70E-01        |
| <b>SSRI/SNRI &amp; H1 Blockers</b>                      | <b>290</b> | <b>&lt;11</b> | <b>6.19</b>  | <b>2.57</b> | <b>14.90</b> | <b>4.70E-05</b> | <b>1.10E-04</b> |
| <b>TCA &amp; Benzodiazepines</b>                        | <b>287</b> | <b>&lt;11</b> | <b>11.87</b> | <b>4.45</b> | <b>31.67</b> | <b>7.70E-07</b> | <b>2.10E-06</b> |
| <b>TZD &amp; CAAH</b>                                   | <b>287</b> | <b>&lt;11</b> | <b>7.04</b>  | <b>1.76</b> | <b>28.17</b> | <b>5.80E-03</b> | <b>9.50E-03</b> |
| <b>SSRI/SNRI &amp; FGAP</b>                             | <b>285</b> | <b>&lt;11</b> | <b>3.88</b>  | <b>1.46</b> | <b>10.36</b> | <b>6.70E-03</b> | <b>1.10E-02</b> |
| TCA & Antiparkinson Agents                              | 283        | <11           | 4.28         | 1.07        | 17.15        | 4.00E-02        | 5.70E-02        |
| Inhaled Glucocorticoids & Antiparkinson Agents          | 282        | <11           | 0.00         | 0.00        | 0.00         | 9.30E-01        | 9.70E-01        |
| <b>Nitrates &amp; SGAP</b>                              | <b>279</b> | <b>&lt;11</b> | <b>3.07</b>  | <b>1.28</b> | <b>7.39</b>  | <b>1.20E-02</b> | <b>1.90E-02</b> |
| PPI & Muscle Relaxers                                   | 275        | <11           | 0.00         | 0.00        | 0.00         | 9.50E-01        | 9.70E-01        |
| <b>TZD &amp; Antiparkinson Agents</b>                   | <b>264</b> | <b>&lt;11</b> | <b>9.58</b>  | <b>3.08</b> | <b>29.75</b> | <b>9.30E-05</b> | <b>2.10E-04</b> |
| Thiazide Diuretics & FGAP                               | 263        | <11           | 0.00         | 0.00        | 0.00         | 9.30E-01        | 9.70E-01        |
| Sedative Hypnotics & CAAH                               | 260        | <11           | 2.79         | 0.39        | 19.84        | 3.00E-01        | 3.70E-01        |
| Oral Glucocorticoids & TCA                              | 237        | <11           | 0.00         | 0.00        | 0.00         | 9.40E-01        | 9.70E-01        |
| H2RA & H1 Blockers                                      | 236        | <11           | 2.04         | 0.29        | 14.48        | 4.80E-01        | 5.60E-01        |
| <b>FGAP &amp; SGAP</b>                                  | <b>235</b> | <b>&lt;11</b> | <b>3.74</b>  | <b>1.21</b> | <b>11.63</b> | <b>2.20E-02</b> | <b>3.30E-02</b> |
| <b>PPI &amp; FGAP</b>                                   | <b>212</b> | <b>&lt;11</b> | <b>7.42</b>  | <b>3.09</b> | <b>17.87</b> | <b>7.70E-06</b> | <b>1.90E-05</b> |
| H1 Blockers & Nitrates                                  | 207        | <11           | 2.15         | 0.30        | 15.24        | 4.50E-01        | 5.30E-01        |
| <b>TZD &amp; SGAP</b>                                   | <b>203</b> | <b>&lt;11</b> | <b>5.07</b>  | <b>1.63</b> | <b>15.75</b> | <b>5.00E-03</b> | <b>8.30E-03</b> |
| Inhaled Glucocorticoids & TCA                           | 201        | <11           | 0.00         | 0.00        | 0.00         | 9.50E-01        | 9.70E-01        |
| <b>Anticonvulsants &amp; H1 Blockers</b>                | <b>198</b> | <b>&lt;11</b> | <b>5.32</b>  | <b>1.33</b> | <b>21.29</b> | <b>1.80E-02</b> | <b>2.70E-02</b> |
| TCA & SGAP                                              | 189        | <11           | 0.00         | 0.00        | 0.00         | 9.30E-01        | 9.70E-01        |
| <b>Barbiturates &amp; Antiparkinson Agents</b>          | <b>184</b> | <b>&lt;11</b> | <b>6.22</b>  | <b>1.55</b> | <b>24.93</b> | <b>9.80E-03</b> | <b>1.50E-02</b> |
| Oral Glucocorticoids & CAAH                             | 183        | <11           | 0.00         | 0.00        | 0.00         | 9.50E-01        | 9.70E-01        |
| Inhaled Glucocorticoids & SGAP                          | 183        | <11           | 2.26         | 0.56        | 9.05         | 2.50E-01        | 3.10E-01        |
| Sedative Hypnotics & H1 Blockers                        | 182        | <11           | 0.00         | 0.00        | 0.00         | 9.50E-01        | 9.70E-01        |
| <b>Inhaled Glucocorticoids &amp; CAAH</b>               | <b>176</b> | <b>&lt;11</b> | <b>8.71</b>  | <b>2.18</b> | <b>34.86</b> | <b>2.20E-03</b> | <b>3.80E-03</b> |
| Anticonvulsants & FGAP                                  | 156        | <11           | 4.22         | 1.05        | 16.93        | 4.20E-02        | 5.90E-02        |
| Oral Glucocorticoids & H1 Blockers                      | 144        | <11           | 4.11         | 0.58        | 29.21        | 1.60E-01        | 2.10E-01        |
| Barbiturates & Opioids                                  | 143        | <11           | 0.00         | 0.00        | 0.00         | 9.50E-01        | 9.70E-01        |
| TCA & CAAH                                              | 140        | <11           | 0.00         | 0.00        | 0.00         | 9.60E-01        | 9.70E-01        |
| Benzodiazepine & CAAH                                   | 137        | <11           | 0.00         | 0.00        | 0.00         | 9.60E-01        | 9.70E-01        |
| Antiparkinson Agents & CAAH                             | 130        | <11           | 3.19         | 0.45        | 22.68        | 2.50E-01        | 3.10E-01        |
| Inhaled Glucocorticoids & H1 Blockers                   | 128        | <11           | 4.48         | 0.63        | 31.85        | 1.30E-01        | 1.70E-01        |
| <b>TZD &amp; Benzodiazepine</b>                         | <b>126</b> | <b>&lt;11</b> | <b>17.98</b> | <b>4.49</b> | <b>71.98</b> | <b>4.40E-05</b> | <b>1.00E-04</b> |
| TZD & H1 Blockers                                       | 122        | <11           | 6.41         | 0.90        | 45.55        | 6.30E-02        | 8.60E-02        |
| FGAP & Loop Diuretics                                   | 117        | <11           | 0.00         | 0.00        | 0.00         | 9.30E-01        | 9.70E-01        |
| Oral Glucocorticoids & SGAP                             | 113        | <11           | 0.00         | 0.00        | 0.00         | 9.30E-01        | 9.70E-01        |
| Anticonvulsants & Muscle Relaxers                       | 111        | <11           | 0.00         | 0.00        | 0.00         | 9.70E-01        | 9.70E-01        |

## Appendix Table 8 Continued

|                       |   |   |             |             |             |                 |                 |
|-----------------------|---|---|-------------|-------------|-------------|-----------------|-----------------|
| FAD pairs with <100PY | - | - | <b>2.43</b> | <b>1.38</b> | <b>4.30</b> | <b>2.10E-03</b> | <b>3.70E-03</b> |
| 3+FAD                 | - | - | <b>5.41</b> | <b>5.08</b> | <b>5.76</b> | <b>0.00E+00</b> | <b>0.00E+00</b> |
| 0 Non-FAD             | - | - | 1.00        | -           | -           | -               | -               |
| 1 Non-FAD             | - | - | <b>0.91</b> | <b>0.85</b> | <b>0.97</b> | <b>3.20E-03</b> | <b>5.50E-03</b> |
| 2 Non-FAD             | - | - | <b>0.86</b> | <b>0.80</b> | <b>0.91</b> | <b>2.20E-06</b> | <b>5.70E-06</b> |
| 3+ Non-FAD            | - | - | <b>0.72</b> | <b>0.68</b> | <b>0.76</b> | <b>4.90E-29</b> | <b>4.20E-28</b> |

Exposure indicator variables for fracture associated drug (FAD) use reflect person days with any of 21 individual FADs and 210 possible two-way combination of these drugs (included as a specific exposure in most cases, but aggregated to "FAD pairs with <100 PY" if cohort specific observation < 100 person years). "3+FAD" is an indicator variable for person days with three-or-more FADs. The reference exposure was zero FADs. Non-FADs are 552 drug ingredients that are not FADs aggregated into status of receipt of any 1 non-FAD exposure (1 Non-FAD), 2 concurrent non-FAD exposures (2 Non-FAD) or 3+ Non-FAD exposure classified for each person, for each day of observation. Medicaid eligibility and Medicare Part D low income subsidy are two poverty indicators. Long-term care is defined as 50% or more of annual prescriptions dispensed by a long-term care pharmacy. The three categories of drugs protective of fracture are: 1. osteoporosis treatments: oral and injected bisphosphonates, calcitonin, denosumab, parathyroid hormone, 2. Estrogens-systemic estrogens, selective estrogen receptor modulators, and 3. beta-blockers. SSRI/SNRI = combined drug group of selective serotonin reuptake inhibitors and selective norepinephrine reuptake inhibitors. PPI= proton pump inhibitors, FGAP = first generation antipsychotic. SGAP = second generation antipsychotic. TCA= tricyclic antidepressants. H2RA is Histamine-2 Receptor Antagonists. TZD = Thiazolidinediones. H1 Blockers = 1st Generation Antihistamines. CAAH = Central Acting Antihypertensives. Sedative Hypnotics include only non-benzodiazepine drugs. The Tobacco/Chronic Obstructive Lung Disease is an aggregate indicator of these diagnoses. Bold if False Discovery Rate corrected P value < 0.05. Italicized if population-level impact criteria were met.
